# Supplementary material for: Development and genetics of red coloration in the zebrafish relative Danio albolineatus
Source: eLife. 2021 Aug 26;10:e70253. doi: 10.7554/eLife.70253 (PMC8416024; doi:10.7554/eLife.70253)
Supplement: Supplementary file 1. [file elife-70253-supp1.xlsx]

## Sheet: Table 1—DE genes
region with higher abundance	significance threshhold	CRISPR targeted	gene	description	baseMean	eryth_avg	xan_avg	log2FoldChange	lfcSE	stat	pvalue	padj	E1	E2	E3	E4	X1	X2	X3	X4
eryth	q<0.05	***	aoc1	amine oxidase, copper containing 1	264.924	520.342	42.75	3.524	0.206432	17.071	2.44075e-65	2.16006e-61	404	610	407	526	24	55	46	46
eryth	q<0.05		cbln2b	cerebellin 2b precursor	138.324	375.079	7.5	5.08026	0.30883	16.45	8.38043e-61	4.94446e-57	204	228	247	397	6	8	10	6
eryth	q<0.05		si:ch211-125e6	#N/A	399.883	336.395	147.5	2.14805	0.171932	12.4936	8.09013e-36	1.59106e-32	836	308	667	797	178	83	111	218
eryth	q<0.05		smyd1a	SET and MYND domain containing 1a	197.869	324.487	54.25	2.66697	0.227902	11.7022	1.24121e-31	1.83078e-28	311	418	251	386	73	37	43	64
eryth	q<0.05	***	cyp2ae2 (FO904880.1)	cytochrome P450 2J6-like (cyp2J2-l)	69.5643	316.934	8	4.05702	0.386382	10.5	8.6351e-26	9.55258e-23	214	133	112	67	10	6	6	10
—	—	***	cyp2ae1	cytochrome P450, family 2, subfamily AE, polypeptide 1	33.6873	37.75	29.75	0.377554	0.361803	1.04353	0.296701	0.999784	31	41	48	31	18	38	42	21
eryth	q<0.05		spon2b	spondin 2b, extracellular matrix protein	1102.84	695.039	599.5	1.48838	0.143821	10.3489	4.23471e-25	4.40908e-22	1246	2423	1279	1475	334	1040	481	543
eryth	q<0.05		hpca	hippocalcin	162.414	576.539	65.75	1.98279	0.200646	9.88203	4.98113e-23	4.64032e-20	275	282	266	213	80	69	60	54
eryth	q<0.05	***	zdhhc2	zinc finger, DHHC-type containing 2	54.6674	500.25	8.75	3.52778	0.360387	9.78886	1.25706e-22	1.05952e-19	109	103	92	98	10	9	8	8
eryth	q<0.05		adcyap1b	adenylate cyclase activating polypeptide 1b	170.88	656.25	5.5	6.32423	0.67389	9.38465	6.31254e-21	5.07873e-18	414	297	259	376	9	10	2	1
eryth	q<0.05	***	hand2	heart and neural crest derivatives expressed 2	72.0442	316.118	17.25	2.96986	0.326173	9.10514	8.61516e-20	6.62993e-17	101	157	131	119	15	33	11	10
eryth	q<0.05	***	zgc:172053	zgc:172053	408.587	1950.18	213	1.51403	0.185551	8.15964	3.36028e-16	2.05093e-13	737	333	671	676	278	148	144	282
eryth	q<0.05	***	spra	sepiapterin reductase a	97.8562	1847.18	39.25	1.99434	0.255542	7.80433	5.98165e-15	3.20834e-12	147	182	127	170	38	54	39	26
eryth	q<0.05		c4	complement component 4	476.2	1858.16	282	1.26056	0.161674	7.79691	6.344e-15	3.30261e-12	1037	570	820	255	384	311	347	86
eryth	q<0.05	***	mkxb	mohawk homeobox b	45.2787	410.447	10.5	2.96153	0.384971	7.69287	1.43871e-14	7.07365e-12	71	107	86	56	14	15	12	1
eryth	q<0.05		fgl2b	fibrinogen-like 2b	153.133	2848.47	71.25	1.72014	0.229081	7.50888	5.96356e-14	2.70654e-11	256	293	238	153	58	88	60	79
eryth	q<0.05		bhmt	betaine-homocysteine methyltransferase	4119.14	2134.11	2865.75	0.966985	0.131301	7.36466	1.77594e-13	7.85853e-11	4723	4901	3998	7868	2054	2916	1755	4738
eryth	q<0.05	***	mc5ra	melanocortin 5a receptor	96.4618	1273.95	35.5	2.14314	0.292314	7.33162	2.2738e-13	9.81617e-11	336	105	129	60	66	32	39	5
eryth	q<0.05		hapln1a	hyaluronan and proteoglycan link protein 1a	866.713	1294.5	534	1.14555	0.160502	7.13732	9.51653e-13	3.74317e-10	1048	1733	1176	841	675	593	468	400
eryth	q<0.05		clu	clusterin	182.273	1522.37	99.25	1.4493	0.203449	7.12363	1.05123e-12	4.04495e-10	183	305	242	331	80	132	61	124
eryth	q<0.05		itih5	inter-alpha-trypsin inhibitor heavy chain family, member 5	130.812	1135.89	68.5	1.51365	0.213317	7.09578	1.28624e-12	4.84391e-10	199	257	168	149	81	93	53	47
eryth	q<0.05	***	sfrp5	secreted frizzled-related protein 5	58.0777	1049.21	19.75	2.26828	0.322327	7.0372	1.96138e-12	6.94329e-10	162	68	63	93	32	22	10	15
eryth	q<0.05		marcksl1b	MARCKS-like 1b	348.846	1095.36	225.25	1.06385	0.151577	7.01858	2.24129e-12	7.77858e-10	608	398	309	574	295	187	153	266
eryth	q<0.05		si:dkey-241l7	#N/A	213.827	1885.55	117.5	1.38554	0.19777	7.00581	2.45567e-12	8.35873e-10	400	174	329	337	168	90	88	124
eryth	q<0.05		aldh9a1a.2	aldehyde dehydrogenase 9 family, member A1a, tandem duplicate 2	1739.97	1432.39	1217.25	0.904577	0.134128	6.74416	1.53917e-11	5.04507e-09	2564	1739	1877	2871	1085	1059	972	1753
eryth	q<0.05	***	aldh1a2	aldehyde dehydrogenase 1 family, member A2	86.2318	1806.89	41.5	1.66518	0.254764	6.53617	6.31159e-11	1.99491e-08	200	136	83	106	56	42	24	44
eryth	q<0.05		map1sa	microtubule-associated protein 1Sa	215.375	2430.76	133.75	1.14987	0.178251	6.45086	1.1122e-10	3.45368e-08	352	248	276	311	170	116	134	115
eryth	q<0.05		crhbp	corticotropin releasing hormone binding protein	909.693	2481.41	636.5	0.887772	0.138327	6.41791	1.38155e-10	4.21612e-08	1708	795	984	1244	859	506	444	737
eryth	q<0.05		pah	phenylalanine hydroxylase	1960.77	1858.22	1454	0.755252	0.122823	6.14909	7.79272e-10	2.2247e-07	3120	2072	2228	2450	1701	1430	1226	1459
eryth	q<0.05		hpdb	4-hydroxyphenylpyruvate dioxygenase b	2248.96	2460.61	1703.25	0.722434	0.117815	6.13192	8.68262e-10	2.4394e-07	2622	3053	2202	3302	1494	2072	1303	1944
eryth	q<0.05		ckbb	creatine kinase, brain b	562.515	523.276	382.5	0.974794	0.166056	5.87029	4.35045e-09	1.0132e-06	762	647	619	943	332	488	269	441
eryth	q<0.05		viml	vimentin like	95.2598	1876.11	15.5	3.78498	0.655874	5.7709	7.88502e-09	1.74456e-06	263	119	159	160	26	23	3	10
eryth	q<0.05		fstb	follistatin b	843.007	1633.04	620	0.785539	0.136923	5.73709	9.63165e-09	2.05398e-06	1210	935	961	1158	616	636	503	725
eryth	q<0.05		aldh9a1a.1	aldehyde dehydrogenase 9 family, member A1a, tandem duplicate 1	7263.62	764.513	5352.75	0.840485	0.146745	5.72752	1.0191e-08	2.12212e-06	10199	7076	7735	11688	4312	4385	3742	8972
eryth	q<0.05		si:dkey-21e2	#N/A	113.072	326.697	66.25	1.26934	0.223433	5.68108	1.3385e-08	2.75483e-06	216	102	105	217	98	48	39	80
eryth	q<0.05	***	tbx15	T-box 15	120.765	321.816	73.25	1.23125	0.218266	5.64105	1.69015e-08	3.43857e-06	165	200	130	178	73	93	43	84
eryth	q<0.05		paplnb	papilin b, proteoglycan-like sulfated glycoprotein	27.154	315.632	4.5	3.16137	0.564908	5.59625	2.19036e-08	4.40561e-06	68	48	7	76	2	7	3	6
eryth	q<0.05		abi3bpa	ABI family, member 3 (NESH) binding protein a	555.238	709.526	397	0.874474	0.158214	5.52714	3.25485e-08	6.19472e-06	1050	650	552	603	557	454	227	350
eryth	q<0.05		lmx1bb	LIM homeobox transcription factor 1, beta b	58.394	299.211	28.5	1.63733	0.29661	5.52015	3.38714e-08	6.31077e-06	97	89	90	77	22	30	30	32
eryth	q<0.05		chrdl2	chordin-like 2	108.278	597.513	63.5	1.28087	0.232304	5.51377	3.51232e-08	6.47583e-06	213	121	134	144	77	51	46	80
eryth	q<0.05		akap12b	A kinase (PRKA) anchor protein 12b	157.2	556.263	96.5	1.21323	0.221808	5.46972	4.50736e-08	8.07756e-06	232	314	142	185	144	125	66	51
eryth	q<0.05		ccl25b	chemokine (C-C motif) ligand 25b	1994.39	1099.74	1370.5	0.895171	0.16385	5.46337	4.67177e-08	8.26903e-06	4389	1313	2080	2692	2106	1087	790	1499
eryth	q<0.05		fgfbp2a	fibroblast growth factor binding protein 2a	5172.61	885.855	4019.25	0.774393	0.141951	5.45535	4.88765e-08	8.56548e-06	2330	7669	6553	8752	967	5560	3901	5649
eryth	q<0.05	***	bdh1a (zgc:113142)	3-hydroxybutyrate dehydrogenase 1	21.9184	821.75	5.5	2.91119	0.544388	5.34765	8.91051e-08	1.46033e-05	51	41	38	23	4	11	3	4
eryth	q<0.05		hgd	homogentisate 1,2-dioxygenase	944.961	1024.33	724.5	0.706254	0.134577	5.24796	1.53796e-07	2.38789e-05	997	1217	1047	1401	548	903	593	854
eryth	q<0.05		alkal2b	#N/A	66.9289	889.25	33.75	1.75092	0.337882	5.18203	2.19487e-07	3.37819e-05	120	75	91	113	15	19	33	68
eryth	q<0.05		mia	melanoma inhibitory activity	245.897	766.171	155.75	1.07822	0.209557	5.14522	2.67205e-07	4.04233e-05	394	217	267	466	127	173	123	200
eryth	q<0.05		si:dkey-261h17	#N/A	598.01	963.5	446	0.774902	0.151259	5.12301	3.00694e-07	4.51042e-05	784	967	658	591	605	519	345	315
eryth	q<0.05		entpd3	ectonucleoside triphosphate diphosphohydrolase 3	87.4955	698.908	52.5	1.22737	0.244356	5.02287	5.09038e-07	7.38523e-05	164	131	116	79	69	63	44	34
eryth	q<0.05		cxcl12a	chemokine (C-X-C motif) ligand 12a (stromal cell-derived factor 1)	2048.79	1285.96	1553.75	0.732505	0.14843	4.93501	8.01458e-07	0.000109967	2652	2277	2651	2595	1270	1717	1294	1934
eryth	q<0.05		mst1	macrophage stimulating 1	12.8871	270.276	1	4.83612	0.985844	4.90556	9.31628e-07	0.000125876	39	14	16	30	1	3	0	0
eryth	q<0.05		tlr5b	toll-like receptor 5b	94.4164	448.855	57.5	1.18232	0.241298	4.89984	9.59129e-07	0.000127644	174	162	110	78	76	69	40	45
eryth	q<0.05		c4b	complement component 4B (Chido blood group)	246.56	404.658	174.5	0.86333	0.176195	4.89986	9.59051e-07	0.000127644	272	298	418	287	188	165	213	132
eryth	q<0.05		srd5a2b	steroid-5-alpha-reductase, alpha polypeptide 2b	131.804	339.329	77.5	1.52599	0.312355	4.88543	1.03205e-06	0.000135314	680	24	23	19	290	9	4	7
eryth	q<0.05		ugt1b1	UDP glucuronosyltransferase 1 family, polypeptide B1	197.684	275.263	135	0.906056	0.18732	4.83695	1.31844e-06	0.000169105	138	388	232	284	95	194	121	130
eryth	q<0.05		col11a2	collagen, type XI, alpha 2	989.273	510.816	781.5	0.755729	0.157858	4.7874	1.68953e-06	0.000213605	1972	1570	510	736	1690	778	290	368
eryth	q<0.05		gata3	GATA binding protein 3	284.786	286.658	210	0.79898	0.16837	4.74539	2.08103e-06	0.000252289	337	344	392	365	163	182	237	258
eryth	q<0.05		il13ra2	interleukin 13 receptor, alpha 2	183.98	943.013	131.5	0.859411	0.183659	4.67939	2.87723e-06	0.000339513	200	357	181	206	99	208	100	119
eryth	q<0.05		si:dkey-164f24	#N/A	346.29	506.618	262.5	0.766594	0.167585	4.57436	4.77679e-06	0.000549021	326	419	346	630	160	312	174	404
eryth	q<0.05		slit3	slit homolog 3 (Drosophila)	561.987	305.368	434.25	0.650099	0.142535	4.56099	5.09129e-06	0.000581392	746	890	628	495	449	507	404	377
eryth	q<0.05		BX663503	#N/A	1752.68	329.921	1372.75	0.616919	0.135559	4.55093	5.34096e-06	0.000602134	1206	3036	2489	1800	935	1681	1865	1010
eryth	q<0.05		klhl32	kelch-like family member 32	42.7003	293.921	22	1.52356	0.335808	4.53701	5.70575e-06	0.000634707	97	57	49	50	32	16	18	22
eryth	q<0.05		hbba1	#N/A	184.319	437.118	105.5	1.17401	0.258829	4.53584	5.73747e-06	0.000634707	500	256	116	180	109	99	70	144
eryth	q<0.05		zgc:174888	zgc:174888	266.861	298.921	199.75	0.740969	0.163539	4.53085	5.87478e-06	0.000641874	318	288	347	384	185	195	193	226
eryth	q<0.05		LO017965	#N/A	689.321	600.303	552	0.666392	0.147282	4.52459	6.05119e-06	0.000657093	650	586	674	1397	324	383	417	1084
eryth	q<0.05		si:ch211-170d8	#N/A	362.229	332.434	279	0.68348	0.151371	4.51526	6.32388e-06	0.000680686	355	482	471	474	203	334	287	292
eryth	q<0.05		cebpa	CCAAT/enhancer binding protein (C/EBP), alpha	514.785	570.697	406.25	0.616708	0.136949	4.50319	6.69425e-06	0.00070951	566	537	513	876	365	349	339	572
eryth	q<0.05		emilin2a	elastin microfibril interfacer 2a	308.21	239.803	218.5	0.821031	0.183006	4.48635	7.24528e-06	0.000763342	374	638	338	240	265	258	217	134
eryth	q<0.05		lrfn4a	leucine rich repeat and fibronectin type III domain containing 4a	18.6313	651.224	5.75	2.66134	0.593571	4.48361	7.33904e-06	0.000768645	66	38	7	15	15	4	1	3
eryth	q<0.05		si:ch211-5k11	#N/A	102.467	449.092	56.75	1.21176	0.271601	4.46156	8.13652e-06	0.000847155	307	141	60	85	78	57	33	59
eryth	q<0.05		ptprc	protein tyrosine phosphatase, receptor type, C	466.654	432.816	365.5	0.637078	0.143112	4.45162	8.52249e-06	0.000882152	523	589	682	477	369	385	429	279
eryth	q<0.05		ndfip2	Nedd4 family interacting protein 2	316.501	573.355	236.75	0.733994	0.164978	4.44905	8.62496e-06	0.000887568	448	416	429	292	223	260	245	219
eryth	q<0.05		adgrg6	adhesion G protein-coupled receptor G6	215.582	313.171	155.5	0.804405	0.181185	4.43968	9.00929e-06	0.00092176	331	210	181	381	207	141	98	176
eryth	q<0.05		tnfsf12	tumor necrosis factor (ligand) superfamily, member 12	523.461	573.461	407	0.681322	0.153621	4.43507	9.20411e-06	0.00093628	523	589	570	879	254	455	356	563
eryth	q<0.05		zgc:92630	zgc:92630	46.4373	184.105	25	1.44227	0.32584	4.42632	9.58537e-06	0.000969492	57	68	51	95	24	31	13	32
eryth	q<0.05		qsox1	quiescin Q6 sulfhydryl oxidase 1	226.662	402.118	165	0.846278	0.191388	4.4218	9.78842e-06	0.000983471	241	373	318	223	163	228	188	81
eryth	q<0.05		si:dkey-151j17	#N/A	935.005	1852.29	463.75	1.62871	0.368421	4.42078	9.83471e-06	0.000983471	1192	713	2314	1406	485	210	375	785
eryth	q<0.05		dkk1a	dickkopf WNT signaling pathway inhibitor 1a	49.7852	396.842	24.5	1.54265	0.350028	4.40721	1.04708e-05	0.0010412	194	30	40	36	60	16	15	7
eryth	q<0.05		syne1b	spectrin repeat containing, nuclear envelope 1b	344.622	277.461	252.75	0.771995	0.177295	4.3543	1.33492e-05	0.00129116	636	321	393	396	332	276	195	208
eryth	q<0.05		c7b	complement component 7b	61.2048	1182.04	36.75	1.3934	0.321783	4.33026	1.48931e-05	0.00142102	44	100	76	122	11	67	19	50
eryth	q<0.05		emilin1b	elastin microfibril interfacer 1b	159.189	1630.3	111.75	0.85494	0.197512	4.32855	1.50094e-05	0.00142102	221	298	189	118	128	136	109	74
eryth	q<0.05		c6ast1	six-cysteine containing astacin protease 1	8.44407	1258.34	0.5	4.74679	1.10911	4.27982	1.87048e-05	0.00175172	43	9	2	13	1	0	1	0
eryth	q<0.05		AL935186	#N/A	796.158	2507.42	578.25	0.857551	0.201021	4.26598	1.99022e-05	0.00185405	313	894	881	1968	127	936	493	757
eryth	q<0.05		scn4ab	sodium channel, voltage-gated, type IV, alpha, b	166.993	1766.53	119.75	0.859717	0.202043	4.25511	2.08943e-05	0.00193628	176	269	239	172	104	144	163	68
eryth	q<0.05		pcdh2ab9	protocadherin 2 alpha b 9	99.2796	1463.62	65	1.02024	0.241225	4.22942	2.34299e-05	0.00213768	205	109	64	156	84	43	40	93
eryth	q<0.05		apnl	actinoporin-like protein	680.538	2431.61	539.25	0.601154	0.142192	4.22775	2.36037e-05	0.00214249	761	672	683	1173	461	413	565	718
eryth	q<0.05		hbaa1	hemoglobin, alpha adult 1	94.7577	1244.37	54	1.16679	0.278115	4.19534	2.72457e-05	0.00244797	274	130	56	82	70	56	30	60
eryth	q<0.05		lamb1b	laminin, beta 1b	467.722	1178.45	366.5	0.627946	0.149874	4.18983	2.79166e-05	0.00248304	526	744	537	468	375	419	401	271
eryth	q<0.05		col15a1b	collagen, type XV, alpha 1b	93.028	219.75	62.25	0.98458	0.237102	4.15256	3.2877e-05	0.00283865	141	171	106	77	80	78	52	39
eryth	q<0.05		dixdc1b	DIX domain containing 1b	167.641	787.197	117.25	0.902384	0.217886	4.14153	3.44993e-05	0.00294994	296	202	204	170	109	148	137	75
eryth	q<0.05		negr1	neuronal growth regulator 1	76.3183	2322.79	48.25	1.10538	0.267092	4.13857	3.49484e-05	0.00297397	59	98	151	109	30	56	73	34
eryth	q<0.05		ackr3b	atypical chemokine receptor 3b	311.647	1288.88	232.75	0.759876	0.183886	4.13233	3.59105e-05	0.00304122	259	536	392	376	152	237	214	328
eryth	q<0.05		ccn2b	#N/A	178.741	1293.49	126.5	0.864624	0.209309	4.13084	3.6144e-05	0.00304642	290	256	205	173	102	164	135	105
eryth	q<0.05		rbp4	retinol binding protein 4, plasma	16703.6	1856.51	13485.8	0.580034	0.142826	4.06113	4.88364e-05	0.00400187	9137	16097	17706	36745	5096	15609	10734	22504
eryth	q<0.05		sfrp2	secreted frizzled-related protein 2	464.764	1288.42	360.25	0.70178	0.174133	4.03013	5.57463e-05	0.00454705	826	506	486	459	516	430	307	188
eryth	q<0.05		tulp4b	tubby like protein 4b	15.0193	320.263	4.5	2.5403	0.637406	3.98537	6.73758e-05	0.00539616	29	41	18	12	10	5	3	0
eryth	q<0.05		mhc1zaa	major histocompatibility complex class I ZAA	195.411	377.013	148	0.724545	0.181801	3.98537	6.73743e-05	0.00539616	282	227	213	248	158	134	119	181
eryth	q<0.05		cyp24a1	cytochrome P450, family 24, subfamily A, polypeptide 1	719.304	394.197	574.5	0.733218	0.18428	3.97883	6.9254e-05	0.00549684	241	1639	1091	484	79	1103	711	405
eryth	q<0.05		dram2a	DNA-damage regulated autophagy modulator 2a	12.0376	1204.7	3.5	2.67304	0.672381	3.97549	7.02349e-05	0.00554981	18	18	24	22	1	2	4	7
eryth	q<0.05		si:dkeyp-72h1	#N/A	26.1846	1585.34	12.25	1.79804	0.454314	3.95771	7.56721e-05	0.00587455	49	29	47	34	7	7	14	21
eryth	q<0.05		loxa	lysyl oxidase a	879.675	1471.63	719.75	0.522981	0.132422	3.94935	7.83641e-05	0.00603063	305	1348	1151	1355	219	1006	839	815
eryth	q<0.05		synm	synemin, intermediate filament protein	199.026	282.079	147.5	0.82603	0.212066	3.89516	9.81325e-05	0.00726488	175	355	303	169	112	158	253	67
eryth	q<0.05		vim	vimentin	663.033	805.658	535.5	0.6028	0.155567	3.87485	0.00010669	0.00780334	565	935	776	887	380	627	378	757
eryth	q<0.05		si:ch73-173h19	#N/A	159.733	1171.66	113	0.988479	0.2554	3.87032	0.000108692	0.0079171	195	226	224	181	122	120	173	37
eryth	q<0.05		cacnb2b	calcium channel, voltage-dependent, beta 2b	7.33687	504.145	0.75	4.33069	1.12912	3.83545	0.000125334	0.00901791	9	12	11	23	1	2	0	0
eryth	q<0.05		si:ch211-160j14	#N/A	68.9599	267.908	45.25	1.05161	0.274715	3.82799	0.000129193	0.00925797	94	97	77	104	48	38	53	42
eryth	q<0.05		ndnfl	neuron-derived neurotrophic factor , like	10.0754	939.947	2	3.19063	0.834683	3.82257	0.00013207	0.00942596	10	38	9	16	2	2	0	4
eryth	q<0.05		rab38c	RAB38c, member of RAS oncogene family	5.03317	1590.28	0.25	5.06019	1.32422	3.82126	0.000132772	0.00943296	12	7	7	13	1	0	0	0
eryth	q<0.05		ppiaa	peptidylprolyl isomerase Aa (cyclophilin A)	2326.94	1760.75	1949.25	0.480709	0.12697	3.78601	0.000153087	0.0105433	2568	2621	2409	3221	1830	2303	1530	2134
eryth	q<0.05		chst2a	carbohydrate (N-acetylglucosamine-6-O) sulfotransferase 2a	171.392	1954.46	130.5	0.704195	0.187182	3.76208	0.000168503	0.0113403	214	202	218	214	126	137	119	140
eryth	q<0.05		selenop	#N/A	4266.04	1724.01	3534	0.500327	0.132889	3.765	0.000166551	0.0113403	5574	4475	4419	5524	3144	4028	3145	3819
eryth	q<0.05		slc51a	solute carrier family 51, alpha subunit	648.81	1055.89	526.5	0.574148	0.153735	3.73466	0.000187971	0.0125078	1728	594	368	395	1131	531	215	229
eryth	q<0.05		pdgfrb	platelet-derived growth factor receptor, beta polypeptide	351.441	1539.26	256.75	0.787192	0.210865	3.73315	0.000189098	0.0125357	290	765	421	308	255	319	339	114
eryth	q<0.05		grm6a	glutamate receptor, metabotropic 6a	34.6692	1321.11	19.5	1.37659	0.369379	3.72678	0.000193942	0.0127612	26	87	45	42	9	33	21	15
eryth	q<0.05		scpp7	secretory calcium-binding phosphoprotein 7	186.735	2003.8	9	4.59113	1.23529	3.71665	0.000201879	0.0132343	616	122	5	716	2	6	7	21
eryth	q<0.05		abcc8b	ATP-binding cassette, sub-family C (CFTR/MRP), member 8b	7.34354	1290.36	1.25	3.61834	0.975096	3.71075	0.000206643	0.0134966	13	22	8	10	2	2	0	1
eryth	q<0.05		wu:fk65c09	wu:fk65c09	10136.3	1983.61	6662.75	1.28695	0.348915	3.68843	0.000225644	0.0145232	9117	5948	14016	25359	3603	2969	2921	17158
eryth	q<0.05		greb1l	growth regulation by estrogen in breast cancer-like	96.996	327.382	68.25	0.926549	0.251393	3.68566	0.000228113	0.014629	169	142	120	73	103	51	84	35
eryth	q<0.05		vcanb	versican b	351.302	281.789	284	0.60076	0.163142	3.68243	0.000231017	0.0147618	565	482	336	291	469	270	208	189
eryth	q<0.05		pi15b	peptidase inhibitor 15b	13.3557	494.237	4.5	2.19743	0.598395	3.6722	0.000240472	0.0152013	27	12	32	18	4	4	5	5
eryth	q<0.05		serpinb1	serpin peptidase inhibitor, clade B (ovalbumin), member 1	151.89	407.474	111	0.786207	0.214868	3.65903	0.00025317	0.0158343	255	128	197	191	120	95	87	142
eryth	q<0.05		ugt5g1	UDP glucuronosyltransferase 5 family, polypeptide G1	92.1117	467.434	65.5	0.88943	0.244417	3.63899	0.000273709	0.0169393	126	138	87	124	78	57	43	84
eryth	q<0.05		pnp4a	purine nucleoside phosphorylase 4a	57.4332	521.316	39.5	1.28173	0.352351	3.63764	0.000275143	0.0169687	177	67	19	39	119	22	10	7
eryth	q<0.05		si:dkey-85k7	#N/A	317.584	553.224	256.5	0.56861	0.15782	3.60291	0.00031468	0.018945	445	343	391	335	303	217	243	263
eryth	q<0.05		igfbp5b	insulin-like growth factor binding protein 5b	920.922	519.868	732.25	0.548687	0.152257	3.60369	0.000313737	0.018945	1457	1318	1018	645	804	782	732	611
eryth	q<0.05		hoxc11b	homeobox C11b	136.811	433.25	103	0.728819	0.202879	3.59239	0.000327664	0.0196598	144	178	146	215	84	125	84	119
eryth	q<0.05		epas1a	endothelial PAS domain protein 1a	119.247	363.868	88	0.765224	0.213283	3.58784	0.000333434	0.0198713	98	168	187	148	59	111	102	80
eryth	q<0.05		hsd11b2	hydroxysteroid (11-beta) dehydrogenase 2	373.406	327.132	301.5	0.63686	0.178601	3.56583	0.000362706	0.0215433	524	497	446	314	403	424	219	160
eryth	q<0.05	***	adh8a	alcohol dehydrogenase 8a	88.7168	544.526	28.25	2.4726	0.693742	3.56415	0.00036504	0.0216094	283	138	84	93	14	18	22	59
eryth	q<0.05		cfbl	#N/A	59.8744	318.737	40.75	0.985336	0.279987	3.51923	0.000432806	0.0251995	109	70	65	73	58	33	32	40
eryth	q<0.05	***	xdh	xanthine dehydrogenase	16.5027	468.013	6.75	1.90229	0.541063	3.51584	0.00043836	0.0254392	43	27	19	16	7	8	5	7
eryth	q<0.05		si:ch211-209l18	#N/A	31.3916	578.066	18	1.32169	0.377231	3.50367	0.000458891	0.0264768	52	49	45	33	21	16	16	19
eryth	q<0.05		tmem179b	transmembrane protein 179B	4.823	355.303	0.5	4.38642	1.26394	3.47044	0.000519612	0.0292381	17	10	3	6	2	0	0	0
eryth	q<0.05		ablim1b	actin binding LIM protein 1b	393.818	315.697	304.25	0.620908	0.178924	3.47023	0.000520021	0.0292381	361	715	528	329	322	315	359	221
eryth	q<0.05		gpm6ab	glycoprotein M6Ab	430.353	719.118	350.5	0.527559	0.151956	3.4718	0.000516987	0.0292381	469	466	479	628	353	351	350	348
eryth	q<0.05		eif3ha	eukaryotic translation initiation factor 3, subunit H, a	2420.41	1638.41	2012	0.489065	0.141258	3.4622	0.000535778	0.0299157	2904	2290	2950	3172	1769	2262	1865	2152
eryth	q<0.05		si:ch211-251b21	#N/A	62.6107	717.5	42	0.967112	0.280135	3.4523	0.000555825	0.0308405	73	73	76	111	36	47	41	44
eryth	q<0.05		grin3ba	glutamate receptor, ionotropic, N-methyl-D-aspartate 3Ba	10.482	676.737	3.25	2.38169	0.690273	3.45035	0.000559851	0.0309668	18	15	22	14	2	3	3	5
eryth	q<0.05		EPB41L2	erythrocyte membrane protein band 4.1-like 2	514.6	1158.3	417.5	0.536814	0.155691	3.44795	0.000564851	0.0310493	707	770	538	432	505	432	342	391
eryth	q<0.05		aldh1a3	aldehyde dehydrogenase 1 family, member A3	236.389	297.447	188.75	0.594887	0.172908	3.44048	0.000580678	0.0317222	181	347	337	272	124	201	259	171
eryth	q<0.05		srgn	serglycin	626.175	1129.14	521.75	0.501309	0.146021	3.43313	0.000596648	0.0322956	603	694	709	918	421	598	407	661
eryth	q<0.05		slc6a2	solute carrier family 6 (neurotransmitter transporter), member 2	56.8076	653.539	36.75	1.10607	0.322521	3.42943	0.000604844	0.0326394	73	108	62	64	30	31	28	58
eryth	q<0.05		foxc1b	forkhead box C1b	675.008	628.276	562.5	0.506122	0.14843	3.40984	0.00065	0.0349696	741	464	876	1067	392	364	676	818
eryth	q<0.05		ntn1b	netrin 1b	35.4821	966.474	21	1.2842	0.377852	3.39869	0.000677099	0.0363171	49	53	57	40	26	11	26	21
eryth	q<0.05		slc22a7a	solute carrier family 22 (organic anion transporter), member 7a	21.709	368.368	10.75	1.82776	0.537978	3.39746	0.000680144	0.0363702	54	24	22	32	15	21	3	4
eryth	q<0.05		anos1a	anosmin 1a	97.4196	460.092	70.5	0.83294	0.245282	3.39585	0.000684151	0.0364743	123	147	129	98	66	66	64	86
eryth	q<0.05		zmp:0000001268	zmp:0000001268	15.2573	441.645	4.75	2.18652	0.645742	3.38605	0.000709062	0.037576	34	28	5	36	4	7	5	3
eryth	q<0.05		cluap1	clusterin associated protein 1	39.8754	322.816	24.5	1.21458	0.359286	3.38055	0.000723418	0.038208	62	57	46	56	15	22	31	30
eryth	q<0.05		ifitm1	interferon induced transmembrane protein 1	104.23	314.039	73.75	0.849058	0.251333	3.37821	0.000729582	0.038208	71	171	154	143	60	108	55	72
eryth	q<0.05		ak2	adenylate kinase 2	3689.64	484.092	3110.25	0.477807	0.141399	3.37914	0.000727125	0.038208	3671	3219	4029	6157	2205	3125	2404	4707
eryth	q<0.05		si:dkey-78l4	#N/A	47.401	201.987	29.75	1.14812	0.341532	3.36168	0.000774698	0.0402116	96	40	47	77	53	30	15	21
eryth	q<0.05		EFEMP1	EGF containing fibulin-like extracellular matrix protein 1	310.993	392.868	250	0.613338	0.18357	3.34117	0.000834275	0.0430515	278	440	401	370	184	275	371	170
eryth	q<0.05		irx5a	iroquois homeobox 5a	685.913	412.724	574.5	0.461199	0.138218	3.33675	0.000847633	0.0431708	748	510	698	1233	517	442	453	886
eryth	q<0.05		adh5	alcohol dehydrogenase 5	1886.61	541.987	1596.5	0.455247	0.13645	3.33638	0.000848781	0.0431708	2235	1520	1827	3125	1344	1399	1193	2450
eryth	q<0.05	***	SAT2	#N/A	40.9484	395.711	23.75	1.2172	0.365992	3.32574	0.000881829	0.0445302	60	28	80	65	33	20	18	24
eryth	q<0.05		adra2b	adrenoceptor alpha 2B	83.8146	343.118	59.5	0.920181	0.276717	3.32536	0.000883057	0.0445302	106	135	119	74	92	46	67	33
eryth	q<0.05		osr1	odd-skipped related transciption factor 1	610.793	325.355	515.75	0.457649	0.138449	3.30554	0.000947924	0.0472592	784	615	597	829	594	389	487	593
eryth	q<0.05		ephb3a	eph receptor B3a	154.73	466.974	120.5	0.650772	0.197006	3.30331	0.000955517	0.0473744	212	203	167	173	118	123	105	136
eryth	q<0.05		rnd3b	Rho family GTPase 3b	614.963	358.921	521.5	0.484885	0.147043	3.29758	0.00097522	0.0482162	1106	643	460	624	866	551	286	383
eryth	q<0.05		nacad	NAC alpha domain containing	9.52777	374.197	2.75	2.92229	0.888348	3.28958	0.00100336	0.0493979	16	5	8	37	1	4	0	6
eryth	q<0.05		mlphb	melanophilin b	26.0952	386.355	14.5	1.50257	0.45689	3.28869	0.00100656	0.0493979	33	45	47	26	23	19	12	4
eryth	q<0.05		cxcl8b.1	chemokine (C-X-C motif) ligand 8b, duplicate 1	40.3742	358	24.25	1.16641	0.3547	3.28843	0.00100749	0.0493979	97	42	39	49	26	22	23	26
eryth	q<0.05		btk	Bruton agammaglobulinemia tyrosine kinase	67.056	393.329	47.25	0.882228	0.268532	3.28537	0.00101847	0.0497983	91	89	93	74	55	40	49	45
eryth	p<0.05		vat1	vesicle amine transport 1	569.26	310.197	470.75	0.507674	0.155831	3.25784	0.00112264	0.0542916	579	759	623	710	560	481	386	456
eryth	p<0.05		ptges	prostaglandin E synthase	88.6934	347.276	63.5	0.817255	0.251612	3.24808	0.00116185	0.0555009	173	108	104	70	74	70	75	35
eryth	p<0.05		itln3	intelectin 3	14.2685	309.684	5.75	2.09676	0.647014	3.24067	0.0011925	0.0567399	1	19	32	39	0	5	4	14
eryth	p<0.05		hoxc12b	homeobox C12b	26.2335	308.684	14.25	1.36118	0.421909	3.22624	0.00125427	0.0588875	25	46	38	42	14	18	16	9
eryth	p<0.05		ptprz1b	protein tyrosine phosphatase, receptor-type, Z polypeptide 1b	40.3645	505.342	24.75	1.16724	0.362838	3.21696	0.00129556	0.0601875	68	36	57	63	30	26	15	28
eryth	p<0.05		pag1	phosphoprotein membrane anchor with glycosphingolipid microdomains 1	178.766	432.105	139.5	0.630508	0.196341	3.21129	0.00132141	0.0609088	197	225	283	168	143	165	133	117
eryth	p<0.05		stc2a	stanniocalcin 2a	223.088	499	182	0.553223	0.17239	3.20913	0.00133139	0.0610506	308	181	229	338	209	126	139	254
eryth	p<0.05		pon3	#N/A	704.369	457.895	589.5	0.500612	0.156251	3.2039	0.00135577	0.0618484	911	589	716	1059	565	530	387	876
eryth	p<0.05		osr2	odd-skipped related transciption factor 2	87.6361	259.118	58	0.860009	0.269122	3.19562	0.00139533	0.0634892	245	79	66	79	83	46	49	54
eryth	p<0.05		soul5	heme-binding protein soul5	332.356	279.289	272.5	0.533604	0.168052	3.17524	0.00149714	0.0670871	234	447	366	523	148	368	291	283
eryth	p<0.05		svep1	sushi, von Willebrand factor type A, EGF and pentraxin domain containing 1	508.887	301.539	430	0.445886	0.140745	3.16804	0.00153469	0.0682515	582	739	529	502	444	499	426	351
eryth	p<0.05		si:ch73-334d15	#N/A	180.242	229.592	140.25	0.636401	0.201132	3.1641	0.00155566	0.0690105	145	258	215	262	114	189	143	115
eryth	p<0.05		iqgap2	IQ motif containing GTPase activating protein 2	206.971	267.276	164.75	0.574478	0.181632	3.16286	0.00156227	0.0691306	334	216	266	180	183	162	178	136
eryth	p<0.05		ctdspla	CTD (carboxy-terminal domain, RNA polymerase II, polypeptide A) small phosphatase-like a	278.531	190.066	225.5	0.561547	0.178414	3.14744	0.00164708	0.0721617	377	341	294	314	181	254	232	235
eryth	p<0.05		svila	supervillin a	558.656	258.868	477.25	0.42538	0.135394	3.1418	0.00167912	0.073203	536	619	558	847	389	487	405	628
eryth	p<0.05		thnsl2	threonine synthase-like 2	17.6648	352.263	8	1.68783	0.538375	3.13504	0.0017183	0.074544	23	20	19	48	12	9	6	5
eryth	p<0.05		adgrb3	adhesion G protein-coupled receptor B3	24.2696	418.763	14	1.37748	0.439737	3.1325	0.00173325	0.0748166	43	44	35	17	23	15	12	6
eryth	p<0.05		tox	thymocyte selection-associated high mobility group box	179.617	408.158	144.5	0.592145	0.189052	3.13219	0.00173509	0.0748166	189	234	191	246	139	168	100	171
eryth	p<0.05		gpr146	G protein-coupled receptor 146	208.602	358.303	168.75	0.560853	0.179239	3.12907	0.00175358	0.0751534	300	268	257	168	195	162	206	112
eryth	p<0.05		rspo3	R-spondin 3	53.6926	404.618	37.75	0.94236	0.301528	3.12528	0.00177636	0.0759458	67	57	70	84	32	23	35	61
eryth	p<0.05		ccn4a	#N/A	6.6993	747.908	1.5	2.9178	0.935402	3.1193	0.00181279	0.0769456	8	20	6	13	3	2	0	1
eryth	p<0.05		prom2	prominin 2	49.2806	762.184	33.5	1.02126	0.327349	3.11977	0.00180989	0.0769456	71	63	72	55	41	28	50	15
eryth	p<0.05		slc7a1a	#N/A	136.292	877.724	103.5	0.843728	0.271123	3.11197	0.00185844	0.0785068	115	236	204	123	93	111	182	28
eryth	p<0.05		sptb	spectrin, beta, erythrocytic	7.85556	755.987	2.25	2.54237	0.817269	3.11081	0.00186578	0.0786291	10	25	14	6	2	3	3	1
eryth	p<0.05		cox4i2	cytochrome c oxidase subunit IV isoform 2	333.123	314.053	273.5	0.525618	0.169286	3.1049	0.00190342	0.0797345	609	255	280	428	349	194	169	382
eryth	p<0.05		pold3	polymerase (DNA-directed), delta 3, accessory subunit	88.9164	445.303	66.25	0.733353	0.236298	3.10352	0.00191236	0.0798322	87	142	85	131	53	85	56	71
eryth	p<0.05		tgfbr3	transforming growth factor, beta receptor III	103.78	395.092	76.25	0.941644	0.303722	3.10035	0.00193291	0.0804999	94	174	157	101	75	88	127	15
eryth	p<0.05		hepacam2	HEPACAM family member 2	90.8868	382.474	67.75	0.733542	0.236946	3.09583	0.00196265	0.0815469	124	58	124	149	78	39	64	90
eryth	p<0.05		scara3	scavenger receptor class A, member 3	169.941	1857.37	136.75	0.587312	0.189795	3.09446	0.00197172	0.0817316	185	247	181	200	127	161	103	156
eryth	p<0.05		pip5k1bb	phosphatidylinositol-4-phosphate 5-kinase, type I, beta b	64.8696	1025.76	45.25	0.894734	0.289318	3.09256	0.00198439	0.0818736	105	96	60	77	62	36	49	34
eryth	p<0.05		mrc1b	mannose receptor, C type 1b	100.038	1961.24	76.25	0.763132	0.24671	3.09324	0.00197983	0.0818736	137	150	121	87	114	94	62	35
eryth	p<0.05		si:ch211-180a12	#N/A	25.8341	1077.68	13.5	1.6248	0.525969	3.08914	0.00200734	0.0822627	34	53	26	39	19	3	24	8
eryth	p<0.05		lgals9l3	lectin, galactoside-binding, soluble, 9 (galectin 9)-like 3	46.1683	1056.61	30.5	1.0238	0.332303	3.08093	0.00206357	0.0843539	62	63	41	80	45	35	18	24
eryth	p<0.05		tdh	L-threonine dehydrogenase	2581.62	2032.14	2213	0.389951	0.126883	3.0733	0.00211708	0.0857489	3747	1655	3033	3365	2819	1535	1960	2538
eryth	p<0.05		iscub	iron-sulfur cluster assembly enzyme b	111.739	249.934	83.25	0.737284	0.24064	3.06385	0.00218506	0.0880992	154	94	139	174	63	86	84	100
eryth	p<0.05		pde6b	phosphodiesterase 6B, cGMP-specific, rod, beta	12.1157	332.961	4.75	2.11344	0.690143	3.06233	0.00219623	0.0883484	30	21	24	4	2	5	9	3
eryth	p<0.05		itgb2	integrin, beta 2	208.871	627.513	170.25	0.542849	0.177469	3.05884	0.00222192	0.0889775	262	271	261	196	200	160	185	136
eryth	p<0.05		opn7d	opsin 7, group member d	13.6779	1468.53	6.5	1.7945	0.588429	3.04964	0.00229118	0.0913377	28	16	20	19	11	6	3	6
eryth	p<0.05		pfn1	profilin 1	9193.27	1874.37	7907.5	0.411274	0.135004	3.04638	0.00231612	0.0919179	11382	7655	9735	13144	7485	7434	5963	10748
eryth	p<0.05		dhrs3a	dehydrogenase/reductase (SDR family) member 3a	17.8424	443.868	9	1.54539	0.50781	3.04325	0.00234035	0.0926716	20	30	22	34	11	10	4	11
eryth	p<0.05	***	rdh10a	retinol dehydrogenase 10a	61.0662	335.671	42.25	0.880751	0.289687	3.04036	0.00236299	0.0931511	97	60	105	57	45	43	43	38
eryth	p<0.05		camk1b	calcium/calmodulin-dependent protein kinase Ib	109.018	314.329	82	0.711775	0.23442	3.03632	0.00239483	0.0941968	97	128	140	178	63	81	111	73
eryth	p<0.05		colec12	collectin sub-family member 12	699.136	338.276	603.5	0.397117	0.130958	3.03241	0.00242607	0.095214	745	834	648	953	594	584	498	738
eryth	p<0.05		NPAS3	neuronal PAS domain protein 3	63.2823	1244.04	46	0.84687	0.279346	3.03161	0.0024325	0.0952551	105	65	84	69	66	32	38	48
eryth	p<0.05		plvapa	#N/A	25.8987	1331.83	14.75	1.40793	0.465602	3.02388	0.00249551	0.0968717	24	45	50	29	13	8	12	26
eryth	p<0.05		zgc:101744	zgc:101744	47.2673	1743.63	30.75	1.00357	0.331882	3.02387	0.00249568	0.0968717	82	18	64	91	30	15	26	52
eryth	p<0.05		aldob	aldolase b, fructose-bisphosphate	2994.26	1274.33	2533.25	0.419829	0.138983	3.02072	0.00252177	0.0974572	4824	1966	2838	4193	2763	1809	1963	3598
eryth	p<0.05		itih6	inter-alpha-trypsin inhibitor heavy chain family, member 6	11.3902	852.013	4	2.28561	0.758205	3.0145	0.00257402	0.0984019	6	42	11	16	1	4	10	1
eryth	p<0.05		galnt8b.1	polypeptide N-acetylgalactosaminyltransferase 8b, tandem duplicate 1	5.60906	770.803	1.25	3.13145	1.04056	3.00939	0.00261774	0.0998579	14	12	5	9	3	1	1	0
eryth	p<0.05		itga1	integrin, alpha 1	87.854	774	64.25	0.778256	0.258956	3.00536	0.00265268	0.100756	99	167	101	78	84	71	63	39
eryth	p<0.05		ccdc141	coiled-coil domain containing 141	17.2014	681.724	8.75	1.55983	0.520988	2.99398	0.00275368	0.104146	25	27	40	9	13	9	11	2
eryth	p<0.05		lygl1	lysozyme g-like 1	285.241	779.382	230.5	0.568265	0.190024	2.99049	0.00278527	0.104892	476	241	314	329	305	229	143	245
eryth	p<0.05		slc12a2	solute carrier family 12 (sodium/potassium/chloride transporter), member 2	485.543	886.526	417	0.424269	0.141938	2.98911	0.0027979	0.105144	770	535	541	371	626	379	379	284
eryth	p<0.05		esyt1b	extended synaptotagmin-like protein 1b	293.461	929.145	241.5	0.624113	0.209103	2.98471	0.00283849	0.106218	324	443	399	216	299	251	339	77
eryth	p<0.05		scin	scinderin	111.716	182.013	88.75	0.691208	0.232496	2.97299	0.00294913	0.109204	128	69	143	200	94	34	71	156
eryth	p<0.05		col10a1a	collagen, type X, alpha 1a	7427.6	1267.5	6607.25	0.357009	0.120255	2.96877	0.00298996	0.109797	10772	8461	3094	10664	8972	7651	2109	7697
eryth	p<0.05		capn12	calpain 12	956.523	671.697	825.5	0.412351	0.139322	2.9597	0.00307936	0.112381	1318	970	1010	1054	926	731	643	1002
eryth	p<0.05		epha4a	eph receptor A4a	59.4	160.395	41.25	0.86423	0.293037	2.94922	0.00318579	0.1159	59	70	65	116	47	39	35	44
eryth	p<0.05		asip2b	#N/A	131.458	261.066	100.75	0.668292	0.226714	2.94773	0.00320117	0.1159	219	138	157	134	91	117	105	90
eryth	p<0.05		grn2	granulin 2	175.486	145.816	141.75	0.61354	0.20819	2.94702	0.00320853	0.1159	172	177	227	261	88	155	114	210
eryth	p<0.05		fgl2a	fibrinogen-like 2a	211.792	295.566	171.25	0.547436	0.185756	2.94707	0.00320802	0.1159	314	253	188	254	164	205	145	171
eryth	p<0.05		ncam2	neural cell adhesion molecule 2	19.9614	198.855	10.75	1.48042	0.502626	2.94536	0.00322574	0.116284	47	22	29	18	17	15	8	3
eryth	p<0.05		kcnj2a	potassium inwardly-rectifying channel, subfamily J, member 2a	58.5716	331.026	41.75	0.871567	0.296478	2.93974	0.00328492	0.116706	70	77	77	79	44	56	40	27
eryth	p<0.05		cdh29	cadherin 29	2221.12	611.697	1924	0.373984	0.127146	2.94137	0.00326763	0.116706	2896	1928	2437	2811	1893	1791	1869	2143
eryth	p<0.05		strip2	striatin interacting protein 2	35.1656	329.921	23.25	1.04589	0.35618	2.9364	0.00332048	0.117077	45	37	60	47	17	19	29	28
eryth	p<0.05		GARNL3	#N/A	96.6341	394.618	74.25	0.781159	0.266125	2.93531	0.00333215	0.117255	156	148	87	85	116	100	59	22
eryth	p<0.05		hs3st1l2	heparan sulfate (glucosamine) 3-O-sulfotransferase 1-like 2	13.2813	199.803	6.5	1.74404	0.596245	2.92504	0.00344408	0.12	19	20	13	29	8	9	2	7
eryth	p<0.05		si:ch211-286o17	#N/A	130.619	418.697	101.75	0.665063	0.227329	2.92556	0.0034384	0.12	139	200	152	147	126	115	104	62
eryth	p<0.05		hspa8b	#N/A	69.4997	306.974	47.75	0.871797	0.300008	2.90591	0.00366187	0.126099	98	82	52	133	59	61	36	35
eryth	p<0.05		afap1l2	actin filament associated protein 1-like 2	75.1768	455.447	56.25	0.766993	0.263914	2.90623	0.00365817	0.126099	104	113	87	72	78	52	45	50
eryth	p<0.05		postna	periostin, osteoblast specific factor a	1199.85	446.039	1042.25	0.375159	0.12962	2.89429	0.0038002	0.129602	1940	1473	1050	967	1401	1175	715	878
eryth	p<0.05		igf2b	insulin-like growth factor 2b	523.864	344.382	442.25	0.441782	0.153302	2.88177	0.00395451	0.133578	776	689	523	434	471	542	349	407
eryth	p<0.05		si:dkey-28n18	#N/A	12.5131	405.197	5.75	1.78238	0.621055	2.86993	0.00410567	0.137633	16	25	20	16	9	3	4	7
eryth	p<0.05		fam169ab	family with sequence similarity 169, member Ab	66.3234	550.132	48.75	0.780512	0.272036	2.86914	0.00411584	0.137713	72	103	82	79	54	57	45	39
eryth	p<0.05		il17d	interleukin 17d	17.7275	532.553	9.25	1.47885	0.515582	2.8683	0.00412679	0.137819	36	9	25	35	16	5	6	10
eryth	p<0.05		olfm1b	olfactomedin 1b	21.5169	449.539	11.75	1.49429	0.521608	2.86478	0.00417305	0.13783	50	18	31	26	20	17	5	5
eryth	p<0.05		jam3b	junctional adhesion molecule 3b	126.663	668.908	101.25	0.605763	0.211343	2.86626	0.00415351	0.13783	114	181	143	170	78	107	83	137
eryth	p<0.05		clic4	chloride intracellular channel 4	303.614	420.855	252	0.543833	0.18999	2.86242	0.00420415	0.138061	499	405	291	227	368	226	299	115
eryth	p<0.05		cyp2p6	cytochrome P450, family 2, subfamily P, polypeptide 6	64.7665	419.066	48.25	0.773959	0.270528	2.86092	0.00422412	0.138089	88	71	59	108	44	41	37	71
eryth	p<0.05		atp1b1b	ATPase, Na+/K+ transporting, beta 1b polypeptide	89.4228	501.842	69	0.681613	0.238602	2.85669	0.00428082	0.139028	122	112	118	87	79	80	72	45
eryth	p<0.05		sec61g	Sec61 translocon gamma subunit	2188.41	649.513	1891.25	0.441989	0.15497	2.85209	0.00434332	0.140031	2196	1807	2315	3624	1391	1818	1238	3118
eryth	p<0.05		neb	nebulin	166.259	201.013	132.5	0.55375	0.194489	2.8472	0.0044106	0.141497	367	135	132	165	211	91	94	134
eryth	p<0.05		jcada	#N/A	251.078	402.868	202.75	0.519214	0.18237	2.84704	0.00441279	0.141497	190	449	299	260	184	261	206	160
eryth	p<0.05		nova2	neuro-oncological ventral antigen 2	324.123	323.132	262	0.53689	0.189042	2.84005	0.00451063	0.144373	262	446	457	380	268	287	216	277
eryth	p<0.05		zbtb38	zinc finger and BTB domain containing 38	60.5347	343.197	44.25	0.852624	0.30059	2.8365	0.00456115	0.145081	72	117	83	35	52	63	52	10
eryth	p<0.05		si:ch211-119e14	#N/A	110.621	468.776	81.75	0.724018	0.255278	2.83619	0.00456554	0.145081	76	148	158	175	76	101	58	92
eryth	p<0.05		enam	#N/A	80.7157	223.645	19	2.18638	0.772943	2.82864	0.00467458	0.148014	305	50	8	205	32	11	12	21
eryth	p<0.05		prf1	#N/A	118.686	449.447	94.25	0.625026	0.221212	2.82546	0.00472131	0.149227	196	150	142	84	130	85	116	46
eryth	p<0.05		ppp1r1c	protein phosphatase 1, regulatory (inhibitor) subunit 1C	44.1338	541.171	30.75	0.992146	0.351377	2.8236	0.0047488	0.149828	50	59	67	56	40	17	26	40
eryth	p<0.05		smarca2	SWI/SNF related, matrix associated, actin dependent regulator of chromatin, subfamily a, member 2	875.749	588.645	763.25	0.383721	0.136175	2.81784	0.00483473	0.151998	1084	861	909	1098	958	583	766	746
eryth	p<0.05		tcea3	transcription elongation factor A (SII), 3	231.87	320.895	190.75	0.516281	0.183439	2.81446	0.00488589	0.152522	331	184	282	294	197	154	161	251
eryth	p<0.05		aldh1l1	aldehyde dehydrogenase 1 family, member L1	810.68	360.947	703.75	0.374923	0.133137	2.81608	0.00486142	0.152522	988	751	1018	914	704	664	713	734
eryth	p<0.05		fabp1b.2	fatty acid binding protein 1b, liver, tandem duplicate 2	57.2043	312.145	41.25	0.877215	0.312104	2.81065	0.00494419	0.15353	60	27	36	170	46	14	13	92
eryth	p<0.05		tppp3	tubulin polymerization-promoting protein family member 3	1199.08	227.868	1048.75	0.430738	0.15325	2.81069	0.00494356	0.15353	985	1513	1485	1415	537	1110	1091	1457
eryth	p<0.05		rasl11a	RAS-like, family 11, member A	14.7249	252.882	8.25	1.6107	0.57414	2.80542	0.00502518	0.155202	14	25	26	21	3	6	6	18
eryth	p<0.05		limd2	LIM domain containing 2	169.55	255.684	138	0.637123	0.227146	2.80491	0.00503312	0.155202	212	262	206	125	183	154	173	42
eryth	p<0.05		ccl27b	chemokine (C-C motif) ligand 27b	82.2607	296.868	62	0.76287	0.272108	2.80355	0.00505427	0.155584	172	57	93	87	119	44	58	27
eryth	p<0.05		fam171a2a	#N/A	205.8	657.092	171.75	0.499575	0.178329	2.80142	0.00508779	0.156073	269	311	215	165	199	228	162	98
eryth	p<0.05		jupb	junction plakoglobin b	27.1576	213.75	17	1.16765	0.417037	2.79987	0.00511234	0.156554	36	32	49	31	16	20	25	7
eryth	p<0.05		acss1	acyl-CoA synthetase short-chain family member 1	152.913	1922.67	120.25	0.614784	0.21974	2.79778	0.00514558	0.157011	259	191	158	134	133	102	104	142
eryth	p<0.05		htra1b	HtrA serine peptidase 1b	873.236	1234.89	720.5	0.438093	0.156682	2.79607	0.00517284	0.157011	533	1876	885	811	556	1154	687	485
eryth	p<0.05		angptl4	angiopoietin-like 4	783.376	1916.03	666.75	0.439628	0.157628	2.78903	0.0052866	0.159551	1094	1189	529	787	559	991	410	707
eryth	p<0.05		raly	RALY heterogeneous nuclear ribonucleoprotein	11.5044	977.592	5.5	1.80446	0.647467	2.78695	0.00532072	0.159869	30	10	16	13	12	3	3	4
eryth	p<0.05		si:ch211-218o21	#N/A	28.9152	959.237	18.25	1.13645	0.408574	2.78149	0.00541095	0.162054	57	29	39	33	22	24	12	15
eryth	p<0.05		lama4	laminin, alpha 4	441.433	494.355	372.75	0.43433	0.156199	2.78063	0.00542543	0.162213	452	691	464	433	398	407	377	309
eryth	p<0.05		ttn.1	titin, tandem duplicate 1	48.6767	1748.84	34.75	0.858565	0.308924	2.77921	0.00544908	0.162646	58	51	83	60	34	36	40	29
eryth	p<0.05		rhbg	Rh family, B glycoprotein (gene/pseudogene)	8.89733	1498.97	3.75	2.05602	0.740264	2.77742	0.00547923	0.16327	15	9	15	16	2	1	4	8
eryth	p<0.05		coch	coagulation factor C homolog, cochlin (Limulus polyphemus)	89.1406	1755.08	70.5	0.724207	0.26088	2.77602	0.00550288	0.163699	53	115	155	108	19	72	95	96
eryth	p<0.05		marcksl1a	MARCKS-like 1a	667.217	1793.29	583	0.40902	0.14737	2.77547	0.0055122	0.163701	1105	520	586	795	935	432	336	629
eryth	p<0.05		sorbs1	sorbin and SH3 domain containing 1	160.937	1939.28	130.5	0.657296	0.237209	2.77096	0.00558921	0.165157	142	239	222	162	103	103	241	75
eryth	p<0.05		cd248b	CD248 molecule, endosialin b	9.85795	1273.32	5	2.12847	0.768552	2.76946	0.005615	0.165643	24	9	11	15	14	3	0	3
eryth	p<0.05		nptna	neuroplastin a	120.305	831.013	96	0.590764	0.213417	2.76812	0.00563808	0.166047	125	138	157	159	80	110	103	91
eryth	p<0.05		efemp2a	EGF containing fibulin-like extracellular matrix protein 2a	148.515	1346.42	120.75	0.580597	0.20999	2.76489	0.00569426	0.166868	190	213	146	156	141	167	104	71
eryth	p<0.05		plpp3	phospholipid phosphatase 3	1332.84	1932.76	1173.25	0.343395	0.124177	2.76537	0.0056859	0.166868	1373	1420	1630	1546	1193	1156	1137	1207
eryth	p<0.05		adcyap1r1a	adenylate cyclase activating polypeptide 1a (pituitary) receptor type I	102.377	1343.68	80	0.626664	0.228234	2.74571	0.00603793	0.174513	110	136	101	151	78	71	78	93
eryth	p<0.05		bglapl	bone gamma-carboxyglutamate (gla) protein, like	655.638	1337.59	375	0.937592	0.341745	2.74354	0.00607798	0.174643	2018	578	30	1119	667	339	32	462
eryth	p<0.05		cspp1a	centrosome and spindle pole associated protein 1a	17.0471	1516.89	10	1.46199	0.533466	2.74055	0.00613358	0.175621	30	32	20	15	21	7	8	4
eryth	p<0.05		si:ch211-156p11	#N/A	385.145	1211.79	326.5	0.454872	0.166069	2.73905	0.00616163	0.175621	395	382	581	417	292	353	438	223
eryth	p<0.05		naca	nascent polypeptide-associated complex alpha subunit	16355.7	2406.92	14186	0.383898	0.140093	2.74031	0.00613816	0.175621	17655	13522	18606	24318	12321	14260	11195	18968
eryth	p<0.05		myh7ba	myosin, heavy chain 7B, cardiac muscle, beta a	217.881	1241.82	182.5	0.593297	0.217081	2.73306	0.00627482	0.177419	398	199	221	195	343	145	176	66
eryth	p<0.05		slc39a10	solute carrier family 39 (zinc transporter), member 10	88.3064	943.724	65.25	0.702278	0.257601	2.72623	0.00640628	0.179986	197	90	90	69	83	59	74	45
eryth	p<0.05		SERP2	stress-associated endoplasmic reticulum protein family member 2	89.2518	1232.7	68.5	0.669728	0.245631	2.72656	0.00639988	0.179986	166	95	105	73	92	69	78	35
eryth	p<0.05		loxl1	lysyl oxidase-like 1	205.493	1198.08	169.75	0.556765	0.204446	2.72329	0.00646362	0.181309	213	314	300	137	187	159	262	71
eryth	p<0.05		zgc:66313	zgc:66313	21.6412	1714.36	12.5	1.25394	0.460877	2.72076	0.00651314	0.181834	36	19	19	49	10	13	7	20
eryth	p<0.05		cyp1d1	cytochrome P450, family 1, subfamily D, polypeptide 1	18.656	1711.61	10.5	1.45428	0.536998	2.70816	0.00676567	0.187406	23	32	17	36	15	4	11	12
eryth	p<0.05		cfd	complement factor D (adipsin)	8560.11	1713.11	7334	0.392636	0.145408	2.70024	0.00692889	0.191192	9240	5793	8329	15782	6245	6433	5137	11521
eryth	p<0.05		si:ch211-149e23	#N/A	20.7403	552.382	12	1.39405	0.516683	2.69809	0.00697391	0.191377	19	44	41	13	14	15	19	0
eryth	p<0.05		hic1	hypermethylated in cancer 1	9.26477	473.697	4	1.95112	0.723493	2.6968	0.00700085	0.191819	24	12	9	13	6	4	1	5
eryth	p<0.05		dennd2db	DENN/MADD domain containing 2Db	66.154	340.592	48.5	0.773318	0.286904	2.69539	0.0070306	0.19204	112	64	92	68	44	54	59	37
eryth	p<0.05		olfml2a	olfactomedin-like 2A	66.7404	820.842	50.75	0.737939	0.274027	2.69294	0.00708245	0.192391	107	94	55	75	74	65	29	35
eryth	p<0.05		csf1ra	colony stimulating factor 1 receptor, a	84.3976	319.658	61.5	0.845751	0.314146	2.69222	0.0070978	0.192391	45	171	135	78	45	72	112	17
eryth	p<0.05		ghrb	growth hormone receptor b	225.189	383.855	188.75	0.464029	0.172268	2.69365	0.00706747	0.192391	165	379	249	254	135	280	173	167
eryth	p<0.05		tnfaip2b	tumor necrosis factor, alpha-induced protein 2b	44.8092	834.592	32.25	0.885017	0.328897	2.69087	0.00712667	0.192878	95	36	58	42	50	14	32	33
eryth	p<0.05		slc26a6	solute carrier family 26, member 6	46.6852	847.211	33.75	0.863194	0.322251	2.67864	0.00739221	0.198848	54	71	53	61	42	33	23	37
eryth	p<0.05		pappa2	pappalysin 2	202.996	835.132	118.75	1.44373	0.538882	2.67912	0.00738169	0.198848	303	314	358	173	34	201	132	108
eryth	p<0.05		rsl24d1	ribosomal L24 domain containing 1	1453.04	887.079	1269	0.391144	0.146083	2.67754	0.00741649	0.199199	1504	1210	1619	2215	982	1193	982	1919
eryth	p<0.05		prrx1b	paired related homeobox 1b	305.226	338.066	261.75	0.438361	0.163866	2.67512	0.00747019	0.199732	242	420	278	455	195	277	179	396
eryth	p<0.05		ada	adenosine deaminase	196.776	267.895	165.5	0.478024	0.178964	2.67106	0.00756111	0.201858	216	239	215	243	147	180	138	197
eryth	p<0.05		dock9b	dedicator of cytokinesis 9b	156.337	528.171	127	0.53838	0.201729	2.66883	0.0076115	0.202288	275	210	151	106	198	116	101	93
eryth	p<0.05		loxl3a	lysyl oxidase-like 3a	326.459	529.618	276.5	0.46919	0.175882	2.66763	0.00763877	0.202405	374	378	356	397	268	380	239	219
eryth	p<0.05		porb	P450 (cytochrome) oxidoreductase b	4055.16	716.671	3591.75	0.369078	0.138556	2.66374	0.00772779	0.204152	4162	4983	4836	4094	3428	4315	4342	2282
eryth	p<0.05		nudt4a	nudix (nucleoside diphosphate linked moiety X)-type motif 4a	87.133	355.829	67.75	0.737818	0.27809	2.65316	0.00797419	0.208176	112	137	102	75	97	68	83	23
eryth	p<0.05		tp53i11a	tumor protein p53 inducible protein 11a	9.01247	470.763	4.25	1.96001	0.739308	2.65115	0.00802191	0.209113	16	19	11	9	7	7	1	2
eryth	p<0.05		proza	protein Z, vitamin K-dependent plasma glycoprotein a	115.492	329.487	86.75	0.696254	0.262854	2.64882	0.00807731	0.210248	94	219	152	112	102	79	107	59
eryth	p<0.05		CDK18	#N/A	15.8932	351.079	9.25	1.49844	0.566505	2.64505	0.00816786	0.211981	19	32	22	18	5	16	14	2
eryth	p<0.05		ntn5	netrin 5	98.94	362.895	77	0.648211	0.245162	2.64401	0.00819303	0.212285	219	100	115	50	119	76	90	23
eryth	p<0.05		moxd1	monooxygenase, DBH-like 1	190.93	429.5	156.25	0.533538	0.201896	2.64264	0.00822623	0.212561	111	311	294	187	101	201	235	88
eryth	p<0.05		myh11a	myosin, heavy chain 11a, smooth muscle	282.247	1215.37	241.75	0.430763	0.163408	2.63612	0.00838607	0.215121	348	323	373	248	248	216	318	185
eryth	p<0.05		hsd17b7	hydroxysteroid (17-beta) dehydrogenase 7	2015.63	1387.99	1783.5	0.315019	0.119775	2.63009	0.00853612	0.217395	3088	1691	2303	1909	2213	1495	1896	1530
eryth	p<0.05		pcsk9	proprotein convertase subtilisin/kexin type 9	877.753	1788.29	764.25	0.428594	0.163069	2.62831	0.00858113	0.217914	1077	1068	937	883	884	963	791	419
eryth	p<0.05		igf1	insulin-like growth factor 1	23.3149	1324.22	14.5	1.16309	0.443492	2.62258	0.00872667	0.22066	47	41	27	13	25	15	13	5
eryth	p<0.05		lrp1bb	low density lipoprotein receptor-related protein 1Bb	84.9742	1780.92	66.5	0.663931	0.25327	2.62144	0.00875589	0.221083	132	100	110	71	90	44	83	49
eryth	p<0.05		si:dkey-24p1	#N/A	46.5759	1783.45	32.25	0.861491	0.329142	2.61739	0.00886062	0.223329	106	38	43	58	37	25	26	41
eryth	p<0.05		sod3b	superoxide dismutase 3, extracellular b	156.136	1266.12	128	0.514083	0.196518	2.61596	0.00889774	0.223636	129	164	202	242	86	137	146	143
eryth	p<0.05		acta2	actin, alpha 2, smooth muscle, aorta	761.151	1330.29	678.25	0.403286	0.154329	2.61315	0.00897109	0.224913	1457	313	635	971	1070	198	421	1024
eryth	p<0.05		ptx3a	pentraxin 3, long a	295.145	2418.22	251.5	0.443461	0.169742	2.61257	0.00898653	0.224981	401	321	301	332	268	302	186	250
eryth	p<0.05		dmgdh	dimethylglycine dehydrogenase	80.7476	3016.83	63	0.661493	0.253264	2.61187	0.00900486	0.225122	139	94	71	89	100	53	54	45
eryth	p<0.05		ednraa	endothelin receptor type Aa	156.222	1442.59	129	0.59851	0.229261	2.61061	0.00903806	0.225633	181	221	205	129	191	143	130	52
eryth	p<0.05		cdh18a	cadherin 18, type 2a	39.9593	1424.75	25	1.06666	0.408869	2.60882	0.00908563	0.226501	123	27	45	25	42	34	12	12
eryth	p<0.05		zeb1b	zinc finger E-box binding homeobox 1b	131.333	1416.89	106.75	0.539271	0.207296	2.60146	0.00928285	0.229799	202	177	129	116	123	120	86	98
eryth	p<0.05		rasal3	RAS protein activator like 3	120.687	1422.61	96.25	0.577953	0.223135	2.59015	0.00959339	0.237155	120	143	184	134	106	98	92	89
eryth	p<0.05		stxbp5a	syntaxin binding protein 5a (tomosyn)	22.6002	1376.95	13.75	1.1382	0.439974	2.58697	0.00968247	0.237697	25	31	47	22	15	14	16	10
eryth	p<0.05		doc2b	double C2-like domains, beta	51.6151	1364.84	38	0.791965	0.306037	2.58781	0.00965886	0.237697	90	61	58	52	55	41	37	19
eryth	p<0.05		nansb	N-acetylneuraminic acid synthase b	516.198	1384.41	421.5	0.43382	0.167907	2.58369	0.00977491	0.239303	422	966	866	190	366	664	468	188
eryth	p<0.05		si:ch211-191i18	#N/A	22.5602	1420.61	14	1.20857	0.468832	2.57782	0.00994246	0.242733	30	36	43	15	18	18	19	1
eryth	p<0.05		rps14	ribosomal protein S14	7704.45	2352.99	6708.75	0.365542	0.141913	2.57582	0.0100004	0.243476	6767	5545	7507	14981	4749	6084	4705	11297
eryth	p<0.05		si:dkeyp-82b4	#N/A	119.417	2121.03	96.5	0.581776	0.226036	2.57381	0.0100584	0.244552	148	119	151	151	138	80	84	84
eryth	p<0.05		CABZ01079192	#N/A	17.9632	1658.18	10.75	1.2805	0.497861	2.57201	0.0101111	0.244604	27	22	30	22	7	8	13	15
eryth	p<0.05		def6a	differentially expressed in FDCP 6a homolog (mouse)	75.6162	1673.37	59	0.653616	0.254094	2.57234	0.0101013	0.244604	93	80	103	93	62	52	54	68
eryth	p<0.05		FAT4	FAT atypical cadherin 4	211.419	1248.93	176.25	0.511602	0.198979	2.57114	0.0101364	0.244604	323	281	174	208	278	129	134	164
eryth	p<0.05		slc26a2	solute carrier family 26 (anion exchanger), member 2	694.365	1500.64	617.25	0.43341	0.168587	2.57083	0.0101455	0.244604	1972	566	296	253	1611	494	252	112
eryth	p<0.05		caprin1b	cell cycle associated protein 1b	4458.96	2366.58	4021.5	0.284713	0.110736	2.57109	0.010138	0.244604	4781	4982	5215	4608	3736	4261	4197	3892
eryth	p<0.05		patz1	POZ (BTB) and AT hook containing zinc finger 1	94.8762	1656.99	75.75	0.592179	0.23107	2.56277	0.0103841	0.249386	104	140	114	98	70	89	86	58
eryth	p<0.05		btf3	basic transcription factor 3	11739.1	1730.71	10235.2	0.376136	0.146838	2.56158	0.0104198	0.249906	10654	9401	12998	19918	6982	10619	8134	15206
eryth	p<0.05		rpl26	ribosomal protein L26	4959.36	975.289	4415.75	0.310714	0.121328	2.56095	0.0104388	0.250022	5451	4505	5312	6743	3943	4392	4135	5193
eryth	p<0.05		zgc:158412	zgc:158412	24.8063	626.684	16	1.05977	0.414754	2.55517	0.0106135	0.253231	30	23	36	47	14	12	18	20
eryth	p<0.05		cdh13	cadherin 13, H-cadherin (heart)	38.3348	945.329	27.75	0.883461	0.345775	2.55502	0.0106182	0.253231	55	54	34	54	31	25	15	40
eryth	p<0.05		pno1	partner of NOB1 homolog	1612.64	452.079	1426.25	0.37038	0.145037	2.5537	0.0106586	0.253231	1786	1436	1620	2355	1048	1365	1135	2157
eryth	p<0.05		rab44	RAB44, member RAS oncogene family	27.1055	756.763	17.5	1.13604	0.444959	2.55314	0.0106758	0.2533	33	52	39	24	25	10	24	11
eryth	p<0.05		unm_sa1614	un-named sa1614	22.8581	1365.7	14.5	1.10531	0.433721	2.54844	0.0108205	0.255553	33	37	25	30	18	18	11	11
eryth	p<0.05		dpyda.3	dihydropyrimidine dehydrogenase a, tandem duplicate 3	67.8764	665.526	53.25	0.747278	0.293259	2.54818	0.0108285	0.255553	147	83	50	50	116	41	38	18
eryth	p<0.05		cox8b	cytochrome c oxidase subunit 8b	49.2929	1390.79	35.75	0.814327	0.319687	2.54727	0.0108571	0.255886	75	42	78	57	31	32	35	45
eryth	p<0.05		qdpra	quinoid dihydropteridine reductase a	419.226	1240.18	359.25	0.422271	0.166051	2.54302	0.0109898	0.25867	436	488	547	446	353	402	288	394
eryth	p<0.05		timp4	TIMP metallopeptidase inhibitor 4	57.1345	275.711	43.5	0.76337	0.300411	2.54109	0.0110508	0.25976	47	55	76	105	17	45	44	68
eryth	p<0.05		akr7a3	aldo-keto reductase family 7, member A3 (aflatoxin aldehyde reductase)	177.608	1270.3	148.25	0.470842	0.185981	2.53167	0.011352	0.265528	258	161	179	229	163	134	129	167
eryth	p<0.05		syt11a	synaptotagmin XIa	99.3539	1376.8	79.25	0.581988	0.230566	2.52417	0.0115972	0.269737	75	126	131	145	51	102	80	84
eryth	p<0.05		arpc1b	actin related protein 2/3 complex, subunit 1B	689.86	478.408	598.75	0.402193	0.159476	2.52197	0.01167	0.270223	919	529	715	960	752	507	375	761
eryth	p<0.05		ppp1r3ca	protein phosphatase 1, regulatory subunit 3Ca	63.9503	646.408	46.5	0.788462	0.313066	2.51852	0.011785	0.272316	103	73	30	120	30	61	24	71
eryth	p<0.05		nfil3-6	nuclear factor, interleukin 3 regulated, member 6	152.29	652.145	126	0.567513	0.225834	2.51297	0.0119721	0.275202	150	311	135	118	108	228	125	43
eryth	p<0.05		zgc:153704	zgc:153704	13.526	646.605	6.75	1.45594	0.581923	2.50195	0.0123511	0.281899	10	25	13	34	7	8	5	7
eryth	p<0.05		snx24	sorting nexin 24	44.5486	740.671	31.5	0.861659	0.344426	2.50173	0.0123589	0.281899	47	63	54	64	37	41	32	16
eryth	p<0.05		abca2	ATP-binding cassette, sub-family A (ABC1), member 2	181.56	633.553	150.5	0.478913	0.19171	2.49812	0.0124855	0.284054	120	244	299	189	106	139	218	139
eryth	p<0.05		rbp5	retinol binding protein 1a, cellular	153.809	643.539	129	0.48948	0.196249	2.49418	0.012625	0.286123	157	168	129	259	114	99	99	204
eryth	p<0.05		fzd7a	frizzled class receptor 7a	457.62	767.526	395	0.362102	0.145251	2.49295	0.0126688	0.286748	319	530	366	866	248	420	317	595
eryth	p<0.05		rps11	ribosomal protein S11	9598.99	1518.62	8451.25	0.33446	0.134219	2.4919	0.0127061	0.287226	10494	8505	10302	13684	7170	9066	8092	9477
eryth	p<0.05		elnb	elastin b	357.387	317.382	309.25	0.42449	0.170409	2.49101	0.0127379	0.287579	448	528	368	278	244	492	283	218
eryth	p<0.05		mical3b	microtubule associated monooxygenase, calponin and LIM domain containing 3b	58.2383	493.053	45.25	0.786225	0.315721	2.49025	0.0127652	0.287826	68	71	82	64	31	33	39	78
eryth	p<0.05		pbx1a	pre-B-cell leukemia homeobox 1a	64.4458	236.382	49	0.754099	0.304719	2.47474	0.0133334	0.298312	89	66	71	93	84	44	39	29
eryth	p<0.05		kctd12	#N/A	184.701	336.447	153	0.461744	0.186647	2.47389	0.0133651	0.298312	227	135	198	305	161	119	146	186
eryth	p<0.05		eml3	echinoderm microtubule associated protein like 3	470.076	503.526	410.75	0.392575	0.158652	2.47445	0.0133443	0.298312	652	543	456	466	590	342	413	298
eryth	p<0.05		tspan14	tetraspanin 14	169.352	476.158	136.75	0.583045	0.236148	2.46898	0.0135499	0.300921	156	281	178	193	135	161	181	70
eryth	p<0.05		ldha	lactate dehydrogenase A4	199.467	496.158	168	0.472752	0.191613	2.46723	0.0136164	0.301639	142	281	255	246	110	231	206	125
eryth	p<0.05		pou5f3	POU domain, class 5, transcription factor 3	14.4311	238.355	8.25	1.38828	0.564221	2.46052	0.0138736	0.304544	22	14	21	25	13	6	3	11
eryth	p<0.05		si:dkey-46i9	#N/A	74.1399	801.289	57.75	0.651398	0.264772	2.46022	0.0138852	0.304544	98	79	104	82	58	62	48	63
eryth	p<0.05		lrrc15	leucine rich repeat containing 15	229.455	253.763	196.5	0.446159	0.181335	2.46042	0.0138776	0.304544	274	297	247	231	243	240	141	162
eryth	p<0.05		trpc4a	transient receptor potential cation channel, subfamily C, member 4a	18.4792	235.737	9.5	1.36713	0.556062	2.45859	0.0139483	0.305551	61	14	15	20	11	16	6	5
eryth	p<0.05		irs2a	insulin receptor substrate 2a	108.684	860.066	90.75	0.573932	0.233513	2.45781	0.0139786	0.305665	123	216	95	73	77	184	65	37
eryth	p<0.05		cbfa2t2	core-binding factor, runt domain, alpha subunit 2; translocated to, 2	30.6064	398.276	19.5	1.03453	0.421446	2.45472	0.0140993	0.307337	40	35	45	46	23	22	30	3
eryth	p<0.05		pmp22a	peripheral myelin protein 22a	246.913	868.368	211.5	0.456564	0.186432	2.44896	0.014327	0.310389	341	243	265	279	263	182	135	266
eryth	p<0.05		neurl1ab	neuralized E3 ubiquitin protein ligase 1Ab	14.4926	3464.96	8	1.38186	0.56488	2.44629	0.0144335	0.311651	16	17	21	30	12	6	8	6
eryth	p<0.05		cpne4b	copine IVb	35.1996	503.671	25.25	0.905602	0.370212	2.44618	0.0144381	0.311651	59	41	52	30	39	30	21	11
eryth	p<0.05		slc25a48	solute carrier family 25, member 48	96.3483	9639.45	78.5	0.566177	0.23191	2.44137	0.0146317	0.314298	91	143	94	129	55	115	62	82
eryth	p<0.05		si:ch211-227m13	#N/A	93.7917	9636.03	71	0.688944	0.282664	2.43732	0.0147964	0.316676	107	154	141	66	65	67	63	89
eryth	p<0.05		eif3g	eukaryotic translation initiation factor 3, subunit G	1928.33	9749.76	1711.5	0.338874	0.139118	2.43588	0.0148558	0.317186	2046	1567	1942	3026	1439	1602	1250	2555
eryth	p<0.05		gal3st1a	galactose-3-O-sulfotransferase 1a	80.3351	1856.68	64.25	0.618213	0.253903	2.43484	0.0148985	0.317715	98	96	86	105	72	69	40	76
eryth	p<0.05		myo1f	myosin IF	79.4893	2610.89	63	0.66386	0.272927	2.43237	0.0150005	0.319506	91	106	110	77	80	69	77	26
eryth	p<0.05		rgcc	regulator of cell cycle	284.202	2618.42	247.25	0.424302	0.174655	2.42937	0.0151251	0.320766	290	387	267	339	199	305	156	329
eryth	p<0.05		si:dkey-251i10	#N/A	115.455	1834	95	0.537023	0.221283	2.42686	0.0152301	0.321685	135	127	127	155	95	105	67	113
eryth	p<0.05		emilin2b	elastin microfibril interfacer 2b	128.281	1781.55	105	0.561707	0.231959	2.42158	0.0154532	0.323813	138	159	173	136	104	98	79	139
eryth	p<0.05		tnfsf10	tumor necrosis factor (ligand) superfamily, member 10	361.549	1850.87	317	0.391468	0.161621	2.42213	0.0154297	0.323813	142	336	393	754	94	315	264	595
eryth	p<0.05		sesn1	sestrin 1	1427.55	1857.63	1292.5	0.358041	0.148022	2.41883	0.0155704	0.325379	942	2481	1591	1236	530	2274	1190	1176
eryth	p<0.05		abcb5	ATP-binding cassette, sub-family B (MDR/TAP), member 5	3657.14	1142.13	3234.5	0.278374	0.115123	2.41806	0.0156036	0.32545	10596	2972	1585	1166	8070	2514	1413	941
eryth	p<0.05		shank3a	SH3 and multiple ankyrin repeat domains 3a	27.953	1716.47	20.5	1.0848	0.450378	2.40865	0.0160118	0.33186	26	16	47	54	6	12	14	50
eryth	p<0.05		ppp1r14ba	protein phosphatase 1, regulatory (inhibitor) subunit 14Ba	21.659	1521.63	13.25	1.09967	0.456688	2.40793	0.016043	0.332119	25	20	24	51	16	8	13	16
eryth	p<0.05		fbln5	fibulin 5	41.21	2268.39	30	0.817781	0.340069	2.40475	0.0161834	0.334123	57	69	46	38	42	28	24	26
eryth	p<0.05		si:dkey-16p21	#N/A	536.035	2624.95	456.5	0.410983	0.170907	2.40471	0.0161851	0.334123	784	292	474	912	466	318	285	757
eryth	p<0.05		mgp	matrix Gla protein	76.9736	1526.55	61.5	0.665729	0.276934	2.40393	0.0162199	0.334218	110	71	81	108	47	52	41	106
eryth	p<0.05		rpl35	ribosomal protein L35	12717.1	2267.09	11275	0.341618	0.14216	2.40306	0.0162584	0.334501	12840	10047	13394	20357	8838	10918	8311	17033
eryth	p<0.05		tns2b	tensin 2b	161	366.197	133.75	0.48283	0.201152	2.40032	0.0163809	0.335141	223	225	165	140	154	124	130	127
eryth	p<0.05		rpl32	ribosomal protein L32	7877.37	1788.03	6881.5	0.363343	0.151317	2.40119	0.0163417	0.335141	9343	6335	8941	10874	6177	7326	5411	8612
eryth	p<0.05		rpl12	ribosomal protein L12	16726.1	2380.5	15022.5	0.304413	0.126879	2.39924	0.0164291	0.335141	17719	15485	17636	22878	12355	15715	12685	19335
eryth	p<0.05		CABZ01087948	#N/A	13.0475	332.526	7.5	1.40704	0.587079	2.39667	0.0165447	0.336986	22	26	16	12	11	7	9	3
eryth	p<0.05		CSDC2	#N/A	11.6849	336.5	6.5	1.72469	0.721311	2.39105	0.0168005	0.340628	23	22	10	13	2	9	14	1
eryth	p<0.05		mt-cyb	cytochrome b, mitochondrial	644.217	924.039	562.25	0.375421	0.157086	2.38991	0.0168527	0.341296	780	629	757	740	525	688	525	511
eryth	p<0.05		fermt2	fermitin family member 2	73.2109	1256.96	57	0.809688	0.339457	2.38525	0.0170676	0.344149	56	146	94	62	46	72	100	10
eryth	p<0.05		prkcbb	protein kinase C, beta b	125.609	1224.09	104	0.511698	0.21492	2.38088	0.0172715	0.347393	157	128	163	141	140	90	95	91
eryth	p<0.05		CABZ01047286	#N/A	31.1311	1159.03	22.25	0.962751	0.404579	2.37964	0.0173296	0.348166	53	36	43	28	35	19	30	5
eryth	p<0.05		NCKAP1L	#N/A	197.358	1485.32	169	0.418514	0.175955	2.37853	0.0173819	0.34882	234	244	236	189	180	182	177	137
eryth	p<0.05		zgc:100951	zgc:100951	6.96798	1481.12	3	2.12678	0.894521	2.37756	0.0174277	0.349344	9	12	15	7	5	2	0	5
eryth	p<0.05		ehf	ets homologous factor	113.762	1503.53	93.75	0.512139	0.215487	2.37666	0.0174703	0.349802	109	118	146	162	75	96	94	110
eryth	p<0.05		shisa4	shisa family member 4	23.991	1179.05	16	1.00681	0.424143	2.37375	0.0176086	0.351014	24	41	33	30	15	15	17	17
eryth	p<0.05		rpl30	ribosomal protein L30	4432.41	2421.32	3907.5	0.344719	0.145191	2.37424	0.017585	0.351014	4473	3565	4545	7246	3028	4035	2952	5615
eryth	p<0.05		p2rx1	purinergic receptor P2X, ligand-gated ion channel, 1	89.566	1378.36	72	0.584632	0.246464	2.37207	0.0176885	0.351905	129	81	123	95	97	65	83	43
eryth	p<0.05		coro1a	coronin, actin binding protein, 1A	593.187	1189	521.25	0.345065	0.145508	2.37145	0.0177186	0.351905	788	498	649	725	627	482	430	546
eryth	p<0.05		abcc5	ATP-binding cassette, sub-family C (CFTR/MRP), member 5	1087.25	921.145	973	0.31691	0.133655	2.37112	0.0177344	0.351905	1323	1362	1200	923	1170	931	1106	685
eryth	p<0.05		raraa	retinoic acid receptor, alpha a	65.5304	1054.55	51.5	0.640285	0.270178	2.36986	0.0177946	0.352619	91	67	65	94	71	41	37	57
eryth	p<0.05		rgrb	retinal G protein coupled receptor b	135.706	1026	110.25	0.502313	0.212149	2.36774	0.0178973	0.353946	165	73	129	277	99	70	86	186
eryth	p<0.05		wt1b	wilms tumor 1b	5.25658	2731.42	3	2.65189	1.12086	2.36594	0.0179846	0.355276	6	14	4	7	0	2	0	10
eryth	p<0.05		rps10	ribosomal protein S10	12163.1	2735.22	10805.5	0.319404	0.135223	2.36205	0.018174	0.358218	12447	9693	12866	19076	8240	10483	9346	15153
eryth	p<0.05		si:ch211-158d24	#N/A	23.0158	255.737	15.75	1.08985	0.461741	2.3603	0.0182603	0.359519	57	21	26	18	33	4	15	11
eryth	p<0.05		nrgna	neurogranin (protein kinase C substrate, RC3) a	28.4293	301.118	19.5	0.940373	0.398669	2.35878	0.0183349	0.360587	35	38	21	55	12	23	15	28
eryth	p<0.05		col4a1	collagen, type IV, alpha 1	456.627	334.132	391	0.438612	0.186015	2.35793	0.018377	0.361013	452	786	534	318	550	456	367	191
eryth	p<0.05		atf5b	activating transcription factor 5b	1084.23	395.789	975	0.293495	0.124616	2.3552	0.0185127	0.361671	1527	1070	1049	1128	1247	964	807	882
eryth	p<0.05		c1s	complement component 1, s subcomponent	65.727	350.013	52.25	0.63601	0.270259	2.35334	0.0186059	0.363091	121	71	63	62	88	42	38	41
eryth	p<0.05		zfp36l1b	zinc finger protein 36, C3H type-like 1b	1335.54	358.816	1184.5	0.303584	0.129206	2.34962	0.0187927	0.365926	2082	1267	1299	1299	1395	1070	1133	1140
eryth	p<0.05		tmem243a	transmembrane protein 243, mitochondrial a	6.09984	281.632	2.5	2.2091	0.942073	2.34494	0.0190303	0.36697	11	9	11	7	5	3	0	2
eryth	p<0.05		si:dkey-83f18	#N/A	43.0322	282.329	32.25	0.758151	0.323376	2.34448	0.0190534	0.36697	54	45	77	39	30	30	48	21
eryth	p<0.05		atp1a1a.3	ATPase, Na+/K+ transporting, alpha 1a polypeptide, tandem duplicate 3	208.986	248.908	178.75	0.413946	0.176494	2.34538	0.0190079	0.36697	248	205	256	247	182	180	177	176
eryth	p<0.05		smarca1	SWI/SNF related, matrix associated, actin dependent regulator of chromatin, subfamily a, member 1	366.437	272.355	319	0.365863	0.156034	2.34477	0.0190387	0.36697	816	252	345	243	608	173	271	224
eryth	p<0.05		col8a1b	collagen, type VIII, alpha 1b	14.9175	281.329	8.75	1.32386	0.565544	2.34086	0.0192392	0.369343	18	16	16	34	15	8	4	8
eryth	p<0.05		BX548011	#N/A	664.86	358	596	0.404029	0.172637	2.34034	0.0192664	0.369464	346	1008	436	1144	193	1126	360	705
eryth	p<0.05		CR352265	#N/A	22.8459	307.171	15.75	1.10221	0.471142	2.33944	0.0193128	0.369953	40	14	30	36	32	4	18	9
eryth	p<0.05		camk2n1a	calcium/calmodulin-dependent protein kinase II inhibitor 1a	38.4978	239.092	28.75	0.822119	0.352004	2.33554	0.0195154	0.373261	70	26	40	58	32	11	24	48
eryth	p<0.05		mlip	muscular LMNA-interacting protein	12.9088	865.211	7.25	1.34221	0.57531	2.33302	0.0196472	0.374567	16	16	21	21	9	7	5	8
eryth	p<0.05		cxcl18b	chemokine (C-X-C motif) ligand 18b	83.6287	246.395	66	0.593444	0.254352	2.33316	0.0196399	0.374567	120	65	110	111	81	62	64	57
eryth	p<0.05		eif4ebp3	eukaryotic translation initiation factor 4E binding protein 3	387.744	884.632	327	0.481251	0.206434	2.33126	0.0197399	0.375291	473	303	455	564	214	378	269	447
eryth	p<0.05		hal	histidine ammonia-lyase	17.3943	1240.76	11.25	1.23941	0.532637	2.32692	0.0199693	0.379245	17	11	40	26	8	2	15	20
eryth	p<0.05		nid1a	nidogen 1a	496.118	192.882	440.25	0.322085	0.138451	2.32634	0.0200003	0.379427	632	539	454	583	488	436	382	455
eryth	p<0.05		CABZ01051600	#N/A	53.2356	1160.03	39	0.725631	0.312932	2.31881	0.0204052	0.384226	105	39	83	45	52	36	36	32
eryth	p<0.05		aqp3b	aquaporin 3b	158.281	453.645	131.5	0.50062	0.215847	2.31932	0.0203774	0.384226	178	225	135	202	170	160	106	90
eryth	p<0.05		itgam	integrin, alpha M (complement component 3 receptor 3 subunit)	29.3161	10357.1	21	1.0143	0.437794	2.31685	0.0205118	0.385724	41	38	36	35	35	7	23	19
eryth	p<0.05		castor2	#N/A	323.561	9801.83	284.25	0.352056	0.15236	2.31068	0.0208504	0.390944	317	388	401	346	250	306	303	278
eryth	p<0.05		rassf8b	Ras association (RalGDS/AF-6) domain family (N-terminal) member 8b	20.6808	11531.2	13.25	1.04403	0.452349	2.30801	0.0209985	0.392889	26	38	25	22	12	18	13	10
eryth	p<0.05		znf609a	zinc finger protein 609a	154.535	9295.3	131.5	0.470267	0.20375	2.30806	0.0209957	0.392889	174	186	202	149	109	116	193	108
eryth	p<0.05		znf385a	zinc finger protein 385A	72.7202	12352.9	56.5	0.633186	0.274493	2.30674	0.0210691	0.393378	63	119	91	84	62	57	53	54
eryth	p<0.05		tenm1	teneurin transmembrane protein 1	37.9365	1483.39	28	0.789492	0.342521	2.30494	0.0211697	0.394617	42	46	55	48	22	21	38	31
eryth	p<0.05		sult2st3	sulfotransferase family 2, cytosolic sulfotransferase 3	2822.29	11002	2580.25	0.278154	0.120687	2.30476	0.02118	0.394617	3325	3706	3242	1984	2814	3318	2792	1397
eryth	p<0.05		cadps2	Ca++-dependent secretion activator 2	37.8615	1722.67	26.75	0.812385	0.352641	2.30372	0.0212386	0.395293	74	26	44	53	37	22	25	23
eryth	p<0.05		ppap2d	phosphatidic acid phosphatase type 2D	228.543	5007.25	196.5	0.428819	0.18626	2.30226	0.0213205	0.3964	256	289	255	243	173	195	264	154
eryth	p<0.05		ccdc125	coiled-coil domain containing 125	38.2322	2057.35	27.25	0.816232	0.354919	2.29977	0.0214611	0.39823	66	25	43	63	26	22	23	38
eryth	p<0.05		CR293511	#N/A	14.856	2559.38	9	1.21936	0.530501	2.29851	0.0215327	0.39867	23	21	15	25	11	8	7	10
eryth	p<0.05		fam169aa	family with sequence similarity 169, member Aa	176.83	3405.5	151.5	0.429718	0.186944	2.29864	0.0215253	0.39867	175	191	213	229	113	163	148	182
eryth	p<0.05		si:dkey-109a10	#N/A	9.54646	15695	4.5	1.62594	0.707769	2.29728	0.0216028	0.399133	12	12	14	19	8	3	6	1
eryth	p<0.05		muc5	#N/A	8903.54	9753.75	8053	0.375152	0.163283	2.29756	0.0215868	0.399133	7856	8578	12653	9928	5388	4433	10850	11541
eryth	p<0.05		si:ch211-205a14	#N/A	59.554	14393.2	45.5	0.765622	0.333477	2.29587	0.0216831	0.399415	99	77	66	52	29	65	65	23
eryth	p<0.05		pkn1a	protein kinase N1a	238.019	17263	206	0.425619	0.185388	2.29583	0.0216858	0.399415	151	360	338	230	120	250	326	128
eryth	p<0.05		si:dkey-5n18	#N/A	114.485	13296.2	96.25	0.523118	0.228116	2.29321	0.0218362	0.401768	157	120	101	154	105	94	50	136
eryth	p<0.05		gtpbp4	GTP binding protein 4	4196.49	1867.78	3834.75	0.290017	0.126509	2.29246	0.0218789	0.402136	3998	3730	4176	6330	2825	3380	3023	6111
eryth	p<0.05		sat2a	spermidine/spermine N1-acetyltransferase family member 2a	18.0988	1898.75	10.5	1.19214	0.521833	2.28452	0.022341	0.407665	13	11	48	31	6	8	10	18
eryth	p<0.05		gsdmea	#N/A	18.7797	1443.37	11.75	1.11953	0.489978	2.28486	0.0223207	0.407665	27	39	17	19	18	16	8	5
eryth	p<0.05		krt15	keratin 15	142892	19151.2	128365	0.339473	0.14856	2.28509	0.0223075	0.407665	132295	117919	150886	228574	81413	130267	96554	205227
eryth	p<0.05		rdh8a	retinol dehydrogenase 8a	30.8046	1255.57	21.75	0.895321	0.392677	2.28004	0.0226051	0.410984	25	37	32	66	14	32	13	28
eryth	p<0.05		AL845330	#N/A	61.1262	1392.76	46.75	0.740508	0.324804	2.27986	0.0226157	0.410984	77	42	95	89	37	43	29	78
eryth	p<0.05		rps18	ribosomal protein S18	11932.2	1907.33	10656.5	0.314974	0.138114	2.28054	0.0225756	0.410984	12591	9603	11812	18825	9085	10527	7656	15358
eryth	p<0.05		rpl13	ribosomal protein L13	10975	1510.63	9836.5	0.292608	0.128374	2.27934	0.0226466	0.411124	10110	9183	10459	18702	7137	9723	8082	14404
eryth	p<0.05		foxj1a	forkhead box J1a	21.6459	471.974	14.5	1.01189	0.445198	2.27289	0.0230328	0.416732	24	28	34	29	14	13	12	19
eryth	p<0.05		mafb	v-maf avian musculoaponeurotic fibrosarcoma oncogene homolog b (paralog b)	292.871	537.276	257.5	0.377655	0.166168	2.27273	0.0230422	0.416732	329	439	198	347	218	407	157	248
eryth	p<0.05		sf3b1	splicing factor 3b, subunit 1	3396.34	1097.55	3082.75	0.266849	0.117419	2.27261	0.0230498	0.416732	4396	3572	3483	3389	3442	2862	3335	2692
eryth	p<0.05		thbd	thrombomodulin	7.7869	1516.61	3	1.88848	0.83311	2.26679	0.0234033	0.421578	10	26	11	3	3	2	6	1
eryth	p<0.05		pcdh10a	protocadherin 10a	228.162	1522.3	196	0.440028	0.19407	2.26737	0.0233677	0.421578	342	229	195	275	276	236	124	148
eryth	p<0.05		ecm1b	extracellular matrix protein 1b	548.034	1524.46	492	0.320715	0.141568	2.26545	0.0234849	0.422442	422	749	639	605	291	641	500	536
eryth	p<0.05		igfbp7	insulin-like growth factor binding protein 7	90.866	714.553	73.75	0.538788	0.237886	2.2649	0.0235191	0.422628	113	148	84	86	91	88	60	56
eryth	p<0.05		adamts5	ADAM metallopeptidase with thrombospondin type 1 motif, 5 (aggrecanase-2)	21.1463	2481.53	14.25	1.15228	0.509281	2.26255	0.0236632	0.424334	33	35	28	16	24	10	22	1
eryth	p<0.05		cxcl12b	chemokine (C-X-C motif) ligand 12b (stromal cell-derived factor 1)	37.811	527.553	27.5	0.7905	0.349441	2.26218	0.023686	0.424334	36	62	61	35	26	30	27	27
eryth	p<0.05		si:ch211-220f21	#N/A	55.7452	1441.49	42	0.693272	0.30668	2.26057	0.023786	0.425695	56	63	62	97	54	39	37	38
eryth	p<0.05		scospondin	subcommissural organ spondin	5.46504	3009.63	2.25	2.02269	0.895854	2.25783	0.0239563	0.426243	11	7	10	6	3	1	2	3
eryth	p<0.05		dhrs11b	dehydrogenase/reductase (SDR family) member 11b	19.1736	2207.3	12.75	1.06545	0.471609	2.25919	0.0238718	0.426243	24	27	24	28	11	17	8	15
eryth	p<0.05		crebrf	creb3 regulatory factor	45.8946	2890.84	33.5	0.77055	0.341178	2.2585	0.0239144	0.426243	12	82	95	45	11	42	63	18
eryth	p<0.05		CR387919	#N/A	106.857	3006.71	89.25	0.610806	0.270722	2.25621	0.0240574	0.426243	141	130	138	87	118	97	120	22
eryth	p<0.05		tenm3	teneurin transmembrane protein 3	190.077	2207.3	159.5	0.502167	0.222466	2.25727	0.023991	0.426243	243	280	173	186	252	120	149	117
eryth	p<0.05		rps29	ribosomal protein S29	4750.08	1440.59	4175.75	0.338938	0.150182	2.25685	0.0240172	0.426243	4917	3743	5403	7234	3523	4409	3351	5420
eryth	p<0.05		plpp6	phospholipid phosphatase 6	55.5392	2374.63	43.75	0.659807	0.292729	2.25399	0.024197	0.428287	75	82	53	60	56	60	30	29
eryth	p<0.05		stk17a	serine/threonine kinase 17a	34.0539	2386.07	24.75	0.810398	0.359921	2.2516	0.0243474	0.430089	48	55	37	34	33	28	18	20
eryth	p<0.05		cyp27c1	cytochrome P450, family 27, subfamily C, polypeptide 1	79.4591	3015.21	63.75	0.588432	0.261583	2.2495	0.0244805	0.431105	113	92	88	87	63	63	84	45
eryth	p<0.05		description:si:ch73-103b11	#N/A	389.066	2399.33	341.25	0.343168	0.152576	2.24916	0.0245023	0.431105	611	336	453	347	453	275	315	322
eryth	p<0.05		nrbp2a	nuclear receptor binding protein 2a	120.311	3019.87	97	0.58654	0.261146	2.24603	0.0247023	0.433374	75	186	158	155	70	129	141	48
eryth	p<0.05		rpl34	ribosomal protein L34	11414.8	3019.89	10161.5	0.345056	0.153732	2.24454	0.0247979	0.434577	11262	8767	12141	18502	7763	9958	6872	16053
eryth	p<0.05		stmn4	stathmin-like 4	32.0926	1609.67	21	0.903462	0.402702	2.2435	0.0248647	0.434886	64	27	18	65	29	18	18	19
eryth	p<0.05		il7r	interleukin 7 receptor	14.8092	1670.51	9	1.29847	0.579333	2.24132	0.0250053	0.436053	14	26	23	21	15	9	9	3
eryth	p<0.05		luzp2	leucine zipper protein 2	18.9093	1038.96	12	1.11601	0.498159	2.24026	0.0250742	0.436824	54	18	12	20	21	10	4	13
eryth	p<0.05		trabd2b	#N/A	88.5429	1700.54	72.75	0.529708	0.236646	2.23839	0.0251954	0.438074	112	93	96	117	72	73	60	86
eryth	p<0.05		rpl35a	ribosomal protein L35a	8093.21	1157.99	7228.75	0.311121	0.139104	2.2366	0.0253125	0.438949	8323	6679	8425	12402	5669	7464	5842	9940
eryth	p<0.05		rps15a	ribosomal protein S15a	8939.14	1491.74	8004.25	0.31827	0.142308	2.23648	0.0253202	0.438949	8761	6852	9140	14743	6068	7554	5811	12584
eryth	p<0.05		nr4a2b	nuclear receptor subfamily 4, group A, member 2b	103.224	280.697	76.25	0.631958	0.282811	2.23456	0.0254461	0.440701	184	72	227	38	115	39	92	59
eryth	p<0.05		dock7	dedicator of cytokinesis 7	221.645	244.368	191.25	0.407353	0.18245	2.23269	0.0255697	0.441976	304	217	278	209	235	167	164	199
eryth	p<0.05		cyp26a1	cytochrome P450, family 26, subfamily A, polypeptide 1	722.148	390.776	653.25	0.353563	0.158348	2.23282	0.025561	0.441976	254	870	1057	983	173	650	693	1097
eryth	p<0.05		derl3	derlin 3	38.1442	561.5	28.25	0.760128	0.340699	2.23108	0.0256756	0.44251	45	39	42	67	25	29	22	37
eryth	p<0.05		dmd	dystrophin	78.8567	257.829	64.5	0.553753	0.248192	2.23115	0.0256713	0.44251	120	67	101	85	90	41	66	61
eryth	p<0.05		DDX17	#N/A	822.437	477.026	753	0.326705	0.146663	2.22758	0.0259082	0.445652	1579	703	750	536	1467	551	674	320
eryth	p<0.05		CABZ01079480	#N/A	248.665	537.408	213.5	0.384464	0.17276	2.22542	0.0260527	0.446647	394	260	206	275	244	213	180	217
eryth	p<0.05		chd2	chromodomain helicase DNA binding protein 2	585.937	542.013	527	0.305501	0.13727	2.22554	0.0260449	0.446647	558	574	620	828	446	482	447	733
eryth	p<0.05		ces2b	#N/A	95.3333	578.395	78	0.532405	0.239619	2.22188	0.0262911	0.449617	165	85	134	66	124	70	76	42
eryth	p<0.05		si:dkey-239h2	#N/A	22.1616	591.605	13.75	1.04474	0.470751	2.2193	0.0264666	0.451744	33	18	21	49	18	17	7	13
eryth	p<0.05		six1b	SIX homeobox 1b	6.65083	595.066	3	1.81926	0.820324	2.21773	0.0265734	0.452298	11	13	8	9	4	3	1	4
eryth	p<0.05		arhgap45b	#N/A	282.151	1537.49	245.25	0.368562	0.166491	2.2137	0.0268491	0.456512	271	380	378	247	240	290	243	208
eryth	p<0.05		si:ch211-209n20	#N/A	77.9705	1523.36	61.5	0.60721	0.274703	2.21043	0.0270757	0.459041	69	139	74	96	41	61	77	67
eryth	p<0.05		si:dkeyp-98a7	#N/A	86.8089	1045.5	69.5	0.599611	0.271241	2.21062	0.0270621	0.459041	94	78	143	102	62	59	55	102
eryth	p<0.05		rbp1	retinol binding protein 1b, cellular	7.07886	352.763	3.75	1.75652	0.797008	2.20389	0.0275322	0.464155	12	9	7	13	4	3	1	7
eryth	p<0.05		bahcc1b	#N/A	250.431	1078.25	219.5	0.389018	0.17649	2.2042	0.0275106	0.464155	235	193	333	364	140	156	308	274
eryth	p<0.05		si:ch211-213d14	#N/A	781.705	1129.71	687.75	0.336547	0.152808	2.20242	0.0276357	0.464608	1251	598	765	889	855	609	480	807
eryth	p<0.05		klhl17	kelch-like family member 17	30.5654	458.947	22.75	0.827061	0.375799	2.20081	0.0277496	0.46512	27	35	46	46	13	21	25	32
eryth	p<0.05		BX571884	#N/A	7.42919	510.316	3.75	1.71976	0.781837	2.19964	0.0278328	0.465879	16	7	12	10	2	3	3	7
eryth	p<0.05		si:dkey-104n9	#N/A	6.3576	1811.32	3.25	1.99267	0.907544	2.19567	0.0281153	0.467707	8	11	12	7	0	7	2	4
eryth	p<0.05		gcgra	glucagon receptor a	12.2138	1767.71	7	1.31338	0.598157	2.19571	0.028113	0.467707	16	13	22	18	3	8	9	8
eryth	p<0.05		add3a	adducin 3 (gamma) a	376.407	1812.29	330.25	0.372597	0.169805	2.19426	0.0282165	0.46895	375	529	457	330	350	326	435	210
eryth	p<0.05		krt18b	#N/A	4652.44	1607.47	4256.25	0.252733	0.115323	2.19152	0.0284142	0.470909	4719	6303	4197	4975	3620	5241	3441	4723
eryth	p<0.05		si:ch211-250g4	#N/A	14.4102	1487.8	8.25	1.31516	0.600314	2.19079	0.0284671	0.470973	30	23	24	6	9	12	4	8
eryth	p<0.05		TAGAP	#N/A	93.5507	517.368	74.5	0.575721	0.262843	2.19036	0.0284978	0.470973	62	190	126	73	66	108	94	30
eryth	p<0.05		gyg1a	glycogenin 1a	305.049	983.579	268.75	0.350909	0.160273	2.18945	0.0285643	0.47163	349	305	346	366	234	259	263	319
eryth	p<0.05		zgc:154125	zgc:154125	23.0788	1469.16	16	0.940778	0.430048	2.18761	0.0286978	0.472359	35	29	34	23	19	15	20	10
eryth	p<0.05		triobpa	TRIO and F-actin binding protein a	48.0728	693.013	36.75	0.667044	0.304881	2.18788	0.0286781	0.472359	54	52	45	86	32	34	32	49
eryth	p<0.05		rgmb	repulsive guidance molecule family member b	116.271	1500.43	98	0.464448	0.212582	2.18479	0.028904	0.475024	100	155	136	148	69	117	107	99
eryth	p<0.05		rpl22	ribosomal protein L22	11177.5	2166.92	10057	0.308561	0.141314	2.18351	0.0289986	0.475164	11644	8924	10919	17705	8217	9832	6947	15232
eryth	p<0.05		tln1	talin 1	2383.96	398.224	2166.5	0.264605	0.121227	2.18272	0.0290566	0.475325	2250	2922	2788	2445	2106	2278	2471	1811
eryth	p<0.05		col4a2	collagen, type IV, alpha 2	264.872	1521.3	231.5	0.481318	0.220654	2.18133	0.0291592	0.476563	293	419	296	184	348	260	247	71
eryth	p<0.05		ak5	adenylate kinase 5	34.2639	1745.05	25.25	0.773243	0.355128	2.17736	0.0294534	0.47946	42	47	47	38	27	26	29	19
eryth	p<0.05		cyp8b3	cytochrome P450, family 8, subfamily B, polypeptide 3	108.412	1521.86	89.5	0.509267	0.234302	2.17355	0.0297386	0.483355	283	110	79	36	196	89	46	27
eryth	p<0.05		fer1l6	fer-1-like family member 6	54.4339	1909.12	43.75	0.64243	0.295633	2.17306	0.0297755	0.483511	73	37	47	104	42	21	31	81
eryth	p<0.05		EML5	#N/A	7.90985	1236.93	3.5	1.97376	0.908457	2.17265	0.0298069	0.483577	11	3	27	9	2	9	1	2
eryth	p<0.05		scara5	scavenger receptor class A, member 5 (putative)	68.1137	878.026	54.25	0.611582	0.281583	2.17195	0.0298598	0.483987	132	90	63	42	98	38	49	32
eryth	p<0.05		rps26	ribosomal protein S26	1993.96	1305.07	1773.75	0.344579	0.158729	2.17086	0.0299416	0.483987	1996	1439	1994	3428	1302	1674	1183	2936
eryth	p<0.05		mdh1aa	malate dehydrogenase 1Aa, NAD (soluble)	2193.53	1871.42	1963.75	0.294726	0.135755	2.17101	0.0299303	0.483987	2474	2021	2167	3032	1652	2074	1909	2220
eryth	p<0.05		hspa4l	heat shock protein 4 like	8.69434	746.053	4.5	1.61064	0.744289	2.164	0.0304643	0.490199	15	7	13	17	4	5	1	8
eryth	p<0.05		unk	unkempt family zinc finger	62.8755	1228.83	48.75	0.624966	0.288879	2.16342	0.0305089	0.490312	52	109	95	53	51	53	58	33
eryth	p<0.05		slc40a1	solute carrier family 40 (iron-regulated transporter), member 1	163.07	753.276	140.5	0.421761	0.194972	2.16319	0.0305268	0.490312	144	200	201	198	100	180	127	155
eryth	p<0.05		eno3	enolase 3, (beta, muscle)	2391.66	330.842	2131	0.312162	0.144334	2.16277	0.0305589	0.490383	2204	1830	2337	4239	1548	2081	1577	3318
eryth	p<0.05		soul2	heme-binding protein soul2	288.08	379.658	251	0.369641	0.171014	2.16146	0.0306598	0.491556	338	250	336	376	247	245	208	304
eryth	p<0.05		slco2b1	solute carrier organic anion transporter family, member 2B1	1223.25	362.697	1104.5	0.288646	0.133607	2.16041	0.0307406	0.492406	1888	1116	1341	1022	1477	1066	1188	687
eryth	p<0.05		or128-1	odorant receptor, family E, subfamily 128, member 1	14.5322	1090.7	8.75	1.17605	0.546111	2.15349	0.0312798	0.499236	13	24	17	28	6	13	9	7
eryth	p<0.05		tmem145	transmembrane protein 145	6.32655	927.947	2.75	1.9019	0.883623	2.15238	0.0313673	0.499731	10	13	7	9	2	3	6	0
eryth	p<0.05		CABZ01065328	#N/A	13.4015	1094.7	9	1.28897	0.59981	2.14897	0.0316371	0.503124	25	15	22	10	16	6	13	1
eryth	p<0.05		jac7	#N/A	6.64905	266.434	3	1.7731	0.827391	2.143	0.0321132	0.5048	14	12	7	9	5	2	4	1
eryth	p<0.05		si:ch211-244c8	#N/A	12.5398	208.211	7	1.25042	0.583141	2.14428	0.0320102	0.5048	11	22	23	16	6	7	10	5
eryth	p<0.05		p2ry1	purinergic receptor P2Y, G-protein coupled, 1	54.0373	258.066	42.5	0.719756	0.335325	2.14644	0.0318378	0.5048	85	63	58	56	44	33	73	20
eryth	p<0.05		zgc:154055	zgc:154055	71.7257	220.368	57.75	0.581867	0.27142	2.14379	0.0320499	0.5048	80	85	107	71	70	66	51	44
eryth	p<0.05		vdac1	voltage-dependent anion channel 1	708	226.421	629	0.326144	0.152122	2.14396	0.0320362	0.5048	858	611	751	928	545	638	535	798
eryth	p<0.05		rps28	ribosomal protein S28	8683.9	1101.26	7834.25	0.289689	0.135099	2.14428	0.0320108	0.5048	8928	7119	8666	13421	6215	7774	6100	11248
eryth	p<0.05		htra3a	HtrA serine peptidase 3a	5.15417	277.461	2	2.14458	1.00327	2.13759	0.0325498	0.507875	3	6	12	11	1	5	1	1
eryth	p<0.05		pkn1b	protein kinase N1b	87.1007	282.316	72.25	0.505479	0.236473	2.13757	0.0325513	0.507875	90	105	111	102	58	79	80	72
eryth	p<0.05		syngr2b	synaptogyrin 2b	49.7597	891.474	39.25	0.650738	0.305037	2.13331	0.0328997	0.511709	61	40	49	90	31	24	35	67
eryth	p<0.05		tox3	TOX high mobility group box family member 3	44.2522	911.276	33.25	0.733525	0.343963	2.13257	0.0329603	0.512201	45	71	57	47	48	28	33	24
eryth	p<0.05		grik4	glutamate receptor, ionotropic, kainate 4	7.52539	911.092	3.75	1.72773	0.810712	2.13113	0.0330788	0.513592	13	15	11	7	1	2	6	6
eryth	p<0.05		RGS13	regulator of G-protein signaling 13	20.4676	512.434	13.75	1.05452	0.495167	2.12963	0.0332022	0.514604	24	24	38	23	22	15	14	4
eryth	p<0.05		pcbd1	pterin-4 alpha-carbinolamine dehydratase/dimerization cofactor of hepatocyte nuclear factor 1 alpha	140.723	511.895	119.25	0.448052	0.21069	2.1266	0.0334536	0.516891	148	161	150	188	112	156	102	107
eryth	p<0.05		pik3cg	phosphatidylinositol-4,5-bisphosphate 3-kinase, catalytic subunit gamma	108.2	1410.88	90.5	0.490197	0.23061	2.12565	0.0335322	0.517454	101	136	166	101	94	101	115	52
eryth	p<0.05		cacnb4a	calcium channel, voltage-dependent, beta 4a subunit	5.68476	1149.01	2.25	1.93004	0.908918	2.12345	0.033716	0.518733	6	9	10	11	5	1	2	1
eryth	p<0.05		ak4	adenylate kinase 4	432.027	1423.82	383.25	0.321793	0.151556	2.12326	0.0337323	0.518733	354	570	540	459	333	445	451	304
eryth	p<0.05		lenep	lens epithelial protein	5.08668	1170.79	2.25	2.05219	0.967908	2.12023	0.0339865	0.521735	13	7	7	6	4	3	2	0
eryth	p<0.05		nhsl1a	NHS-like 1a	31.6951	1605.61	24	0.798915	0.377366	2.11708	0.0342529	0.523555	36	33	35	55	24	20	14	38
eryth	p<0.05		fancl	Fanconi anemia, complementation group L	16.0985	1757.38	10.25	1.07683	0.508851	2.1162	0.0343275	0.524243	14	23	30	21	9	11	13	8
eryth	p<0.05		sost	sclerostin	799.262	2868.28	715.25	0.32127	0.151991	2.11375	0.0345364	0.525375	932	841	904	857	541	802	727	791
eryth	p<0.05		zcchc24	zinc finger, CCHC domain containing 24	352.528	1141.28	311.5	0.333847	0.158067	2.11207	0.0346809	0.526008	303	485	384	404	278	344	266	358
eryth	p<0.05		laptm5	#N/A	75.1762	2658.99	62	0.548367	0.260451	2.10545	0.0352518	0.531932	103	90	80	81	83	46	52	67
eryth	p<0.05		si:ch211-196f2	#N/A	29.0466	2869.05	20.75	0.837366	0.398054	2.10365	0.0354091	0.533817	43	27	44	36	25	23	16	19
eryth	p<0.05		si:ch211-287a12	#N/A	35.4575	484.171	26.75	0.785291	0.373763	2.10104	0.0356374	0.536071	41	54	57	26	13	35	34	25
eryth	p<0.05		map3k8	mitogen-activated protein kinase kinase kinase 8	58.9599	620.645	46	0.629185	0.29948	2.10093	0.0356472	0.536071	40	85	71	93	31	53	63	37
eryth	p<0.05		ano5b	anoctamin 5b	81.3471	485.803	67.5	0.568068	0.270631	2.09905	0.0358124	0.536975	95	101	113	71	79	82	84	25
eryth	p<0.05		rps19	ribosomal protein S19	16244	1120.74	14540.2	0.315065	0.150267	2.0967	0.0360203	0.538934	14910	11787	16023	29071	9818	14099	10385	23859
eryth	p<0.05	***	bco2l	beta-carotene 15, 15-dioxygenase 2, like	114.06	1161.36	97	0.453725	0.216543	2.09531	0.0361431	0.540038	94	121	154	155	60	101	106	121
eryth	p<0.05		ctbp2a	C-terminal binding protein 2a	178.389	1160.84	152.25	0.420157	0.200675	2.09371	0.0362854	0.540771	205	270	149	194	198	171	129	111
eryth	p<0.05		cnp	2',3'-cyclic nucleotide 3' phosphodiesterase	557.976	1190.05	495.75	0.325994	0.155771	2.09278	0.0363691	0.541408	760	507	566	646	485	486	393	619
eryth	p<0.05		kdm4c	lysine (K)-specific demethylase 4C	99.2678	972.803	83	0.490563	0.234623	2.09086	0.0365408	0.543049	130	115	117	100	84	78	110	60
eryth	p<0.05		foxa3	forkhead box A3	89.9843	1952.18	74	0.502888	0.24088	2.08771	0.0368236	0.545877	153	76	105	90	86	53	85	72
eryth	p<0.05		rps17	ribosomal protein S17	4437.67	1745.8	3989.25	0.324188	0.15526	2.08803	0.0367951	0.545877	3890	3392	4708	7555	2671	3953	2753	6580
eryth	p<0.05		CR385077	#N/A	6.99455	751.566	4	1.97134	0.94474	2.08664	0.0369203	0.546376	15	11	9	4	11	0	5	0
eryth	p<0.05		cald1b	caldesmon 1b	16.5614	1823.2	10.5	1.07707	0.516253	2.08632	0.0369498	0.546376	30	12	22	26	17	6	12	7
eryth	p<0.05		ppm1la	protein phosphatase, Mg2+/Mn2+ dependent, 1La	140.444	533.789	119	0.448481	0.215291	2.08314	0.0372386	0.549269	204	125	178	141	132	99	100	145
eryth	p<0.05		grk4	G protein-coupled receptor kinase 4	327.356	757.737	289.25	0.334386	0.160518	2.08317	0.0372362	0.549269	313	371	405	371	280	324	313	240
eryth	p<0.05		rps27	#N/A	13586.4	1157.43	12216	0.319251	0.153341	2.08196	0.0373459	0.550393	14989	10520	15347	18972	10172	11455	8830	18407
eryth	p<0.05		zgc:163014	zgc:163014	5.97264	366.697	2.5	1.80609	0.868557	2.07941	0.0375795	0.551997	9	13	6	9	2	3	4	1
eryth	p<0.05		sfrp1b	secreted frizzled-related protein 1b	1113.09	370.382	1011.5	0.287737	0.138445	2.07836	0.0376763	0.552503	743	1308	1349	1458	562	1384	1035	1065
eryth	p<0.05		pcgf5a	polycomb group ring finger 5a	17.0616	264.553	11	1.07952	0.52128	2.07091	0.0383675	0.560234	19	39	21	15	9	10	17	8
eryth	p<0.05		rpe65b	retinal pigment epithelium-specific protein 65b	85.7108	224.184	71.25	0.494926	0.238909	2.07161	0.0383019	0.560234	120	89	76	116	80	70	50	85
eryth	p<0.05		adamtsl7	ADAMTS-like 7	11.7323	266.013	7	1.23941	0.59924	2.06831	0.0386113	0.561561	20	21	10	14	9	8	3	8
eryth	p<0.05		znf652	zinc finger protein 652	70.5352	273.803	57	0.538872	0.260583	2.06795	0.0386449	0.561589	60	96	101	80	50	59	68	51
eryth	p<0.05		npsn	nephrosin	29.2269	300.447	20.25	0.899187	0.434984	2.06717	0.0387181	0.561729	25	46	36	44	26	12	29	14
eryth	p<0.05		si:ch73-86n18	#N/A	160.22	239.684	139.5	0.449675	0.217839	2.06425	0.0389939	0.56404	198	151	147	228	106	142	84	226
eryth	p<0.05		dars1	#N/A	1211.93	333.211	1096.25	0.265669	0.128707	2.06414	0.0390048	0.56404	1186	1193	1261	1671	956	1149	1075	1205
eryth	p<0.05		col14a1a	collagen, type XIV, alpha 1a	218.511	249.197	189.75	0.375594	0.182014	2.06355	0.0390608	0.564388	247	343	206	192	239	224	162	134
eryth	p<0.05		si:ch211-165i18	#N/A	10.7117	232.605	6	1.32968	0.644906	2.06182	0.0392248	0.565374	19	8	10	23	11	3	5	5
eryth	p<0.05		mtbl	metallothionein-B-like	22.7833	230.303	14.25	0.956052	0.463597	2.06225	0.0391841	0.565374	18	19	18	70	11	17	8	21
eryth	p<0.05		zdhhc20a	zinc finger, DHHC-type containing 20a	19.6701	402.974	13.5	1.0568	0.512894	2.06046	0.0393547	0.565445	20	34	29	20	22	10	18	4
eryth	p<0.05		cat	catalase	250.031	777.605	219.25	0.345333	0.167695	2.05929	0.0394661	0.566544	186	285	249	403	138	238	218	283
eryth	p<0.05		foxo3b	forkhead box O3b	459.151	444.263	414.25	0.299101	0.145427	2.05671	0.0397145	0.568727	465	617	617	316	344	495	567	251
eryth	p<0.05		pdk2b	pyruvate dehydrogenase kinase, isozyme 2b	48.3997	182.487	38.25	0.657912	0.319947	2.05631	0.0397522	0.568807	38	129	40	28	26	89	23	15
eryth	p<0.05		gdf10a	growth differentiation factor 10a	202.285	378.395	175.75	0.367159	0.178765	2.05387	0.0399885	0.571264	216	246	174	280	172	209	140	182
eryth	p<0.05		dpy19l3	dpy-19-like 3 (C. elegans)	101.577	218.211	81	0.528162	0.257208	2.05344	0.0400298	0.571393	126	154	153	56	81	96	75	72
eryth	p<0.05		acta1b	actin, alpha 1b, skeletal muscle	19.0299	298.684	12.75	1.04024	0.506896	2.05217	0.0401533	0.572596	35	18	27	22	7	11	14	19
eryth	p<0.05		gpr183a	G protein-coupled receptor 183a	25.4342	271.671	18	0.84318	0.410925	2.05191	0.0401788	0.572596	26	41	31	33	18	16	19	19
eryth	p<0.05		wrap53	WD repeat containing, antisense to TP53	78.0934	946.092	63.5	0.540926	0.26381	2.05044	0.0403217	0.574171	111	72	103	85	63	75	68	48
eryth	p<0.05		zap70	zeta-chain (TCR) associated protein kinase	74.2872	221.171	60.25	0.546943	0.267161	2.04724	0.0406341	0.575379	78	91	107	77	69	64	51	57
eryth	p<0.05		lipcb	lipase, hepatic b	86.5983	821.763	72	0.541394	0.264415	2.04752	0.0406073	0.575379	80	71	122	133	54	60	51	123
eryth	p<0.05		msh6	mutS homolog 6 (E. coli)	92.205	85.8684	77.5	0.479908	0.234199	2.04914	0.0404482	0.575379	124	121	91	92	94	80	58	78
eryth	p<0.05		lect2l	leukocyte cell-derived chemotaxin 2 like	198.497	901.75	166.75	0.409233	0.19982	2.04801	0.040559	0.575379	411	79	161	271	225	74	116	252
eryth	p<0.05		suz12a	SUZ12 polycomb repressive complex 2a subunit	102	217.816	86	0.464732	0.227124	2.04616	0.0407405	0.576424	133	118	105	115	115	83	75	71
eryth	p<0.05		si:ch211-184m13	#N/A	13.2747	275.75	8.25	1.18066	0.577266	2.04526	0.0408296	0.576763	17	17	18	22	5	13	9	6
eryth	p<0.05		galnt13	UDP-N-acetyl-alpha-D-galactosamine:polypeptide N-acetylgalactosaminyltransferase 13	34.4462	501.5	25.5	0.762858	0.373095	2.04467	0.0408871	0.577114	36	31	44	63	32	22	16	32
eryth	p<0.05		phyhd1	phytanoyl-CoA dioxygenase domain containing 1	160.353	342.421	137.25	0.428198	0.209538	2.04353	0.0409998	0.578244	183	151	186	214	123	164	106	156
eryth	p<0.05		arhgap4b	Rho GTPase activating protein 4b	74.9164	494.539	61.5	0.532177	0.260465	2.04318	0.0410348	0.578278	76	95	117	66	68	61	81	36
eryth	p<0.05		cyp7a1	cytochrome P450, family 7, subfamily A, polypeptide 1	519.133	230.316	379.25	0.479196	0.234764	2.04118	0.0412328	0.579222	2563	24	18	31	1445	14	13	45
eryth	p<0.05		abca1a	ATP-binding cassette, sub-family A (ABC1), member 1A	731.24	255.158	660.5	0.30049	0.147204	2.04132	0.0412194	0.579222	504	1273	920	511	348	913	947	434
eryth	p<0.05		ldhba	lactate dehydrogenase Ba	6144.91	693.053	5572.5	0.291453	0.142756	2.04161	0.0411905	0.579222	6128	4543	6715	9484	3893	4908	4717	8772
eryth	p<0.05		tek	TEK tyrosine kinase, endothelial	34.8222	231.816	25.75	0.745974	0.365524	2.04083	0.0412673	0.579248	63	21	49	42	40	18	20	25
eryth	p<0.05		cfap58	cilia and flagella associated protein 58	5.82966	177.053	3	1.83022	0.897334	2.03962	0.041388	0.579438	16	6	5	8	3	2	1	6
eryth	p<0.05		abcg1	ATP-binding cassette, sub-family G (WHITE), member 1	8.14433	185.855	4.25	1.4722	0.721912	2.03931	0.041419	0.579438	12	13	11	12	2	7	4	4
eryth	p<0.05		si:dkey-276j7	#N/A	285.047	253.763	253.25	0.338803	0.166113	2.03959	0.0413908	0.579438	306	267	320	375	224	240	213	336
eryth	p<0.05		pdk4	pyruvate dehydrogenase kinase, isozyme 4	10.3698	180.276	6	1.35324	0.664537	2.03637	0.041713	0.581812	7	19	19	15	3	9	10	2
eryth	p<0.05		cemip2	#N/A	297.773	178.974	265.25	0.35031	0.172099	2.03552	0.041799	0.582554	420	358	318	225	349	271	309	132
eryth	p<0.05		prkacba	protein kinase, cAMP-dependent, catalytic, beta a	61.7769	181.474	48.75	0.592543	0.291328	2.03394	0.0419578	0.583847	63	51	76	110	50	48	34	63
eryth	p<0.05		lpl	lipoprotein lipase	16.7884	1221.66	10	1.14696	0.564849	2.03057	0.042299	0.586749	27	39	16	12	10	5	14	11
eryth	p<0.05		nf1a	neurofibromin 1a	222.662	935.355	191.25	0.412542	0.203345	2.02878	0.0424805	0.587636	268	319	218	210	175	179	257	154
eryth	p<0.05		ttpa	tocopherol (alpha) transfer protein	9.91564	874.382	5.5	1.48031	0.729934	2.02801	0.0425594	0.588057	6	14	11	26	10	7	2	3
eryth	p<0.05		fam102bb	family with sequence similarity 102, member B, b	56.8548	1476.97	45.5	0.591295	0.291615	2.02766	0.0425953	0.588094	48	98	80	46	37	61	61	23
eryth	p<0.05		mical1	microtubule associated monooxygenase, calponin and LIM domain containing 1	29.5323	1537.75	22	0.795166	0.392493	2.02594	0.0427712	0.589603	44	42	38	24	30	28	22	8
eryth	p<0.05		comp	cartilage oligomeric matrix protein	17.9538	2824	11.25	1.05649	0.522685	2.02128	0.0432505	0.592403	11	33	35	19	13	17	10	5
eryth	p<0.05		cldn11a	claudin 11a	16.9587	1414.82	11.5	1.012	0.50073	2.02104	0.0432755	0.592403	35	19	15	22	14	8	10	14
eryth	p<0.05		sla1a	#N/A	25.2241	1793.37	18	0.892469	0.441532	2.0213	0.0432488	0.592403	30	32	34	34	29	18	17	8
eryth	p<0.05		haus7	HAUS augmin-like complex, subunit 7	37.6206	1980.89	29.75	0.726954	0.359566	2.02175	0.0432017	0.592403	40	49	41	52	18	21	28	52
eryth	p<0.05		glis1a	GLIS family zinc finger 1a	52.9461	1990.97	42.5	0.685366	0.338897	2.02234	0.0431412	0.592403	66	67	65	57	49	49	17	55
eryth	p<0.05		gpt2l	glutamic pyruvate transaminase (alanine aminotransferase) 2, like	123.236	1761.53	103.5	0.45093	0.2231	2.0212	0.0432588	0.592403	162	158	107	144	109	121	107	77
eryth	p<0.05		svild	#N/A	323.244	668.895	287.25	0.323526	0.160075	2.02109	0.0432704	0.592403	346	411	314	367	330	300	259	260
eryth	p<0.05		col11a1b	collagen, type XI, alpha 1b	782.922	1787.45	736	0.37569	0.186037	2.01944	0.0434419	0.593763	1116	1128	509	566	1459	851	342	292
eryth	p<0.05		abcb4	ATP-binding cassette, sub-family B (MDR/TAP), member 4	34.6629	1416.38	27.25	0.778212	0.385689	2.01772	0.0436209	0.59483	94	31	32	12	70	15	17	7
eryth	p<0.05		fh	fumarate hydratase	585.436	1716.51	526.75	0.280896	0.139212	2.01776	0.0436167	0.59483	762	537	611	667	554	488	542	523
eryth	p<0.05		st3gal1l	ST3 beta-galactoside alpha-2,3-sialyltransferase 1, like	12.9949	1522.01	8	1.15465	0.574177	2.01096	0.0443297	0.601714	19	8	16	29	8	3	10	11
eryth	p<0.05		il15	interleukin 15	104.798	1725.58	89.25	0.44735	0.222593	2.00972	0.0444611	0.603035	142	91	123	126	100	67	81	109
eryth	p<0.05		ezh1	enhancer of zeste 1 polycomb repressive complex 2 subunit	260.243	1740.32	230.25	0.335732	0.167113	2.00901	0.0445362	0.603592	367	238	309	246	275	199	278	169
eryth	p<0.05		rps23	ribosomal protein S23	11144.5	2159.39	10086.5	0.302621	0.15078	2.00703	0.0447461	0.605509	9619	8547	11274	19371	6483	10162	7121	16580
eryth	p<0.05		ptpn6	protein tyrosine phosphatase, non-receptor type 6	207.634	1369.46	179.75	0.365845	0.182697	2.00247	0.0452343	0.608955	257	167	252	264	187	167	172	193
eryth	p<0.05		stk35	serine/threonine kinase 35	370.607	2377.53	333.25	0.343167	0.171405	2.00208	0.045276	0.608955	461	534	415	222	395	369	436	133
eryth	p<0.05		aldh6a1	aldehyde dehydrogenase 6 family, member A1	2086.38	1492.41	1913	0.247424	0.123638	2.00119	0.0453715	0.609777	2443	2021	2186	2390	1779	1751	1800	2322
eryth	p<0.05		ptprz1a	protein tyrosine phosphatase, receptor-type, Z polypeptide 1a	155.813	3006.55	135	0.382672	0.191274	2.00065	0.0454306	0.610108	224	133	177	172	167	109	127	137
eryth	p<0.05		faima	Fas apoptotic inhibitory molecule a	6.12373	3001.83	3	1.80775	0.904411	1.99882	0.0456281	0.611741	9	7	11	10	2	3	7	0
eryth	p<0.05		abca12	ATP-binding cassette, sub-family A (ABC1), member 12	532.532	3033.5	488	0.283225	0.141685	1.99898	0.0456105	0.611741	1089	451	469	300	986	366	361	239
eryth	p<0.05		akap12a	A kinase (PRKA) anchor protein 12a	6.3208	9576.07	2.5	1.9006	0.952259	1.99588	0.0459468	0.61378	3	27	4	6	2	7	0	1
eryth	p<0.05		cyfip2	cytoplasmic FMR1 interacting protein 2	72.2722	9564.32	59	0.529139	0.265246	1.9949	0.0460537	0.614663	73	98	105	67	67	68	59	42
eryth	p<0.05		dub	duboraya	55.6952	1162.11	44.75	0.569612	0.286472	1.98837	0.0467709	0.615643	59	59	59	88	46	39	35	59
eryth	p<0.05		vaspa	vasodilator-stimulated phosphoprotein a	66.263	2336.66	53.75	0.569463	0.285841	1.99223	0.0463453	0.615643	78	68	101	69	59	69	50	37
eryth	p<0.05		sh3bgrl	SH3 domain binding glutamate-rich protein like	169.001	2337.16	146.75	0.397505	0.199897	1.98855	0.0467505	0.615643	167	200	203	196	127	189	164	107
eryth	p<0.05		rab40b	RAB40B, member RAS oncogene family	255.744	2358.39	226.75	0.330818	0.166461	1.98735	0.0468832	0.615643	376	246	235	282	308	177	212	210
eryth	p<0.05		fam13a	family with sequence similarity 13, member A	266.312	2348.41	237.5	0.330122	0.165683	1.99249	0.0463168	0.615643	289	395	247	251	197	342	196	215
eryth	p<0.05		chd3	chromodomain helicase DNA binding protein 3	422.558	2329.05	381.25	0.299302	0.150479	1.989	0.0467016	0.615643	600	472	446	336	559	338	336	292
eryth	p<0.05		tmc6b	transmembrane channel-like 6b	1129.23	1189.96	1013.75	0.2806	0.140916	1.99126	0.0464521	0.615643	1384	961	1184	1450	946	965	1104	1040
eryth	p<0.05		rpl28	ribosomal protein L28	5348.04	3574.66	4842.75	0.280404	0.141092	1.98738	0.0468808	0.615643	5271	4153	5598	8390	3731	4695	3763	7182
eryth	p<0.05		eef1b2	eukaryotic translation elongation factor 1 beta 2	8475.65	2594.53	7690.75	0.31235	0.157138	1.98775	0.0468396	0.615643	8582	6531	8515	13415	5568	7640	5083	12472
eryth	p<0.05		rpl18	ribosomal protein L18	13799.6	9573.53	12558.8	0.259558	0.130266	1.99252	0.0463142	0.615643	12446	11300	13410	23004	8865	12394	10316	18660
eryth	p<0.05		carmil2	#N/A	29.5617	1147.38	22.25	0.788533	0.397016	1.98615	0.0470169	0.616182	36	39	39	33	24	18	35	12
eryth	p<0.05		pafah1b3	platelet-activating factor acetylhydrolase, isoform Ib, gamma subunit	276.638	1156.47	248.25	0.329553	0.165917	1.98625	0.0470059	0.616182	287	267	288	379	199	216	216	362
eryth	p<0.05		gnai2b	guanine nucleotide binding protein (G protein), alpha inhibiting activity polypeptide 2b	134.7	1185.71	116.5	0.401293	0.202378	1.98289	0.04738	0.619827	189	158	131	134	156	123	98	89
eryth	p<0.05		enpp2	ectonucleotide pyrophosphatase/phosphodiesterase 2	151.595	1179.42	130.5	0.390838	0.197202	1.98192	0.047488	0.619831	252	180	137	123	169	139	102	112
eryth	p<0.05		gstk1	glutathione S-transferase kappa 1	207.729	1171.16	176	0.403341	0.203482	1.9822	0.0474574	0.619831	214	152	206	385	128	182	149	245
eryth	p<0.05		sytl2b	synaptotagmin-like 2b	173.587	1438.93	158.75	0.516578	0.261011	1.97915	0.0477996	0.623014	257	104	194	200	142	49	110	334
eryth	p<0.05		rps24	ribosomal protein S24	15744	2351.16	14179.5	0.303237	0.153241	1.97883	0.0478349	0.623015	15983	11581	17412	24257	11551	13417	10015	21735
eryth	p<0.05		zgc:171772	zgc:171772	12546.1	910.842	11361	0.291117	0.147159	1.97825	0.0479009	0.623112	12883	8880	12031	21131	8536	10281	7918	18709
eryth	p<0.05		inpp5d	inositol polyphosphate-5-phosphatase D	128.523	445.25	110.75	0.418482	0.211618	1.97754	0.047981	0.623542	173	165	156	91	155	103	118	67
eryth	p<0.05		sept8b	septin 8b	8.08984	489.697	4.5	1.46588	0.741592	1.97667	0.048079	0.624356	12	10	14	10	2	8	3	5
eryth	p<0.05		rpl29	ribosomal protein L29	3453.5	657.039	3125.75	0.295568	0.149643	1.97516	0.0482501	0.624745	3499	2745	3518	5362	2381	3178	2250	4694
eryth	p<0.05		fnbp1b	formin binding protein 1b	55.2309	182.368	44	0.636603	0.32266	1.97298	0.0484975	0.626975	50	107	75	33	41	49	73	13
eryth	p<0.05		reep3a	receptor accessory protein 3a	199.947	220.75	175.25	0.348483	0.176604	1.97325	0.048467	0.626975	206	219	223	250	175	174	177	175
eryth	p<0.05		slc12a8	solute carrier family 12, member 8	41.9578	241.355	32.75	0.634681	0.322549	1.96771	0.0491018	0.632074	39	58	62	46	25	37	41	28
eryth	p<0.05		gstz1	glutathione S-transferase zeta 1	194.831	257	171	0.41287	0.209917	1.96683	0.0492033	0.632552	193	174	203	304	117	193	109	265
eryth	p<0.05		bcl11ba	B-cell CLL/lymphoma 11Ba (zinc finger protein)	686.358	414.026	632	0.267731	0.136203	1.96568	0.0493356	0.633242	320	754	904	985	244	589	752	943
eryth	p<0.05		csf3r	colony stimulating factor 3 receptor (granulocyte)	42.1951	1058.59	32.75	0.704184	0.35847	1.96442	0.0494819	0.634659	39	66	57	45	36	45	39	11
eryth	p<0.05		tomm20b	translocase of outer mitochondrial membrane 20b	897.631	1246.33	804.25	0.280284	0.142877	1.96172	0.0497954	0.636457	972	723	827	1443	666	764	694	1093
eryth	p<0.05		eif4a2	eukaryotic translation initiation factor 4A, isoform 2	747.309	331.934	673	0.258503	0.131921	1.95953	0.0500512	0.638401	1249	451	510	1076	954	414	433	891
eryth	p<0.05		QRFPR	#N/A	3.41175	294.645	0.25	4.37538	1.45546	3.00618	0.00264549	NA	14	5	5	3	0	0	0	1
eryth	p<0.05		dscama	Down syndrome cell adhesion molecule a	3.44479	331.908	0.25	4.31293	1.44912	2.97624	0.00291805	NA	14	5	2	5	0	0	1	0
eryth	p<0.05		si:zfos-367g9	#N/A	2.88056	475.461	0.5	3.83744	1.4752	2.6013	0.00928712	NA	4	5	5	7	0	2	0	0
eryth	p<0.05		si:dkeyp-71f10	#N/A	2.66657	2352.11	0.5	3.4968	1.51427	2.30923	0.020931	NA	3	7	2	7	2	0	0	0
eryth	p<0.05		si:dkey-6n6	#N/A	3.67944	307.408	0.75	3.2501	1.30906	2.48278	0.0130363	NA	18	3	3	3	1	0	2	0
eryth	p<0.05		egf	epidermal growth factor	2.94795	345.487	0.75	3.02784	1.48795	2.0349	0.0418606	NA	3	10	8	0	0	3	0	0
eryth	p<0.05		jac1	#N/A	2.94396	1249.34	0.75	3.0121	1.37343	2.19312	0.0282988	NA	4	9	7	1	2	1	0	0
eryth	p<0.05		gpr17	G protein-coupled receptor 17	3.87497	393.987	1	2.97066	1.19107	2.49412	0.0126271	NA	7	9	4	7	1	2	0	1
eryth	p<0.05		si:dkey-17e16	#N/A	3.37704	344.671	1.25	3.10733	1.36501	2.27641	0.0228214	NA	11	4	4	3	5	0	0	0
eryth	p<0.05		CR376783	#N/A	3.92322	388.842	1.75	2.15881	1.09047	1.9797	0.0477372	NA	6	6	8	6	2	3	2	0
xan	q<0.05	***	bco1	beta-carotene oxygenase 1	652.992	273.882	1160	-3.01216	0.16275	-18.508	1.78063e-76	3.15172e-72	203	151	107	123	1451	957	1137	1095
xan	q<0.05		gapdh	glyceraldehyde-3-phosphate dehydrogenase	163.859	938.447	316.5	-4.81606	0.298605	-16.1285	1.60873e-58	7.11863e-55	8	14	9	14	412	406	236	212
xan	q<0.05		thbs4a	thrombospondin 4a	2859.69	1282.76	4683.75	-2.24115	0.155648	-14.3988	5.26204e-47	1.86276e-43	754	1714	1080	594	5219	6260	4220	3036
xan	q<0.05		gstt1a	glutathione S-transferase theta 1a	131.891	1867.13	249.25	-4.07771	0.289757	-14.0729	5.57731e-45	1.64531e-41	19	16	10	14	204	249	232	312
xan	q<0.05		krt93	keratin 93	3097.98	276.026	5087	-2.32015	0.173515	-13.3714	8.88426e-41	2.24645e-37	426	1496	985	1529	3586	5090	4993	6679
xan	q<0.05		krt97	keratin 97	17793.2	989.776	26436.8	-1.49473	0.113444	-13.1759	1.20831e-39	2.67338e-36	10806	5487	8139	12167	31704	14083	21634	38326
xan	q<0.05		si:ch211-156l18	#N/A	118.621	1238.03	213	-3.13637	0.265487	-11.8137	3.31814e-32	5.80678e-29	23	25	18	31	291	168	155	238
xan	q<0.05		krt96	keratin 96	652.651	1269.2	1000	-1.67823	0.142143	-11.8066	3.60874e-32	5.80678e-29	337	175	312	398	1247	491	926	1336
xan	q<0.05		krt94	keratin 94	18548.8	862.579	26980.2	-1.48389	0.129516	-11.4573	2.16258e-30	2.94443e-27	4234	12057	8545	15633	15247	28044	24184	40446
xan	q<0.05		tgm1l4	transglutaminase 1 like 4	105.365	394.276	194.25	-3.68888	0.327484	-11.2643	1.96903e-29	2.48942e-26	39	8	10	9	275	132	138	232
xan	q<0.05		cilp	cartilage intermediate layer protein, nucleotide pyrophosphohydrolase	261.733	219.132	431.5	-2.19743	0.197935	-11.1018	1.22972e-28	1.45107e-25	124	106	89	48	434	594	522	176
xan	q<0.05		malb	#N/A	135.831	163.882	228	-2.5798	0.256783	-10.0466	9.51029e-24	9.35178e-21	21	28	20	106	196	201	114	401
xan	q<0.05		sncga	synuclein, gamma a	181.072	163.5	296.75	-2.22741	0.225574	-9.87442	5.37453e-23	4.75646e-20	100	48	56	57	299	335	271	282
xan	q<0.05	***	aox5	aldehyde oxidase 5	249.64	557.487	396.25	-1.9117	0.217279	-8.79837	1.38823e-18	1.02382e-15	96	124	85	108	562	371	397	255
xan	q<0.05		tgm1l3	transglutaminase 1 like 3	258.985	652.158	501.5	-5.34672	0.612654	-8.72714	2.61183e-18	1.84918e-15	41	14	6	4	592	469	401	544
xan	q<0.05		fosab	v-fos FBJ murine osteosarcoma viral oncogene homolog Ab	1761.34	437.303	2533.25	-1.46476	0.169865	-8.62311	6.51574e-18	4.43571e-15	444	171	928	2415	956	575	3760	4842
xan	q<0.05		abl2	c-abl oncogene 2, non-receptor tyrosine kinase	1563.7	604.947	2081.75	-1.00229	0.120053	-8.34873	6.89993e-17	4.52329e-14	788	1375	1011	1009	1737	2686	1983	1921
xan	q<0.05	***	scarb1	scavenger receptor class B, member 1	758.54	565.5	1024.75	-1.05929	0.129383	-8.18722	2.67337e-16	1.68995e-13	562	488	473	447	1124	992	1036	947
xan	q<0.05		thbs4b	thrombospondin 4b	1012.18	471.737	1375.75	-1.10201	0.135373	-8.14057	3.93409e-16	2.32111e-13	547	745	791	513	1263	1514	1450	1276
xan	q<0.05		pla2g4f.2	phospholipase A2, group IVF, tandem duplicate 2	568.501	361.526	783.25	-1.14858	0.141555	-8.11402	4.89736e-16	2.79624e-13	328	334	393	360	782	787	749	815
xan	q<0.05		krt95	kertain 95	488.239	335.145	939.25	-5.63641	0.698284	-8.0718	6.92701e-16	3.8315e-13	121	19	4	5	1995	571	427	764
xan	q<0.05	***	bco2b	beta-carotene oxygenase 2b	333.259	344.934	530.5	-1.74195	0.225913	-7.71073	1.251e-14	6.32649e-12	109	197	73	165	287	1236	264	335
xan	q<0.05		hpgd	hydroxyprostaglandin dehydrogenase 15-(NAD)	617.469	1220.83	835.25	-1.06118	0.138782	-7.64637	2.06731e-14	9.88955e-12	370	378	357	493	896	762	681	1002
xan	q<0.05		tmem130	transmembrane protein 130	41.0914	460.868	74.5	-3.33288	0.436862	-7.62914	2.36325e-14	1.10078e-11	10	4	6	10	96	93	48	61
xan	q<0.05		angptl7	angiopoietin-like 7	361.53	466.75	509.75	-1.20201	0.16527	-7.27298	3.51636e-13	1.48189e-10	439	135	182	97	1137	342	337	223
xan	q<0.05		tuba1b	tubulin, alpha 1b	526.886	411.908	717.75	-1.06652	0.147543	-7.22854	4.88211e-13	2.00961e-10	492	336	267	249	1159	636	487	589
xan	q<0.05		KYAT3	#N/A	254.686	677.605	359.5	-1.28415	0.17864	-7.18847	6.55192e-13	2.63566e-10	129	122	124	224	351	367	257	463
xan	q<0.05		dclk1a	doublecortin-like kinase 1a	41.9083	666.092	74.25	-2.96713	0.41867	-7.08702	1.37026e-12	5.05282e-10	11	5	14	8	99	48	64	86
xan	q<0.05		tgm1l2	transglutaminase 1 like 2	5041.78	339.487	9705.75	-5.92646	0.838602	-7.06706	1.58249e-12	5.71633e-10	1220	202	68	22	17987	6417	6672	7747
xan	q<0.05		dlx4a	distal-less homeobox 4a	150.152	360.579	219.25	-1.47614	0.216047	-6.83252	8.34351e-12	2.78642e-09	151	65	59	49	353	154	172	198
xan	q<0.05		oacyl	O-acyltransferase like	149.461	285.513	292.75	-6.80872	1.01017	-6.74017	1.58198e-11	5.0911e-09	0	2	2	22	246	212	321	392
xan	q<0.05		gmds	GDP-mannose 4,6-dehydratase	2072.29	713.487	2601.25	-0.741129	0.115899	-6.39461	1.60953e-10	4.8286e-08	818	1585	1411	2357	1345	2748	2227	4085
xan	q<0.05		angptl2b	angiopoietin-like 2b	243.823	213.671	335.5	-1.12246	0.176778	-6.34954	2.15957e-10	6.37074e-08	141	173	158	138	312	442	276	312
xan	q<0.05		ogna	#N/A	342.558	410.816	484.5	-1.3687	0.220271	-6.21369	5.17562e-10	1.50178e-07	122	215	335	131	399	511	466	562
xan	q<0.05		nkx3-1	NK3 homeobox 1	502.681	336.855	667.25	-0.9178	0.150111	-6.11415	9.70749e-10	2.67012e-07	245	226	236	645	519	355	420	1375
xan	q<0.05		dlx3b	distal-less homeobox 3b	2175.69	628.105	2700.25	-0.702514	0.11493	-6.11254	9.80552e-10	2.67012e-07	1562	1183	1776	2082	2598	1863	2789	3551
xan	q<0.05		sox3	SRY (sex determining region Y)-box 3	1276.28	555.263	1671.5	-0.900057	0.149005	-6.04044	1.53692e-09	4.12173e-07	812	738	850	1124	1937	1035	1818	1896
xan	q<0.05		slc38a2	solute carrier family 38, member 2	804.144	494.5	1069.25	-0.907414	0.150322	-6.03647	1.57523e-09	4.16143e-07	896	647	319	294	2032	1169	667	409
xan	q<0.05		fn1b	fibronectin 1b	3629.26	386.697	4716.5	-0.918262	0.152296	-6.02945	1.64523e-09	4.28242e-07	2160	3563	2847	1598	3461	6194	4562	4649
xan	q<0.05		GGH	gamma-glutamyl hydrolase (conjugase, folylpolygammaglutamyl hydrolase)	102.708	348.908	163.25	-1.70683	0.283466	-6.02129	1.73032e-09	4.43865e-07	60	35	36	38	376	100	94	83
xan	q<0.05		gldc	glycine dehydrogenase (decarboxylating)	2603.04	485.974	3227	-0.717961	0.119362	-6.01501	1.7988e-09	4.5484e-07	2823	1692	1954	1449	4292	2561	3385	2670
xan	q<0.05		sp9	sp9 transcription factor	164.81	278.421	237.75	-1.42164	0.237334	-5.99002	2.09811e-09	5.2305e-07	42	104	151	71	158	169	338	286
xan	q<0.05		ppm1nb	protein phosphatase, Mg2+/Mn2+ dependent, 1Nb (putative)	26.3501	293.316	46.75	-3.02237	0.504982	-5.98511	2.16238e-09	5.31586e-07	8	8	3	4	34	68	47	38
xan	q<0.05		klf5b	Kruppel-like factor 5b	49.4783	274.789	80.5	-2.10796	0.353356	-5.96553	2.43834e-09	5.91214e-07	33	17	19	6	137	49	80	56
xan	q<0.05		ier2b	#N/A	381.786	249.355	497.75	-0.92167	0.156338	-5.89536	3.7386e-09	8.94232e-07	330	97	350	286	548	206	734	503
xan	q<0.05		ptgs1	prostaglandin-endoperoxide synthase 1	281.854	275.711	415.75	-1.39681	0.237767	-5.87471	4.23575e-09	9.99637e-07	236	111	125	121	420	233	282	728
xan	q<0.05		cited4b	Cbp/p300-interacting transactivator, with Glu/Asp-rich carboxy-terminal domain, 4b	321.527	181.724	427	-1.00686	0.172315	-5.84314	5.12248e-09	1.17751e-06	146	219	246	253	397	413	497	401
xan	q<0.05		etv4	ets variant 4	389.832	358.026	515	-0.981038	0.168912	-5.808	6.32235e-09	1.43469e-06	142	373	321	224	290	625	534	611
xan	q<0.05		dlx4b	distal-less homeobox 4b	223.19	833.342	299	-1.00082	0.173357	-5.77319	7.77867e-09	1.74282e-06	136	113	138	202	252	227	269	448
xan	q<0.05		dlx2a	distal-less homeobox 2a	261.469	218.513	346	-0.952684	0.165181	-5.76753	8.04432e-09	1.75783e-06	115	152	169	271	217	273	339	555
xan	q<0.05		sp8a	sp8 transcription factor a	206.211	816.553	282.75	-1.11134	0.193708	-5.73718	9.62672e-09	2.05398e-06	49	136	144	191	123	214	340	454
xan	q<0.05		zgc:173729	zgc:173729	773.089	786.224	997.75	-0.85826	0.149842	-5.72776	1.01763e-08	2.12212e-06	436	540	503	714	1058	807	821	1305
xan	q<0.05		wnt11	wingless-type MMTV integration site family, member 11	264.479	881.882	350.25	-0.953529	0.170949	-5.57785	2.43512e-08	4.84288e-06	175	141	206	192	336	263	342	460
xan	q<0.05		capn2l	calpain 2, (m/II) large subunit, like	495.455	359.513	628	-0.834693	0.149743	-5.57418	2.48702e-08	4.89115e-06	173	357	369	553	389	609	593	921
xan	q<0.05		mpz	myelin protein zero	96.8634	544.987	155.25	-1.78412	0.32049	-5.56686	2.59366e-08	5.04482e-06	50	53	31	20	361	82	89	89
xan	q<0.05		otx1	#N/A	22.4024	447.342	39.5	-2.92903	0.528939	-5.53757	3.06706e-08	5.90075e-06	7	5	2	6	66	31	27	34
xan	q<0.05		si:ch211-137i24	#N/A	71.3474	603.724	104.5	-1.48258	0.268443	-5.52288	3.3349e-08	6.27955e-06	38	33	35	47	106	104	108	100
xan	q<0.05		CABZ01021592	#N/A	390.53	273.237	524.5	-1.06258	0.193871	-5.48085	4.23298e-08	7.7241e-06	234	168	261	365	497	593	408	600
xan	q<0.05		slc2a15a	solute carrier family 2 (facilitated glucose transporter), member 15a	37.8159	649.842	62.5	-2.19922	0.402102	-5.46931	4.51796e-08	8.07756e-06	17	19	11	6	93	59	80	18
xan	q<0.05		pkp1b	plakophilin 1b	1097.22	696.566	1384	-0.76924	0.141367	-5.44146	5.28455e-08	9.17025e-06	763	902	753	824	1593	1224	1409	1310
xan	q<0.05		cxcl14	chemokine (C-X-C motif) ligand 14	264.865	364.605	344	-0.911817	0.167951	-5.42907	5.66489e-08	9.73481e-06	122	184	268	169	248	350	434	344
xan	q<0.05		emx2	empty spiracles homeobox 2	208.231	354.75	276.25	-0.996402	0.18387	-5.41905	5.99163e-08	1.01973e-05	146	98	120	197	238	230	266	371
xan	q<0.05		hsd11b1la	hydroxysteroid (11-beta) dehydrogenase 1-like a	192.062	1090.24	261.75	-1.12107	0.20727	-5.40875	6.34651e-08	1.06843e-05	96	90	102	202	161	293	237	356
xan	q<0.05		kyat3	#N/A	270.102	902.434	350	-0.899467	0.166343	-5.40729	6.3985e-08	1.06843e-05	149	206	149	257	325	365	280	430
xan	q<0.05		zgc:193505	zgc:193505	3323.89	807.829	4010	-0.597721	0.111345	-5.36818	7.95361e-08	1.31569e-05	2121	2639	2321	3468	3170	3962	3442	5466
xan	q<0.05		tcirg1a	T-cell, immune regulator 1, ATPase, H+ transporting, lysosomal V0 subunit A3a	79.9183	358.605	115.75	-1.41954	0.265758	-5.34148	9.21886e-08	1.49701e-05	61	48	31	37	129	120	120	94
xan	q<0.05		col10a1b	collagen, type X, alpha 1b	5030.06	556.316	6146.25	-0.621948	0.117309	-5.30177	1.14686e-07	1.8454e-05	6011	4488	2082	3075	10596	6226	3252	4511
xan	q<0.05		acer1	alkaline ceramidase 1	28.6891	546.868	47.25	-2.29469	0.433551	-5.29279	1.20466e-07	1.92095e-05	4	12	5	19	23	51	33	82
xan	q<0.05		arg2	arginase 2	375.735	528.842	479.25	-0.814455	0.154211	-5.28144	1.28173e-07	2.02559e-05	419	117	264	290	794	221	462	440
xan	q<0.05		bscl2l	Bernardinelli-Seip congenital lipodystrophy 2, like	164.304	461.316	223	-1.08095	0.205805	-5.25232	1.50195e-07	2.35261e-05	136	115	91	80	242	227	269	154
xan	q<0.05		col11a1a	collagen, type XI, alpha 1a	839.004	486.066	1048.75	-0.787019	0.152724	-5.15322	2.56057e-07	3.90707e-05	1194	515	437	371	1748	947	623	877
xan	q<0.05		si:ch211-98n17	#N/A	493.417	395.013	613.25	-0.715706	0.141407	-5.0613	4.164e-07	6.19351e-05	301	365	368	460	538	599	547	769
xan	q<0.05		ezra	ezrin a	501.672	465.658	624	-0.756995	0.149719	-5.0561	4.27919e-07	6.31181e-05	205	484	267	562	435	723	432	906
xan	q<0.05		degs2	delta(4)-desaturase, sphingolipid 2	195.924	329.737	258	-0.924358	0.183805	-5.02902	4.92995e-07	7.21159e-05	128	123	142	144	202	236	276	318
xan	q<0.05		si:cabz01007794	#N/A	43.6841	313.947	69.25	-2.09545	0.419034	-5.00068	5.71289e-07	8.22099e-05	8	33	9	23	46	102	93	36
xan	q<0.05		pibf1	progesterone immunomodulatory binding factor 1	962.634	379.763	1169.75	-0.624369	0.1249	-4.99893	5.7648e-07	8.22879e-05	811	628	710	875	1276	976	1019	1408
xan	q<0.05		lhx9	LIM homeobox 9	103.789	522.987	144.75	-1.19724	0.239732	-4.99407	5.91207e-07	8.3715e-05	58	60	84	50	126	129	152	172
xan	q<0.05		ntd5	ntl-dependent gene 5	103.424	599.776	145.75	-1.23407	0.247881	-4.97846	6.40914e-07	9.00331e-05	53	65	76	49	116	122	152	193
xan	q<0.05		zgc:153911	zgc:153911	118.98	390.908	165.25	-1.22238	0.246645	-4.95603	7.19483e-07	0.000100274	18	12	106	154	37	35	295	294
xan	q<0.05		cmah	cytidine monophospho-N-acetylneuraminic acid hydroxylase	298.92	378.553	378.75	-0.781719	0.158117	-4.94394	7.65593e-07	0.000105867	230	153	199	294	400	242	363	510
xan	q<0.05		net1	neuroepithelial cell transforming 1	1987.23	365.474	2415.25	-0.62246	0.126223	-4.93143	8.16309e-07	0.000111144	1363	2300	1208	1367	1817	3509	1816	2519
xan	q<0.05		phlda2	pleckstrin homology-like domain, family A, member 2	554.567	385.592	695	-0.701546	0.143471	-4.88982	1.0093e-06	0.000133318	403	194	427	631	635	301	631	1213
xan	q<0.05		btg2	B-cell translocation gene 2	492.152	431.671	634.75	-0.801845	0.164942	-4.86138	1.1657e-06	0.000151713	294	199	306	599	367	343	678	1151
xan	q<0.05		entpd8	ectonucleoside triphosphate diphosphohydrolase 8	778.905	408.658	938.75	-0.683019	0.140651	-4.85612	1.19706e-06	0.000154657	1227	703	356	190	1696	1067	656	336
xan	q<0.05		aqp8a.1	aquaporin 8a, tandem duplicate 1	478.556	347.25	592.25	-0.693185	0.144217	-4.80654	1.53566e-06	0.000195548	300	390	355	414	514	558	557	740
xan	q<0.05		ccng2	cyclin G2	753.876	335.921	958.25	-0.710851	0.14871	-4.7801	1.75206e-06	0.000219939	369	534	402	892	487	786	709	1851
xan	q<0.05		prdx5	peroxiredoxin 5	1067.76	654.066	1309.75	-0.680573	0.142702	-4.7692	1.8496e-06	0.000230549	738	648	719	1198	1314	1297	952	1676
xan	q<0.05		map1sb	microtubule-associated protein 1Sb	46.2027	355.645	70.75	-1.65738	0.348046	-4.76197	1.91714e-06	0.000237297	21	21	29	15	105	70	77	31
xan	q<0.05		myoc	myocilin	259.126	1066.03	344.75	-0.973475	0.204627	-4.7573	1.96195e-06	0.000241156	134	185	254	121	231	265	469	414
xan	q<0.05		hk2	hexokinase 2	879.277	830.461	1083.5	-0.64148	0.134913	-4.75477	1.9867e-06	0.000242515	577	648	542	933	775	999	837	1723
xan	q<0.05		dusp5	dual specificity phosphatase 5	95.1001	811.974	137	-1.31368	0.27875	-4.71273	2.44418e-06	0.00029354	51	49	68	45	185	97	97	169
xan	q<0.05		lrrc17	leucine rich repeat containing 17	574.489	924.487	702.5	-0.654945	0.138999	-4.71188	2.45446e-06	0.00029354	607	409	378	392	908	706	539	657
xan	q<0.05		cckb	cholecystokinin b	33.312	1015	53.75	-1.96661	0.419422	-4.68885	2.74739e-06	0.000326368	8	16	15	13	38	29	59	89
xan	q<0.05		serpinb1l4	serpin peptidase inhibitor, clade B (ovalbumin), member 1, like 4	503.669	902.066	631.25	-0.745271	0.160563	-4.6416	3.45718e-06	0.000405246	289	301	339	574	634	525	429	937
xan	q<0.05		bcar3	breast cancer anti-estrogen resistance 3	237.053	1235.79	305.25	-0.82039	0.177511	-4.62163	3.80742e-06	0.000441675	192	145	155	183	391	201	276	353
xan	q<0.05		zgc:153665	zgc:153665	1599.44	366.368	1900.25	-0.557117	0.120561	-4.62106	3.81787e-06	0.000441675	1617	1035	1198	1345	2263	1698	1678	1962
xan	q<0.05		CABZ01044281	#N/A	1072.1	1329.21	1313	-0.66041	0.144843	-4.55948	5.12807e-06	0.000581839	540	901	934	950	944	1634	1576	1098
xan	q<0.05		smad6b	SMAD family member 6b	204.908	296.184	261	-0.852687	0.187795	-4.54053	5.61131e-06	0.000628609	84	193	117	201	196	283	212	353
xan	q<0.05		f7l	#N/A	22.0444	357.526	36	-2.24769	0.496048	-4.5312	5.86486e-06	0.000641874	14	3	7	9	45	32	30	37
xan	q<0.05		mfsd6b	major facilitator superfamily domain containing 6b	452.3	1302.26	567.75	-0.726865	0.161005	-4.51454	6.34538e-06	0.000680686	241	388	264	454	466	498	400	907
xan	q<0.05		plin6	#N/A	613.215	589.474	952	-1.68163	0.373124	-4.50688	6.57891e-06	0.000701486	201	337	336	225	1144	862	1422	380
xan	q<0.05		alx4a	ALX homeobox 4a	18.9645	1231.21	31.75	-2.40267	0.546142	-4.39936	1.08573e-05	0.0010736	3	8	9	4	24	31	26	46
xan	q<0.05		si:dkey-242g16	#N/A	337.731	1246.2	409.5	-0.742133	0.1689	-4.39392	1.11324e-05	0.00109468	111	153	190	610	237	241	341	819
xan	q<0.05		igsf5a	immunoglobulin superfamily, member 5a	471.149	762.724	573.25	-0.629699	0.144165	-4.3679	1.25448e-05	0.00122676	310	409	357	401	448	590	628	627
xan	q<0.05		grhl3	grainyhead-like transcription factor 3	961.675	1508.54	1163.75	-0.629505	0.144272	-4.36333	1.28097e-05	0.00124577	582	674	857	925	1211	945	1197	1302
xan	q<0.05		prss60	#N/A	104.52	1122.45	150	-1.27311	0.29336	-4.33976	1.42641e-05	0.00137214	47	54	82	53	257	127	112	104
xan	q<0.05		col12a1a	collagen, type XII, alpha 1a	6592.11	503.368	7696.25	-0.496003	0.11459	-4.3285	1.5013e-05	0.00142102	6854	4522	4302	6272	9011	7277	5803	8694
xan	q<0.05		zgc:194948	zgc:194948	549.536	1194.97	673.5	-0.648229	0.150866	-4.29671	1.73355e-05	0.00163212	211	321	310	860	357	586	380	1371
xan	q<0.05		gphb5	glycoprotein hormone beta 5	6.09833	1160.83	12.25	-5.56972	1.31551	-4.23389	2.29687e-05	0.00211743	0	0	0	0	9	2	15	23
xan	q<0.05		arl4d	ADP-ribosylation factor-like 4D	455.083	1159.39	552.75	-0.625398	0.147756	-4.23263	2.30971e-05	0.00211823	357	181	280	613	532	321	378	980
xan	q<0.05		sox19a	SRY (sex determining region Y)-box 19a	144.32	1239.29	189	-0.974223	0.231773	-4.20335	2.6299e-05	0.00237496	56	29	100	214	179	53	148	376
xan	q<0.05		tbx2b	T-box 2b	86.1298	1237.2	116.25	-1.04846	0.250057	-4.19287	2.7545e-05	0.00246236	60	54	72	38	94	131	157	83
xan	q<0.05		dpt	dermatopontin	124.41	1240.63	163.5	-0.92205	0.220217	-4.18701	2.82656e-05	0.00250151	122	81	57	82	255	116	130	153
xan	q<0.05		cilp2	cartilage intermediate layer protein 2	83.6156	264.961	113.75	-1.0829	0.258906	-4.18258	2.88217e-05	0.00253379	34	90	68	23	86	204	121	44
xan	q<0.05		si:ch211-226h7	#N/A	4504.46	1744.8	5407	-0.56202	0.134396	-4.18183	2.89167e-05	0.00253379	2618	4169	5364	2255	3386	5003	9214	4025
xan	q<0.05		klf17	Kruppel-like factor 17	266.718	309.974	327.5	-0.671937	0.161147	-4.16972	3.04971e-05	0.00265597	191	205	159	268	309	327	255	419
xan	q<0.05		esyt3	extended synaptotagmin-like protein 3	663.596	268.526	790.75	-0.579822	0.139084	-4.16887	3.06112e-05	0.00265597	341	631	586	589	593	817	878	875
xan	q<0.05		col4a5	collagen, type IV, alpha 5 (Alport syndrome)	545.19	283.329	656	-0.580612	0.140104	-4.14416	3.41057e-05	0.00293044	569	396	442	330	881	582	724	437
xan	q<0.05		cyb561a3b	cytochrome b561 family, member A3b	9.95848	267.355	18.75	-4.10302	0.995816	-4.12026	3.78445e-05	0.00317463	0	0	1	4	9	34	10	22
xan	q<0.05		mmp11a	matrix metallopeptidase 11a	51.1888	314.079	78	-1.50095	0.365908	-4.10199	4.09614e-05	0.00341902	39	24	19	14	159	32	90	31
xan	q<0.05		junbb	jun B proto-oncogene b	1183.71	626.434	1415.25	-0.552904	0.134823	-4.10096	4.11441e-05	0.00341902	1117	607	991	1093	1655	813	1797	1396
xan	q<0.05		tnika	TRAF2 and NCK interacting kinase a	1281.76	305.342	1505.5	-0.544922	0.133932	-4.06864	4.7288e-05	0.0039112	590	1491	1088	1064	985	1767	1751	1519
xan	q<0.05		dspa	desmoplakin a	13045.2	913.579	15344.5	-0.521906	0.12831	-4.06755	4.75097e-05	0.00391127	8859	12727	10638	10760	15209	14916	17176	14077
xan	q<0.05		si:ch211-153b23	#N/A	166.029	395.263	218	-0.913334	0.227498	-4.01469	5.95249e-05	0.00483298	92	136	134	94	294	248	180	150
xan	q<0.05		lmo4b	LIM domain only 4b	78.2634	189.434	105.75	-1.08058	0.270241	-3.99859	6.37217e-05	0.00515011	67	56	43	37	96	105	117	105
xan	q<0.05		epha2a	eph receptor A2 a	440.695	316.645	538.25	-0.635872	0.159779	-3.9797	6.90011e-05	0.00549684	402	174	454	343	656	258	559	680
xan	q<0.05		scel	sciellin	625.386	524.829	773.5	-0.654472	0.165208	-3.9615	7.44801e-05	0.0058591	530	508	455	417	1073	658	544	819
xan	q<0.05		jdp2b	Jun dimerization protein 2b	272.846	202.118	363.75	-0.838484	0.211748	-3.95981	7.50083e-05	0.00587454	65	38	106	519	74	57	277	1047
xan	q<0.05		klf5l	#N/A	1030.72	317.461	1217	-0.55139	0.139284	-3.95875	7.53439e-05	0.00587455	1132	895	715	636	1329	1349	1048	1142
xan	q<0.05		bambia	BMP and activin membrane-bound inhibitor (Xenopus laevis) homolog a	163.186	259.039	213	-0.850823	0.215285	-3.95208	7.7476e-05	0.00598832	119	113	113	111	274	138	182	258
xan	q<0.05		dlx1a	distal-less homeobox 1a	61.356	157.421	84.5	-1.15219	0.292921	-3.93346	8.37326e-05	0.00641587	48	46	39	20	80	114	77	67
xan	q<0.05		acvrl1	activin A receptor type II-like 1	313.588	450.855	385	-0.667755	0.169891	-3.93049	8.47724e-05	0.00646755	244	269	208	247	414	324	401	401
xan	q<0.05		mcama	melanoma cell adhesion molecule a	69.6741	286.382	95.5	-1.12433	0.286791	-3.92039	8.84067e-05	0.00671588	28	56	58	34	68	78	125	111
xan	q<0.05		emx3	empty spiracles homeobox 3	261.669	337.092	321.25	-0.649114	0.165986	-3.91065	9.20482e-05	0.00696262	204	156	209	238	310	234	305	436
xan	q<0.05		col6a4a	collagen, type VI, alpha 4a	752.82	461.895	904.25	-0.568032	0.145315	-3.90897	9.26919e-05	0.00698148	620	668	630	488	1193	941	807	676
xan	q<0.05		zgc:113307	zgc:113307	17.051	442.934	27.75	-2.19207	0.561126	-3.90656	9.36205e-05	0.00702154	14	3	4	5	34	14	25	38
xan	q<0.05		arl4cb	ADP-ribosylation factor-like 4Cb	860.22	479.711	1010.25	-0.517612	0.132718	-3.90009	9.61584e-05	0.00718145	751	519	491	1081	940	739	807	1555
xan	q<0.05		spire1a	spire-type actin nucleation factor 1a	501.658	308.671	608.25	-0.636095	0.16321	-3.89741	9.72281e-05	0.00723083	520	487	289	285	865	544	566	458
xan	q<0.05		rtn1b	reticulon 1b	249.753	170.342	312	-0.722532	0.185539	-3.89424	9.85069e-05	0.00726488	231	169	191	159	319	283	267	379
xan	q<0.05		sigirr	single immunoglobulin and toll-interleukin 1 receptor (TIR) domain	139.436	446.526	176.75	-0.807207	0.207789	-3.88475	0.000102436	0.00752331	121	88	95	102	174	187	180	166
xan	q<0.05		gale	UDP-galactose-4-epimerase	301.401	340.803	365	-0.615047	0.159956	-3.8451	0.000120504	0.0087415	223	207	212	310	358	352	283	467
xan	q<0.05		junba	jun B proto-oncogene a	1007.95	550.329	1206.25	-0.526199	0.136987	-3.84124	0.000122414	0.00884377	538	772	1037	891	690	995	1851	1289
xan	q<0.05		jag1b	jagged 1b	1091.13	325.053	1278.5	-0.499413	0.130723	-3.8204	0.000133234	0.00943296	418	1185	894	1117	595	1427	1306	1786
xan	q<0.05		slc20a2	solute carrier family 20 (phosphate transporter), member 2	1035.64	299.526	1244.25	-0.578113	0.151734	-3.81005	0.000138938	0.00979764	648	1033	804	824	893	1136	1462	1486
xan	q<0.05		ncs1a	neuronal calcium sensor 1a	21.0669	346.105	32.5	-1.93378	0.5096	-3.79469	0.000147825	0.010383	2	11	8	16	25	26	25	54
xan	q<0.05		cyp2r1	cytochrome P450, family 2, subfamily R, polypeptide 1	37.7283	346.908	54	-1.36967	0.361183	-3.79217	0.000149335	0.0104064	37	22	11	16	70	69	32	45
xan	q<0.05		hmcn1	hemicentin 1	171.584	390.224	221.25	-0.899539	0.237187	-3.79253	0.00014912	0.0104064	179	107	138	63	229	158	261	237
xan	q<0.05		myh7bb	myosin, heavy chain 7B, cardiac muscle, beta b	9.82502	263.421	17.5	-2.88345	0.761451	-3.78678	0.000152612	0.0105433	3	1	3	3	18	14	15	23
xan	q<0.05		clic3	chloride intracellular channel 3	599.835	172.316	710.75	-0.524145	0.138407	-3.78699	0.000152483	0.0105433	473	544	392	546	725	832	486	800
xan	q<0.05		rgs16	regulator of G-protein signaling 16	7.30713	438.75	14	-4.09292	1.08701	-3.76528	0.000166361	0.0113403	1	1	1	0	11	14	9	22
xan	q<0.05		aspn	asporin (LRR class 1)	234.364	391.145	297	-0.727845	0.193348	-3.76444	0.000166922	0.0113403	203	208	150	127	361	429	165	233
xan	q<0.05		serpine1	serpin peptidase inhibitor, clade E (nexin, plasminogen activator inhibitor type 1), member 1	904.531	260.816	1056	-0.502474	0.133556	-3.76227	0.000168377	0.0113403	1040	821	636	515	1382	1135	825	882
xan	q<0.05		ptgs2a	prostaglandin-endoperoxide synthase 2a	1022.72	333.539	1220	-0.5269	0.140013	-3.76322	0.000167742	0.0113403	734	787	596	1185	812	1231	912	1925
xan	q<0.05		nos2a	nitric oxide synthase 2a, inducible	1155.43	567.197	1387.75	-0.590334	0.157127	-3.75704	0.000171935	0.0115275	530	917	748	1498	838	988	1564	2161
xan	q<0.05		tmeff2b	transmembrane protein with EGF-like and two follistatin-like domains 2b	94.5571	301.513	122.5	-0.906875	0.242203	-3.74427	0.000180918	0.012084	80	39	62	86	156	97	93	144
xan	q<0.05		barx1	BARX homeobox 1	10.3153	664.382	18	-2.85591	0.765883	-3.72891	0.000192311	0.0127011	5	1	3	1	36	10	12	14
xan	q<0.05		fgf16	fibroblast growth factor 16	41.6301	1227.33	60	-1.27152	0.342944	-3.70767	0.000209171	0.0136115	31	19	16	28	81	35	35	89
xan	q<0.05		dynll1	dynein, light chain, LC8-type 1	542.88	1340.04	647.75	-0.522114	0.140982	-3.7034	0.000212727	0.0137922	722	320	254	457	1163	423	349	656
xan	q<0.05		tmem176l.4	transmembrane protein 176l.4	222.448	1954.72	269.25	-0.635565	0.172026	-3.69459	0.000220244	0.0142274	118	164	145	276	187	243	247	400
xan	q<0.05		spon1b	spondin 1b	420.566	1174.26	500.25	-0.537876	0.146304	-3.67642	0.00023653	0.0150596	492	297	269	305	772	393	403	433
xan	q<0.05		her7	hairy and enhancer of split related-7	7.1534	1932.09	14	-4.50945	1.22757	-3.67347	0.000239282	0.0151803	0	1	1	0	14	9	13	20
xan	q<0.05		sox6	SRY (sex determining region Y)-box 6	201.58	1937.21	257.25	-0.860158	0.234518	-3.66777	0.000244677	0.0154121	118	220	130	116	282	197	293	257
xan	q<0.05		anxa3a	annexin A3a	651.76	1879.43	777	-0.520523	0.14213	-3.6623	0.000249962	0.0156891	456	531	465	656	589	723	629	1167
xan	q<0.05		sox19b	SRY (sex determining region Y)-box 19b	159.608	681.776	198	-0.72149	0.197328	-3.65629	0.000255892	0.0159482	48	113	155	168	88	164	285	255
xan	q<0.05		ube2ql1	ubiquitin-conjugating enzyme E2Q family-like 1	15.5683	739.184	25.25	-2.29292	0.628203	-3.64996	0.000262282	0.0162891	16	5	4	0	41	25	32	3
xan	q<0.05		atp1b3a	ATPase, Na+/K+ transporting, beta 3a polypeptide	1104.56	1234.86	1288.75	-0.47299	0.130241	-3.63166	0.000281602	0.0173068	944	542	854	1341	1146	830	1109	2070
xan	q<0.05		fgfrl1a	fibroblast growth factor receptor-like 1a	166.4	1166.08	205.25	-0.687453	0.189397	-3.62969	0.000283759	0.017379	175	114	98	123	289	178	174	180
xan	q<0.05		gdpd2	glycerophosphodiester phosphodiesterase domain containing 2	634.624	1823.93	750.25	-0.514689	0.141955	-3.62571	0.000288167	0.0175881	666	472	466	471	1038	624	766	573
xan	q<0.05		si:ch211-69b7	#N/A	2376.72	761.987	2814	-0.534108	0.147573	-3.61929	0.000295416	0.0179686	1739	2555	1814	1649	3433	2914	2892	2017
xan	q<0.05		tmem45b	transmembrane protein 45B	277.395	1996.7	330.25	-0.596445	0.16508	-3.61308	0.000302584	0.0183415	101	247	220	330	175	367	345	434
xan	q<0.05		si:dkey-73n8	#N/A	318.216	1486.08	390	-0.661891	0.184299	-3.5914	0.000328912	0.0196681	323	205	229	228	422	492	352	294
xan	q<0.05		lef1	lymphoid enhancer-binding factor 1	260.381	1719.18	315.25	-0.62357	0.175507	-3.55296	0.000380919	0.0224742	204	255	194	169	348	313	278	322
xan	q<0.05		slc6a7	#N/A	516.051	1136.92	615	-0.552872	0.155712	-3.55059	0.000384365	0.0226022	329	540	465	335	498	625	861	476
xan	q<0.05		col17a1b	collagen, type XVII, alpha 1b	10009.9	1472.24	11582.2	-0.476122	0.13427	-3.546	0.000391122	0.0229234	5466	10048	9475	8761	9696	11873	14601	10159
xan	q<0.05		phgdh	phosphoglycerate dehydrogenase	188.296	744.474	234	-0.668382	0.189228	-3.53215	0.000412194	0.0240787	117	143	134	177	163	251	181	341
xan	q<0.05		scinlb	scinderin like b	4309.71	732.013	4900.5	-0.417253	0.119097	-3.50348	0.00045923	0.0264768	2098	3966	3701	5111	2964	4956	5622	6060
xan	q<0.05		si:dkey-56e3	#N/A	778.85	442.276	902.75	-0.456909	0.130489	-3.50152	0.000462621	0.0265857	690	553	536	840	926	830	671	1184
xan	q<0.05		fibinb	fin bud initiation factor b	545.686	527.513	637.5	-0.50933	0.145791	-3.49356	0.000476627	0.0273019	533	514	484	284	735	702	612	501
xan	q<0.05		map7d2b	MAP7 domain containing 2b	24.0778	378.711	35.75	-1.4909	0.42876	-3.47724	0.000506605	0.0289255	13	11	11	16	42	35	27	39
xan	q<0.05		creb3l1	cAMP responsive element binding protein 3-like 1	169.419	518.592	206.5	-0.672986	0.193636	-3.47553	0.000509845	0.0290169	96	176	96	163	169	263	181	213
xan	q<0.05		mala	#N/A	291.038	269.355	346.75	-0.581301	0.167519	-3.47006	0.000520338	0.0292381	302	177	184	278	366	287	320	414
xan	q<0.05		slc6a15	solute carrier family 6 (neutral amino acid transporter), member 15	5.27849	283.316	10.25	-4.28653	1.238	-3.46245	0.000535274	0.0299157	0	2	0	0	8	14	16	3
xan	q<0.05		capn9	calpain 9	1475.59	395.224	1677.25	-0.416861	0.120614	-3.45615	0.000547958	0.0304996	804	1533	1053	1704	1142	2019	1466	2082
xan	q<0.05		nceh1a	neutral cholesterol ester hydrolase 1a	319.288	641.632	380.25	-0.566657	0.164345	-3.44796	0.000564831	0.0310493	232	240	206	356	401	294	345	481
xan	q<0.05		traf4a	tnf receptor-associated factor 4a	298.236	192.276	354.5	-0.550854	0.160036	-3.44206	0.000577312	0.031636	260	217	205	287	332	350	309	427
xan	q<0.05		dkk1b	dickkopf WNT signaling pathway inhibitor 1b	10.3928	839.855	17.75	-2.69639	0.784332	-3.43782	0.000586417	0.0319372	4	0	8	1	31	9	15	16
xan	q<0.05		sec23b	Sec23 homolog B, COPII coat complex component	1302.74	1331.3	1492	-0.424239	0.123483	-3.4356	0.000591254	0.0321018	1115	919	1088	1331	1674	1208	1455	1631
xan	q<0.05		cygb1	cytoglobin 1	238.412	304.355	291.75	-0.628938	0.185362	-3.39303	0.00069125	0.0367421	202	229	165	144	421	303	213	230
xan	q<0.05		cntfr	ciliary neurotrophic factor receptor	201.27	304.855	242	-0.630473	0.18663	-3.3782	0.000729623	0.038208	275	130	134	103	362	194	206	206
xan	q<0.05		dusp1	dual specificity phosphatase 1	737.377	316.368	932	-0.675603	0.200677	-3.36662	0.000760954	0.0397312	334	398	526	915	531	413	1585	1199
xan	q<0.05		nrarpa	notch-regulated ankyrin repeat protein a	556.09	325.842	659.5	-0.504168	0.14992	-3.36291	0.000771252	0.0401505	605	301	451	454	851	348	629	810
xan	q<0.05		zgc:153932	zgc:153932	834.96	459.197	1003.75	-0.52072	0.155104	-3.35723	0.00078728	0.0407452	450	815	1060	340	694	875	1986	460
xan	q<0.05		sall1a	spalt-like transcription factor 1a	135.179	1713.78	171.25	-0.790783	0.236994	-3.33672	0.000847724	0.0431708	87	130	114	67	231	150	165	139
xan	q<0.05		hbegfa	heparin-binding EGF-like growth factor a	377.366	1742.11	441	-0.492237	0.147425	-3.33889	0.000841132	0.0431708	293	206	286	470	418	297	387	662
xan	q<0.05		adipor2	adiponectin receptor 2	2212.84	1394.86	2501.75	-0.37874	0.113437	-3.33876	0.000841525	0.0431708	1828	2278	1855	1735	2387	2958	2433	2229
xan	q<0.05		mstnb	myostatin b	94.4013	1500.29	150.25	-2.00359	0.602481	-3.32557	0.000882381	0.0445302	55	47	47	6	272	200	58	71
xan	q<0.05		ccl44	chemokine (C-C motif) ligand 44	59.5703	2365.04	79.25	-0.982312	0.295693	-3.32207	0.000893515	0.0449296	58	28	32	41	113	82	47	75
xan	q<0.05		foxq1a	forkhead box Q1a	906.587	1521.61	1030.75	-0.469265	0.141307	-3.32089	0.000897318	0.044993	64	1075	945	1046	117	1447	1261	1298
xan	q<0.05		ccn2a	#N/A	811.663	521.447	967	-0.516469	0.15575	-3.31602	0.000913106	0.0456553	707	500	848	570	1452	646	1047	723
xan	q<0.05		serpinb1l1	serpin peptidase inhibitor, clade B (ovalbumin), member 1, like 1	319.059	501.408	380	-0.534635	0.161777	-3.30478	0.000950523	0.0472592	218	257	263	294	319	325	355	521
xan	p<0.05		fosl2	fos-like antigen 2	496.256	496.671	598.25	-0.565038	0.172212	-3.28107	0.00103414	0.0504252	676	321	401	179	1134	325	573	361
xan	p<0.05		si:dkey-193p11	#N/A	7803.26	1793.89	8992.25	-0.429127	0.130969	-3.27654	0.00105086	0.0510995	3226	4091	6670	12469	4263	6716	7003	17987
xan	p<0.05		si:ch73-335l21	#N/A	999.068	1558.61	1187	-0.536504	0.164013	-3.27112	0.00107124	0.0519479	868	449	611	1316	988	564	1366	1830
xan	p<0.05		lpcat4	lysophosphatidylcholine acyltransferase 4	451.645	1339.07	525.25	-0.484661	0.149022	-3.25227	0.00114486	0.0550652	552	229	287	445	720	374	352	655
xan	p<0.05		esrp1	epithelial splicing regulatory protein 1	2600.55	673.618	2937.75	-0.370728	0.113983	-3.25249	0.00114397	0.0550652	1863	2151	2120	2919	2440	2844	2553	3914
xan	p<0.05		zgc:153115	zgc:153115	189.595	1326.12	228.75	-0.607237	0.186823	-3.25034	0.00115267	0.0552909	215	103	144	140	298	152	271	194
xan	p<0.05		ckap4	#N/A	364.076	1331.16	432.25	-0.502361	0.154681	-3.24772	0.00116332	0.0555009	244	225	223	491	299	328	309	793
xan	p<0.05		elovl1a	ELOVL fatty acid elongase 1a	303.861	1733.74	364.5	-0.544467	0.168321	-3.23471	0.00121768	0.0577828	325	180	233	235	569	262	269	358
xan	p<0.05		fosl1a	FOS-like antigen 1a	52.448	634.961	69.75	-1.13377	0.350604	-3.23377	0.00122169	0.0578179	30	10	75	24	108	26	85	60
xan	p<0.05		perp	PERP, TP53 apoptosis effector	6535.17	1835.83	7319.75	-0.35189	0.108896	-3.23144	0.0012317	0.058136	4352	5431	5640	7580	5666	7174	6944	9495
xan	p<0.05		adka	adenosine kinase a	2487.37	1284.64	2833	-0.385474	0.119345	-3.2299	0.00123832	0.0582934	1362	3245	2123	1836	1732	4365	3100	2135
xan	p<0.05		tm9sf5	transmembrane 9 superfamily protein member 5	598.449	569.303	696.5	-0.460727	0.143033	-3.22113	0.00127687	0.0596797	515	492	535	460	763	635	852	536
xan	p<0.05		ivns1abpa	influenza virus NS1A binding protein a	2471.39	1349.24	2796	-0.381993	0.118598	-3.2209	0.00127789	0.0596797	2092	2346	2053	2096	2696	2721	2958	2809
xan	p<0.05		sema6dl	sema domain, transmembrane domain (TM), and cytoplasmic domain, (semaphorin) 6D, like	249.59	366.513	299	-0.556407	0.172813	-3.2197	0.00128325	0.0597725	136	207	252	205	190	273	352	381
xan	p<0.05		pitpnaa	phosphatidylinositol transfer protein, alpha a	1315.89	526.684	1505	-0.398029	0.123794	-3.21525	0.00130332	0.0603894	879	1250	1063	1316	1062	1694	1327	1937
xan	p<0.05		slc6a11a	solute carrier family 6 (neurotransmitter transporter), member 11a	134.414	456.658	163	-0.743301	0.231277	-3.2139	0.00130944	0.0605147	239	84	75	25	324	155	101	72
xan	p<0.05		dkk3b	dickkopf WNT signaling pathway inhibitor 3b	66.3968	443.645	88	-0.934403	0.291151	-3.20934	0.0013304	0.0610506	39	60	46	35	80	114	54	104
xan	p<0.05		pdlim2	PDZ and LIM domain 2 (mystique)	936.706	472.842	1078	-0.459136	0.143256	-3.205	0.00135063	0.0617731	644	906	667	963	976	1055	1143	1138
xan	p<0.05		svilc	#N/A	181.835	274.632	220.75	-0.60582	0.189933	-3.18965	0.00142445	0.0646482	138	138	160	136	197	176	250	260
xan	p<0.05		FP325130	#N/A	192.584	262.447	233	-0.621416	0.194985	-3.18699	0.00143763	0.065052	175	152	122	159	204	227	249	252
xan	p<0.05		lmo7a	LIM domain 7a	3155.94	415.368	3574.5	-0.389734	0.122313	-3.18637	0.0014407	0.065052	2958	3126	2403	2463	3952	3440	3242	3664
xan	p<0.05		si:ch1073-340i21	#N/A	602.435	285.461	696.75	-0.446003	0.140114	-3.18315	0.00145684	0.0656133	438	445	394	757	505	673	557	1052
xan	p<0.05		ace	angiotensin I converting enzyme (peptidyl-dipeptidase A) 1	94.149	296.132	118	-0.760959	0.239369	-3.17902	0.00147773	0.0663853	94	57	62	67	157	122	106	87
xan	p<0.05		col2a1b	collagen, type II, alpha 1b	279.25	194.224	347	-0.588218	0.185596	-3.16935	0.0015278	0.068195	360	195	148	143	729	248	173	238
xan	p<0.05		aopep	#N/A	375.192	316.868	438.75	-0.478821	0.151095	-3.16901	0.00152957	0.068195	258	265	270	451	395	348	339	673
xan	p<0.05		dhrs13a.2	dehydrogenase/reductase (SDR family) member 13a, tandem duplicate 2	1054.19	1762.49	1200.75	-0.415747	0.131548	-3.16043	0.00157536	0.0695359	1167	772	609	1081	1336	1199	802	1466
xan	p<0.05		chmp2bb	charged multivesicular body protein 2Bb	812.459	681.658	930.75	-0.429864	0.136352	-3.1526	0.00161821	0.0712496	812	765	632	569	1044	895	867	917
xan	p<0.05		myo1ea	myosin IE, a	681.175	290.132	787.25	-0.43127	0.136927	-3.14963	0.0016348	0.0718013	412	662	566	660	508	830	769	1042
xan	p<0.05		dlx2b	distal-less homeobox 2b	89.6831	637.882	113	-0.78206	0.248607	-3.14577	0.0016565	0.0723954	60	92	63	51	125	125	92	110
xan	p<0.05		bambib	BMP and activin membrane-bound inhibitor homolog (Xenopus laevis) b	98.6878	642.303	123.75	-0.734277	0.234103	-3.13655	0.0017095	0.0743443	82	58	93	62	141	85	134	135
xan	p<0.05		tmem200b	#N/A	53.3071	770.632	70.5	-0.954673	0.304836	-3.13176	0.00173762	0.0748166	42	37	42	25	83	67	61	71
xan	p<0.05		ngfra	nerve growth factor receptor a (TNFR superfamily, member 16)	72.971	1191.88	93.25	-0.820309	0.261987	-3.13111	0.00174149	0.0748166	74	38	56	42	115	59	111	88
xan	p<0.05		add3b	adducin 3 (gamma) b	29.6448	911.671	41.75	-1.27268	0.407562	-3.12266	0.00179227	0.0764415	12	21	15	22	31	59	50	27
xan	p<0.05		lratd1	#N/A	91.3403	194	114.75	-0.737126	0.236677	-3.11448	0.00184272	0.0780293	35	78	67	92	55	121	114	169
xan	p<0.05		hsp70	#N/A	95.1542	327.329	144.75	-1.06623	0.343107	-3.10757	0.0018863	0.0793051	131	8	19	23	508	25	24	22
xan	p<0.05		description:si:dkeyp-67f1	#N/A	89.1548	387.053	115.75	-0.776436	0.250094	-3.10458	0.00190552	0.0797345	31	52	61	106	40	90	104	229
xan	p<0.05		npr1b	natriuretic peptide receptor 1b	63.2057	362.289	83.25	-0.938966	0.303956	-3.08916	0.00200726	0.0822627	58	48	52	15	134	55	97	47
xan	p<0.05		prkcea	protein kinase C, epsilon a	171.93	349.566	207.75	-0.590339	0.191105	-3.08908	0.00200777	0.0822627	136	131	138	141	170	187	233	241
xan	p<0.05		aplnra	apelin receptor a	12.6317	1123.2	20.25	-1.96238	0.638096	-3.07536	0.00210246	0.0855555	8	4	3	6	34	8	23	16
xan	p<0.05		ackr4b	atypical chemokine receptor 4b	184.582	355.158	219	-0.558022	0.18147	-3.07501	0.00210493	0.0855555	94	208	128	170	145	297	195	239
xan	p<0.05		bicdl2	#N/A	253.538	361.342	297.25	-0.514174	0.16723	-3.07465	0.00210747	0.0855555	317	168	176	178	417	262	235	275
xan	p<0.05		tmprss13b	transmembrane protease, serine 13b	473	1669.68	547	-0.485874	0.158261	-3.07009	0.00213993	0.0864766	559	395	338	303	583	601	534	470
xan	p<0.05		pim1	Pim-1 proto-oncogene, serine/threonine kinase	3236.7	1068.16	3695	-0.414995	0.135612	-3.06017	0.00221215	0.0887868	1606	2924	1990	4593	1936	3305	3536	6003
xan	p<0.05		jupa	junction plakoglobin a	13677.6	1510.63	15489	-0.367113	0.120296	-3.05175	0.00227508	0.0909004	10941	12203	11211	13111	13464	13611	14671	20210
xan	p<0.05		kcnj3b	potassium inwardly-rectifying channel, subfamily J, member 3b	29.981	545.526	41.5	-1.20071	0.394132	-3.04646	0.00231552	0.0919179	19	9	16	30	53	28	33	52
xan	p<0.05		mcm5	minichromosome maintenance complex component 5	73.503	447.75	93.75	-0.824466	0.271028	-3.04199	0.00235018	0.0928531	74	69	39	30	129	103	58	85
xan	p<0.05		thbs2b	thrombospondin 2b	1222.76	524.882	1415.25	-0.440766	0.145524	-3.02882	0.00245509	0.0959275	969	1580	1059	514	1664	1800	1625	572
xan	p<0.05		tdp2a	tyrosyl-DNA phosphodiesterase 2a	119.789	582.145	149	-0.689417	0.227815	-3.02621	0.00247638	0.0965459	77	114	79	92	111	138	138	209
xan	p<0.05		ndnf	neuron-derived neurotrophic factor	593.901	448.842	677	-0.403483	0.133502	-3.0223	0.00250859	0.09716	464	532	489	558	592	695	656	765
xan	p<0.05		tbx1	T-box 1	355.594	351.039	410.25	-0.462638	0.153359	-3.01669	0.0025555	0.0981178	135	327	387	354	205	403	535	498
xan	p<0.05		bhlhe41	basic helix-loop-helix family, member e41	1201	299.461	1353	-0.421871	0.139818	-3.01729	0.0025505	0.0981178	1779	1062	424	931	1830	1629	601	1352
xan	p<0.05		cyp26b1	cytochrome P450, family 26, subfamily b, polypeptide 1	2517.9	669.421	2874.25	-0.414772	0.137475	-3.01707	0.0025523	0.0981178	1634	2115	2244	2652	2654	3114	2272	3457
xan	p<0.05		si:ch1073-184j22	#N/A	99.4443	347.658	123	-0.690972	0.229181	-3.01496	0.00257015	0.0984019	84	81	63	76	134	109	115	134
xan	p<0.05		ier5	immediate early response 5	1184.32	368.171	1344.25	-0.3721	0.123722	-3.00755	0.00263362	0.100248	656	661	1130	1650	774	900	1434	2269
xan	p<0.05		map7d1a	MAP7 domain containing 1a	371.074	1229.07	431.75	-0.468725	0.156399	-2.99699	0.00272658	0.103342	402	322	233	284	527	401	309	490
xan	p<0.05		socs3a	suppressor of cytokine signaling 3a	387.263	1399.58	472.75	-0.574332	0.19199	-2.99147	0.00277634	0.104779	100	250	249	609	122	274	599	896
xan	p<0.05		myo10	myosin X	101.043	638.908	129	-0.737699	0.247027	-2.98631	0.00282368	0.105888	107	60	65	61	190	69	103	154
xan	p<0.05		pik3c3	phosphatidylinositol 3-kinase, catalytic subunit type 3	330.057	445.145	381.75	-0.468421	0.157003	-2.98352	0.00284955	0.106407	215	299	279	320	331	397	415	384
xan	p<0.05		pkp2	plakophilin 2	264.625	706.079	315.75	-0.623426	0.209274	-2.97899	0.002892	0.107765	328	114	258	154	372	209	291	391
xan	p<0.05		tcnbb	#N/A	379.731	329.105	435.75	-0.447304	0.150269	-2.97669	0.00291382	0.10835	335	232	282	445	440	362	379	562
xan	p<0.05		ngef	neuronal guanine nucleotide exchange factor	253.605	381.882	305.5	-0.573763	0.192865	-2.97494	0.00293046	0.10874	234	217	190	166	335	230	407	250
xan	p<0.05		ponzr5	plac8 onzin related protein 5	19.4051	740.487	29.75	-1.49652	0.503582	-2.97175	0.0029611	0.109412	12	7	10	10	37	19	14	49
xan	p<0.05		PSMD2	proteasome 26S subunit, non-ATPase 2	622.235	906.079	713	-0.430331	0.144838	-2.97112	0.00296711	0.109412	486	657	452	531	616	733	715	788
xan	p<0.05		ppm1ab	protein phosphatase, Mg2+/Mn2+ dependent, 1Ab	185.947	368.684	220.75	-0.552432	0.185978	-2.97042	0.00297397	0.109437	139	137	172	155	217	212	273	181
xan	p<0.05		si:dkey-91f15	#N/A	66.4206	383.171	84.75	-0.851401	0.28686	-2.968	0.00299742	0.109843	75	46	31	42	94	70	74	101
xan	p<0.05		anxa1d	#N/A	891.155	784.395	1038	-0.424122	0.14299	-2.9661	0.00301598	0.110295	579	639	680	1081	805	860	714	1773
xan	p<0.05		vsig8b	V-set and immunoglobulin domain containing 8b	452.643	1964.53	519.25	-0.435553	0.147733	-2.94825	0.00319576	0.1159	305	461	391	387	470	580	567	460
xan	p<0.05		apln	apelin	122.87	633.539	148.5	-0.61602	0.209197	-2.94469	0.00323281	0.116302	110	92	108	78	170	143	151	130
xan	p<0.05		si:dkey-259j3	#N/A	123.379	687.882	154.25	-0.69787	0.237399	-2.93965	0.00328587	0.116706	100	101	103	66	223	103	168	123
xan	p<0.05		si:ch211-11k18	#N/A	219.874	364.645	257	-0.505002	0.17185	-2.93862	0.00329678	0.116706	140	171	156	264	190	252	238	348
xan	p<0.05		lamb2l	laminin, beta 2-like	264.386	424.158	308.25	-0.544552	0.185245	-2.93964	0.00328598	0.116706	94	283	283	222	201	347	414	271
xan	p<0.05		tuba1c	tubulin, alpha 1c	288.966	880.039	339	-0.478652	0.162865	-2.93895	0.00329329	0.116706	321	227	202	206	503	318	242	293
xan	p<0.05		fam214a	family with sequence similarity 214, member A	331.924	304.842	384.75	-0.483848	0.16445	-2.94223	0.00325859	0.116706	397	347	233	140	573	384	360	222
xan	p<0.05		ppl	periplakin	12011.4	1635.22	13394.5	-0.342764	0.116538	-2.94123	0.00326916	0.116706	8573	12530	9845	11564	12233	13719	12305	15321
xan	p<0.05		clca5	#N/A	79.3235	946.421	100.75	-0.770564	0.262409	-2.9365	0.00331934	0.117077	77	42	74	38	126	50	139	88
xan	p<0.05		stard13b	StAR-related lipid transfer (START) domain containing 13b	251.924	660.132	296.25	-0.541154	0.18448	-2.9334	0.00335267	0.117743	308	236	155	131	405	275	311	194
xan	p<0.05		abca1b	ATP-binding cassette, sub-family A (ABC1), member 1B	400.264	468.118	466	-0.481629	0.164412	-2.92941	0.00339611	0.119032	238	446	310	346	323	486	562	493
xan	p<0.05		description:zgc:162193	#N/A	1482.73	1241.59	1664.25	-0.365557	0.124947	-2.92569	0.00343696	0.12	866	1291	1244	1803	1126	1568	1854	2109
xan	p<0.05		msx2b	muscle segment homeobox 2b	88.233	362.987	111.75	-0.748307	0.25604	-2.92262	0.00347101	0.120701	75	60	76	48	110	71	155	111
xan	p<0.05		rgs6	regulator of G-protein signaling 6	6.26117	1633.61	11.25	-3.20037	1.09947	-2.91082	0.0036048	0.125108	0	4	1	0	18	6	20	1
xan	p<0.05		zgc:158263	zgc:158263	346.001	648.776	400.25	-0.460228	0.158155	-2.90998	0.00361451	0.125199	313	298	233	323	379	382	387	453
xan	p<0.05		lamb1a	laminin, beta 1a	406.92	545.066	471.75	-0.457955	0.157569	-2.90638	0.00365634	0.126099	368	325	376	300	494	417	442	534
xan	p<0.05		cyp1c1	cytochrome P450, family 1, subfamily C, polypeptide 1	278.269	541.421	324	-0.481161	0.165822	-2.90168	0.00371169	0.127567	138	263	263	267	204	424	346	322
xan	p<0.05		irx1a	iroquois homeobox 1a	67.7998	586.263	85.75	-0.819706	0.282841	-2.89811	0.00375414	0.128527	79	41	32	48	101	64	82	96
xan	p<0.05		calm3a	calmodulin 3a (phosphorylase kinase, delta)	4497.02	744.934	5008.5	-0.324632	0.111999	-2.89852	0.00374934	0.128527	4147	3668	3350	4779	5046	4914	3936	6138
xan	p<0.05		fgf13b	fibroblast growth factor 13b	9.76089	568.711	16.75	-2.41837	0.83542	-2.8948	0.00379399	0.129602	4	2	4	0	22	21	3	21
xan	p<0.05		ttc3	tetratricopeptide repeat domain 3	727.294	681.75	833.75	-0.423067	0.146252	-2.89272	0.00381923	0.130001	642	697	547	598	777	760	852	946
xan	p<0.05		fosb	FBJ murine osteosarcoma viral oncogene homolog B	405.051	687.816	495.25	-0.598556	0.207134	-2.88971	0.003856	0.131	58	75	742	384	73	182	1367	359
xan	p<0.05		id1	inhibitor of DNA binding 1	2136.38	612.724	2387.5	-0.353454	0.12249	-2.88557	0.00390699	0.132479	1426	1105	2119	2890	1813	1598	2341	3798
xan	p<0.05		bzw2	basic leucine zipper and W2 domains 2	13.9205	560.013	20.75	-1.61512	0.560015	-2.88407	0.00392567	0.132857	11	7	5	6	25	15	22	21
xan	p<0.05		osbpl7	oxysterol binding protein-like 7	1288.34	452.526	1443	-0.349062	0.121272	-2.87833	0.00399788	0.134786	1301	1123	1041	1070	1559	1484	1280	1449
xan	p<0.05		col6a1	collagen, type VI, alpha 1	3519.68	434.75	3994	-0.362684	0.126055	-2.87719	0.00401233	0.135016	3450	3839	2516	2376	5550	4616	2950	2860
xan	p<0.05		wfikkn2b	WAP, follistatin/kazal, immunoglobulin, kunitz and netrin domain containing 2b	30.7872	882.487	42	-1.14619	0.39861	-2.87547	0.00403431	0.135498	11	20	34	14	41	44	60	23
xan	p<0.05		uraha	#N/A	7.99358	836.789	13.25	-2.36641	0.826052	-2.86472	0.00417383	0.13783	5	4	0	3	21	9	10	13
xan	p<0.05		atoh8	atonal bHLH transcription factor 8	83.7408	625.974	104	-0.712207	0.248431	-2.86682	0.00414624	0.13783	87	59	65	42	148	98	86	84
xan	p<0.05		gnpnat1	glucosamine-phosphate N-acetyltransferase 1	160.369	249.474	191.75	-0.565722	0.197343	-2.86669	0.0041479	0.13783	202	77	116	122	284	117	145	221
xan	p<0.05		mxi1	max interactor 1, dimerization protein	357.712	332.079	413.5	-0.440819	0.153816	-2.86589	0.00415839	0.13783	215	346	304	342	291	503	355	505
xan	p<0.05		myo5b	myosin VB	883.218	1909.26	1002.25	-0.396819	0.138606	-2.86294	0.00419735	0.138061	690	892	775	700	1040	943	1025	1001
xan	p<0.05		cbsb	cystathionine-beta-synthase b	1231.06	1242.8	1390.5	-0.379154	0.132459	-2.86242	0.00420422	0.138061	1821	767	995	703	2339	878	1217	1128
xan	p<0.05		nipal3	NIPA-like domain containing 3	383.685	1872.26	439.5	-0.429541	0.150158	-2.86059	0.00422849	0.138089	289	319	307	396	370	451	459	478
xan	p<0.05		FLNB	filamin B, beta (actin binding protein 278)	768.673	1877.83	893.25	-0.439555	0.153601	-2.86167	0.00421416	0.138089	628	853	650	445	825	1022	1223	503
xan	p<0.05		mboat1	membrane bound O-acyltransferase domain containing 1	268.578	1158.01	314.25	-0.5142	0.179858	-2.85892	0.0042508	0.138562	189	299	197	206	279	314	352	312
xan	p<0.05		rcan3	regulator of calcineurin 3	180.181	1161.5	213.25	-0.526142	0.184073	-2.85833	0.00425873	0.138565	100	158	147	184	133	237	234	249
xan	p<0.05		dnajb9b	DnaJ (Hsp40) homolog, subfamily B, member 9b	26.0774	1160.53	37.75	-1.27677	0.447039	-2.85606	0.00428933	0.13905	12	14	16	15	62	19	35	35
xan	p<0.05		tmem132e	transmembrane protein 132E	89.1146	744.395	110	-0.679575	0.238056	-2.85469	0.0043079	0.139396	68	66	84	55	114	91	139	96
xan	p<0.05		rtca	RNA 3'-terminal phosphate cyclase	272.639	794.816	315	-0.465322	0.163066	-2.85358	0.00432295	0.139628	339	168	209	205	446	263	283	268
xan	p<0.05		eps8l1b	#N/A	260.953	2492.3	303.75	-0.469478	0.164834	-2.84819	0.00439684	0.141497	371	137	181	184	530	201	232	252
xan	p<0.05		reep3b	receptor accessory protein 3b	971.604	2520.37	1097.75	-0.360617	0.12706	-2.83816	0.00453744	0.144969	706	771	716	1190	863	1072	843	1613
xan	p<0.05		crestin	crestin	97.8174	1852.12	120.25	-0.66484	0.234329	-2.83721	0.00455094	0.145081	87	72	88	54	162	119	113	87
xan	p<0.05		cast	calpastatin	7643.04	2843.72	8576.75	-0.364794	0.128873	-2.83065	0.00464533	0.147352	4841	8505	6768	6724	6612	8526	10297	8872
xan	p<0.05		si:dkey-248g15	#N/A	4480.98	346.368	5201.25	-0.421442	0.149463	-2.81972	0.00480661	0.151382	2073	2408	3180	7383	2454	4547	3182	10622
xan	p<0.05		inhbaa	inhibin, beta Aa	129.04	578.961	158.75	-0.678227	0.240978	-2.81447	0.0048857	0.152522	121	110	106	59	202	139	123	171
xan	p<0.05		pde4ba	phosphodiesterase 4B, cAMP-specific a	1456.92	1196.55	1657.25	-0.362509	0.12877	-2.81517	0.00487508	0.152522	1344	869	1083	1731	1540	1007	1480	2602
xan	p<0.05		ccn1	#N/A	583.874	729.868	728.75	-0.522615	0.185914	-2.81106	0.00493788	0.15353	704	310	499	243	1523	280	789	323
xan	p<0.05		si:dkey-11o15	#N/A	486.146	612.697	569.5	-0.487209	0.173382	-2.81004	0.00495357	0.153552	280	526	499	306	474	505	895	404
xan	p<0.05		uggt2	UDP-glucose glycoprotein glucosyltransferase 2	116.97	618.171	142.25	-0.635269	0.226142	-2.80916	0.00496714	0.153704	106	110	78	74	138	139	157	135
xan	p<0.05		calm3b	calmodulin 3b (phosphorylase kinase, delta)	4095.65	1258.82	4549.5	-0.318092	0.113529	-2.80185	0.00508102	0.156073	3192	3923	3770	3683	3917	4809	4401	5071
xan	p<0.05		tgm8	transglutaminase 8	16.8326	723.908	25.5	-1.58007	0.565098	-2.7961	0.00517232	0.157011	11	14	7	1	50	22	16	14
xan	p<0.05		cspg5a	chondroitin sulfate proteoglycan 5a	239.098	362.526	279	-0.552872	0.197766	-2.79559	0.00518048	0.157011	267	153	128	248	303	313	226	274
xan	p<0.05		zbtb7b	#N/A	719.68	351.658	821.5	-0.383089	0.136989	-2.7965	0.00516601	0.157011	516	646	567	744	645	812	669	1160
xan	p<0.05		glulb	glutamate-ammonia ligase (glutamine synthase) b	6237.89	743.526	6902.75	-0.339922	0.12154	-2.7968	0.00516121	0.157011	8724	4954	3667	4946	9389	7353	4823	6046
xan	p<0.05		lipeb	lipase, hormone-sensitive b	83.8182	1174.2	105.5	-0.721692	0.258394	-2.79299	0.0052223	0.158008	54	77	70	47	84	113	165	60
xan	p<0.05		rrbp1a	ribosome binding protein 1a	835.224	469.921	983.25	-0.448673	0.160887	-2.78874	0.00529132	0.159551	683	704	616	746	903	807	695	1528
xan	p<0.05		fabp2	fatty acid binding protein 2, intestinal	153.55	1287.58	202.5	-0.703818	0.252478	-2.78764	0.0053094	0.159824	119	59	99	143	132	94	121	463
xan	p<0.05		dsc2l	desmocollin 2 like	4748.09	892.118	5314	-0.321117	0.115243	-2.78645	0.00532896	0.159869	6702	3988	3541	2499	8960	4573	4796	2927
xan	p<0.05		ctps1b	CTP synthase 1b	544.354	891.566	622.25	-0.388216	0.139961	-2.77375	0.00554148	0.164295	354	416	428	668	456	546	503	984
xan	p<0.05		serinc5	serine incorporator 5	188.73	635.132	222	-0.548701	0.197999	-2.77123	0.00558449	0.165157	106	238	158	120	190	265	277	156
xan	p<0.05		b4galnt3a	beta-1,4-N-acetyl-galactosaminyl transferase 3a	444.161	311.553	507.25	-0.421347	0.152336	-2.76591	0.00567651	0.166868	220	435	419	449	324	471	631	603
xan	p<0.05		snap25b	synaptosomal-associated protein, 25b	5.59092	296.145	9.75	-2.8076	1.01572	-2.76415	0.00570706	0.166967	1	2	1	3	8	3	14	14
xan	p<0.05		lbx2	ladybird homeobox 2	46.7068	264.013	62.25	-0.935182	0.338454	-2.7631	0.00572552	0.16723	32	31	27	35	76	30	70	73
xan	p<0.05		id4	inhibitor of DNA binding 4	51.2397	489.961	66.75	-0.850091	0.308175	-2.75847	0.00580725	0.169338	16	30	41	55	30	54	60	123
xan	p<0.05		epha7	eph receptor A7	230.409	307.737	270.25	-0.490589	0.177916	-2.75741	0.00582604	0.169607	190	184	218	170	227	238	310	306
xan	p<0.05		macc1	metastasis associated in colon cancer 1	295.529	352.882	341	-0.442793	0.160701	-2.75538	0.00586236	0.170384	290	229	250	230	371	280	355	358
xan	p<0.05		ankha	ANKH inorganic pyrophosphate transport regulator a	602.53	363.632	689.5	-0.393822	0.143174	-2.75066	0.00594756	0.172577	357	495	659	551	396	758	919	685
xan	p<0.05		fgf24	fibroblast growth factor 24	78.2191	377.737	97.25	-0.704507	0.256614	-2.74539	0.00604385	0.174513	55	76	56	49	74	114	118	83
xan	p<0.05		galnt6	UDP-N-acetyl-alpha-D-galactosamine:polypeptide N-acetylgalactosaminyltransferase 6 (GalNAc-T6)	607.34	372.697	689.25	-0.391878	0.142708	-2.74601	0.00603248	0.174513	507	564	489	541	690	663	769	635
xan	p<0.05		dlx5a	distal-less homeobox 5a	255.021	371.776	297.75	-0.477314	0.173973	-2.74361	0.0060768	0.174643	174	177	200	298	227	308	231	425
xan	p<0.05		capn2b	calpain 2, (m/II) large subunit b	5006.27	1288.74	5578	-0.308282	0.112357	-2.74377	0.00607373	0.174643	3088	4217	4041	6393	3723	5160	4732	8697
xan	p<0.05		hoxa13b	homeobox A13b	775.029	738.553	866.25	-0.380254	0.138785	-2.73987	0.00614632	0.175621	906	395	505	929	985	570	735	1175
xan	p<0.05		fuca2	fucosidase, alpha-L- 2, plasma	952.096	347.289	1069.25	-0.355383	0.129729	-2.73943	0.00615464	0.175621	972	772	861	733	1261	964	981	1071
xan	p<0.05		sall3b	spalt-like transcription factor 3b	54.2186	713.776	69.5	-0.837211	0.305885	-2.73702	0.00619993	0.176146	31	42	47	35	81	56	73	68
xan	p<0.05		nup153	nucleoporin 153	377.878	662.592	441.25	-0.470331	0.17183	-2.73719	0.00619662	0.176146	394	286	297	282	450	408	346	561
xan	p<0.05		lfng	LFNG O-fucosylpeptide 3-beta-N-acetylglucosaminyltransferase	146.094	211.737	174	-0.543902	0.198983	-2.73341	0.00626814	0.177419	104	102	122	146	153	165	150	228
xan	p<0.05		col12a1b	collagen, type XII, alpha 1b	1349.4	734.618	1547.25	-0.43092	0.157666	-2.73312	0.00627376	0.177419	890	1770	1235	711	1728	1881	1804	776
xan	p<0.05		sh3tc2	SH3 domain and tetratricopeptide repeats 2	278.284	96.5263	326.75	-0.5121	0.187445	-2.732	0.0062951	0.177709	250	291	177	202	397	326	356	228
xan	p<0.05		f5	coagulation factor V	9.89077	818.158	15.5	-2.19838	0.805195	-2.73025	0.00632862	0.17837	1	9	6	0	22	13	11	16
xan	p<0.05		cfap43	cilia and flagella associated protein 43	35.8962	973.632	48.25	-1.01805	0.374126	-2.72113	0.00650593	0.181834	17	22	30	25	63	29	57	44
xan	p<0.05		bmp5	bone morphogenetic protein 5	44.3655	833.079	58.25	-0.919334	0.337794	-2.72158	0.00649701	0.181834	33	37	33	19	84	56	43	50
xan	p<0.05		dennd2c	DENN/MADD domain containing 2C	457.183	410.211	520.25	-0.396125	0.145627	-2.72014	0.00652543	0.18189	289	463	375	449	407	566	447	661
xan	p<0.05		limk2	LIM domain kinase 2	3009.55	545.145	3359.75	-0.333451	0.12284	-2.71451	0.00663731	0.184718	2015	3363	2641	2620	2586	4084	3914	2855
xan	p<0.05		mcm3	minichromosome maintenance complex component 3	81.6863	521.158	101.5	-0.706984	0.260583	-2.71309	0.00666599	0.184934	95	70	45	38	157	92	63	94
xan	p<0.05		pald1a	phosphatase domain containing, paladin 1a	152.527	395.276	181.5	-0.567755	0.209229	-2.71356	0.00665649	0.184934	193	86	116	99	251	141	135	199
xan	p<0.05		pam	peptidylglycine alpha-amidating monooxygenase	797.56	398.592	901.5	-0.380149	0.140496	-2.70577	0.00681466	0.188468	797	631	664	682	822	862	976	946
xan	p<0.05		mlpha	melanophilin a	204.472	422.776	237.75	-0.532194	0.197187	-2.69893	0.00695638	0.191192	281	184	116	104	284	307	200	160
xan	p<0.05		hnrnph1l	heterogeneous nuclear ribonucleoprotein H1, like	501.708	570.421	571.5	-0.398391	0.14759	-2.69931	0.00694827	0.191192	566	416	379	367	717	550	430	589
xan	p<0.05		ca6	carbonic anhydrase VI	1054.88	555.013	1177.75	-0.336338	0.124605	-2.69923	0.00694993	0.191192	1057	777	953	941	1240	959	1308	1204
xan	p<0.05		atl3	atlastin 3	1254.5	400.474	1399	-0.33968	0.126015	-2.69555	0.00702715	0.19204	1185	1349	1032	874	1639	1488	1295	1174
xan	p<0.05		ilf3b	interleukin enhancer binding factor 3b	728.568	374.276	820.5	-0.386908	0.143711	-2.69226	0.00709688	0.192391	815	692	511	529	892	833	824	733
xan	p<0.05		galnt7	UDP-N-acetyl-alpha-D-galactosamine: polypeptide N-acetylgalactosaminyltransferase 7	1856.72	434.224	2052	-0.316288	0.117478	-2.69232	0.00709572	0.192391	1229	1744	1553	2119	1609	2126	2024	2449
xan	p<0.05		TCIM	#N/A	124.35	244.882	158.25	-0.668363	0.24844	-2.69024	0.00714003	0.192944	97	41	24	201	95	67	46	425
xan	p<0.05		ca2	carbonic anhydrase II	99.4729	400.974	128.5	-0.826152	0.308351	-2.67926	0.00737859	0.198848	50	92	59	82	173	130	151	60
xan	p<0.05		gcshb	glycine cleavage system protein H (aminomethyl carrier), b	372.572	398.395	425.75	-0.419067	0.156543	-2.67701	0.00742833	0.199214	371	197	247	464	405	295	341	662
xan	p<0.05		tuba1a	tubulin, alpha 1a	132.885	402.368	159.25	-0.576693	0.215489	-2.67621	0.00744608	0.199388	125	136	84	82	221	151	142	123
xan	p<0.05		casp6b.2	#N/A	20.4971	427.632	28.25	-1.29124	0.483597	-2.67009	0.00758319	0.201927	5	6	16	25	16	21	26	50
xan	p<0.05		zgc:92107	zgc:92107	441.385	364.276	496.5	-0.401367	0.150328	-2.66994	0.00758651	0.201927	332	388	270	554	463	527	399	597
xan	p<0.05		mcm6	minichromosome maintenance complex component 6	120.273	166.895	143.5	-0.575552	0.21575	-2.66768	0.00763765	0.202405	135	110	66	79	182	146	101	145
xan	p<0.05		sgk1	serum/glucocorticoid regulated kinase 1	478.546	365.934	548.75	-0.478794	0.179562	-2.66646	0.00766553	0.20281	579	511	296	247	602	648	390	555
xan	p<0.05		etv5a	ets variant 5a	249.113	323.145	296.75	-0.537882	0.201996	-2.66283	0.0077486	0.204397	169	298	184	152	190	385	235	377
xan	p<0.05		ap1s3b	adaptor-related protein complex 1, sigma 3 subunit, b	137.174	276.803	162.25	-0.532566	0.20007	-2.6619	0.00777016	0.204661	123	80	104	143	183	122	140	204
xan	p<0.05		mycn	v-myc avian myelocytomatosis viral oncogene neuroblastoma derived homolog	226.135	336.895	268.5	-0.53387	0.200649	-2.66071	0.00779754	0.204822	188	116	213	218	397	181	276	220
xan	p<0.05		evplb	envoplakin b	1938.8	367.539	2146.25	-0.308946	0.116118	-2.66063	0.00779944	0.204822	1756	1886	1608	1676	2272	2235	1923	2155
xan	p<0.05		zgc:153031	zgc:153031	13.4737	222.947	19.75	-1.57373	0.591951	-2.65855	0.00784777	0.205786	3	7	14	4	10	18	29	22
xan	p<0.05		myb	v-myb avian myeloblastosis viral oncogene homolog	746.232	223.553	840.25	-0.353549	0.133017	-2.65793	0.00786226	0.205861	542	614	753	700	649	795	1089	828
xan	p<0.05		nrp2b	neuropilin 2b	148.052	359.579	176	-0.552992	0.208105	-2.65728	0.00787738	0.205952	137	141	115	88	195	161	171	177
xan	p<0.05		rac1a	ras-related C3 botulinum toxin substrate 1a (rho family, small GTP binding protein Rac1)	1342.64	428	1491.25	-0.317864	0.120105	-2.64656	0.00813163	0.211351	1200	1246	1001	1329	1534	1448	1248	1735
xan	p<0.05		pcolce2b	procollagen C-endopeptidase enhancer 2b	47.7678	395.276	63.25	-0.884855	0.334719	-2.64357	0.00820357	0.212285	56	36	25	12	138	49	38	28
xan	p<0.05		phactr3b	phosphatase and actin regulator 3b	5.61953	420.987	9.75	-2.66291	1.00918	-2.6387	0.00832255	0.214736	3	0	1	2	14	3	6	16
xan	p<0.05		mfsd2ab	major facilitator superfamily domain containing 2ab	300.429	421	346.25	-0.443126	0.167989	-2.63783	0.00834379	0.214971	290	248	289	192	423	285	349	328
xan	p<0.05		si:ch1073-190k2	#N/A	108.526	382.711	131	-0.604245	0.229193	-2.6364	0.00837902	0.215121	119	83	77	66	159	117	105	143
xan	p<0.05		actn4	actinin, alpha 4	3856	707.684	4249.25	-0.311735	0.118219	-2.63693	0.00836594	0.215121	2462	4555	3733	3100	3203	4839	4858	4097
xan	p<0.05		zic3	zic family member 3 heterotaxy 1 (odd-paired homolog, Drosophila)	54.0803	462.842	68.75	-0.887629	0.33686	-2.63501	0.00841344	0.215289	36	37	66	17	69	55	74	77
xan	p<0.05		pgm3	phosphoglucomutase 3	59.11	406.053	73.25	-0.788086	0.299098	-2.63487	0.00841693	0.215289	17	61	59	42	51	86	86	70
xan	p<0.05		inhbb	inhibin, beta B	535.096	508.053	597.5	-0.417687	0.158582	-2.63389	0.00844119	0.215597	184	655	439	613	331	718	612	729
xan	p<0.05		ptp4a1	protein tyrosine phosphatase type IVA, member 1	735.228	449.684	836	-0.393197	0.149446	-2.63102	0.00851287	0.217115	678	611	680	569	695	908	819	922
xan	p<0.05		smarca5	SWI/SNF related, matrix associated, actin dependent regulator of chromatin, subfamily a, member 5	409.303	338.829	462	-0.415817	0.158191	-2.62858	0.00857434	0.217914	589	318	291	229	661	431	367	389
xan	p<0.05		cx44	#N/A	75.9528	417.566	94	-0.688042	0.261878	-2.62734	0.00860553	0.218221	76	37	58	60	146	72	84	74
xan	p<0.05		dusp6	dual specificity phosphatase 6	1772.59	550.632	2010.75	-0.351344	0.133912	-2.6237	0.00869809	0.220252	1245	1520	1381	1992	1229	2007	1958	2849
xan	p<0.05		mindy3	#N/A	134.493	439.5	158.25	-0.538476	0.205759	-2.61702	0.00887008	0.223329	96	96	98	154	157	138	153	185
xan	p<0.05		KIF1C	kinesin family member 1C	324.627	415.368	373.75	-0.416025	0.159056	-2.61558	0.00890755	0.223636	224	264	283	330	274	367	336	518
xan	p<0.05		tnfaip6	tumor necrosis factor, alpha-induced protein 6	105.409	238.671	131.5	-0.653064	0.250573	-2.60629	0.00915298	0.227539	80	102	62	73	163	158	57	148
xan	p<0.05		trpm1b	transient receptor potential cation channel, subfamily M, member 1b	134.197	276.382	168	-0.668324	0.256387	-2.6067	0.00914195	0.227539	122	74	104	101	200	142	254	76
xan	p<0.05		sp6	#N/A	44.5153	212.342	58.75	-0.896772	0.344179	-2.60554	0.009173	0.227717	35	31	21	34	46	39	60	90
xan	p<0.05		pax7b	paired box 7b	57.6913	397.513	73.75	-0.913557	0.350987	-2.60282	0.00924597	0.229207	10	61	48	46	44	91	123	37
xan	p<0.05		ociad2	OCIA domain containing 2	5.03784	450.079	8.5	-2.86275	1.10585	-2.58873	0.00963298	0.237697	0	4	0	3	8	8	7	11
xan	p<0.05		slc16a12b	solute carrier family 16, member 12b	966.731	403.842	1085	-0.398957	0.154167	-2.58782	0.00965851	0.237697	1300	684	659	750	1274	906	1184	976
xan	p<0.05		scinla	scinderin like a	1969.44	427.882	2175.5	-0.302216	0.116815	-2.58713	0.00967801	0.237697	1272	2081	1881	1819	1606	2676	2361	2059
xan	p<0.05		psmd1	proteasome 26S subunit, non-ATPase 1	1116.23	1384.93	1270.75	-0.35543	0.13746	-2.58569	0.0097183	0.238246	742	962	949	1195	800	1355	1084	1844
xan	p<0.05		hoxa13a	homeobox A13a	198.949	867.592	229.75	-0.457993	0.177344	-2.58252	0.00980829	0.239788	167	140	151	215	251	197	202	269
xan	p<0.05		samd11	sterile alpha motif domain containing 11	134.549	414.118	161.5	-0.586937	0.227857	-2.5759	0.00999791	0.243476	117	124	89	100	138	141	199	168
xan	p<0.05		fstl1a	follistatin-like 1a	32.1574	373.882	42.5	-0.947174	0.368489	-2.57043	0.0101573	0.244604	26	21	22	19	48	37	40	45
xan	p<0.05		acap3b	ArfGAP with coiled-coil, ankyrin repeat and PH domains 3b	246.13	737.868	283	-0.433191	0.168457	-2.57152	0.0101253	0.244604	145	192	225	275	188	250	351	343
xan	p<0.05		ccdc80	coiled-coil domain containing 80	288.287	1105.78	337.75	-0.473614	0.184291	-2.56993	0.010172	0.244624	270	298	210	178	394	409	204	344
xan	p<0.05		jun	jun proto-oncogene	3143.03	1138.45	3561.5	-0.397555	0.155318	-2.55961	0.0104788	0.250643	3416	2648	2047	2788	3672	3788	3955	2831
xan	p<0.05		si:ch211-159i8	#N/A	62.7091	213.224	78.75	-0.742606	0.290788	-2.55377	0.0106563	0.253231	40	49	55	43	100	62	73	80
xan	p<0.05		dhrsx	dehydrogenase/reductase (SDR family) X-linked	68.4086	228.658	84.75	-0.705445	0.276166	-2.55442	0.0106364	0.253231	51	44	53	59	63	101	90	85
xan	p<0.05		casp3b	caspase 3, apoptosis-related cysteine peptidase b	276.558	840.592	322	-0.429784	0.168405	-2.55208	0.0107081	0.253727	199	219	198	309	256	256	258	518
xan	p<0.05		vwa5a	#N/A	1615.46	167.868	1796	-0.30753	0.120631	-2.54935	0.0107923	0.255379	1436	1324	1228	1751	1694	1595	1455	2440
xan	p<0.05		pcdh7a	protocadherin 7a	17.5723	403.684	25.25	-1.4202	0.560866	-2.53215	0.0113366	0.265528	11	10	17	1	24	23	23	31
xan	p<0.05		tp53inp1	tumor protein p53 inducible nuclear protein 1	265.226	495.289	300.25	-0.42674	0.168569	-2.53154	0.0113562	0.265528	104	404	208	205	164	486	267	284
xan	p<0.05		wu:fj29h11	wu:fj29h11	740.249	505.447	837.75	-0.398355	0.157272	-2.53291	0.011312	0.265528	459	871	622	618	636	812	1030	873
xan	p<0.05		si:ch211-57n23	#N/A	143.356	219.039	167.75	-0.503288	0.199133	-2.5274	0.0114912	0.268027	143	129	108	94	180	195	149	147
xan	p<0.05		vcp	valosin containing protein	3272.04	565.763	3772.25	-0.377479	0.149359	-2.52733	0.0114934	0.268027	2929	2643	2465	3050	3367	3221	2613	5888
xan	p<0.05		sox14	SRY (sex determining region Y)-box 14	156.379	209.013	186.25	-0.52363	0.207424	-2.52444	0.0115883	0.269737	104	115	153	133	146	146	180	273
xan	p<0.05		fam83e	family with sequence similarity 83, member E	340.801	224.395	386.75	-0.391485	0.155161	-2.52309	0.0116329	0.270214	276	313	294	296	379	363	433	372
xan	p<0.05		pmm2	phosphomannomutase 2	48.4395	336.368	60.5	-0.789985	0.313275	-2.52169	0.0116791	0.270223	20	45	29	51	45	66	59	72
xan	p<0.05		upk1a	uroplakin 1a	1134.72	257.579	1303	-0.418232	0.165846	-2.52181	0.0116754	0.270223	770	1150	920	1026	1280	1423	1612	897
xan	p<0.05		slc5a3b	solute carrier family 5 (sodium/myo-inositol cotransporter), member 3b	112.86	332.355	135.5	-0.570562	0.226799	-2.51571	0.0118792	0.274136	115	68	89	88	172	94	174	102
xan	p<0.05		vegfaa	vascular endothelial growth factor Aa	38.8892	155.355	49.75	-0.895903	0.356371	-2.51396	0.0119384	0.274889	19	21	43	28	52	42	51	54
xan	p<0.05		maff	v-maf avian musculoaponeurotic fibrosarcoma oncogene homolog F	301.049	402.5	345.5	-0.41531	0.16521	-2.51383	0.0119429	0.274889	297	239	263	227	421	282	308	371
xan	p<0.05		ampd3b	adenosine monophosphate deaminase 3b	1317.34	217.921	1458.75	-0.310309	0.123522	-2.51217	0.0119991	0.275465	750	1155	1400	1400	991	1286	1690	1868
xan	p<0.05		zgc:100829	zgc:100829	207.23	333.526	237.75	-0.440294	0.175329	-2.51124	0.0120307	0.275834	105	201	182	218	157	270	227	297
xan	p<0.05		ezrb	ezrin b	1270.77	308.303	1411.5	-0.36945	0.147574	-2.50349	0.0122974	0.281584	580	1530	1226	1185	1032	1811	1590	1213
xan	p<0.05		matn4	matrilin 4	65.9326	309.237	102.75	-2.00342	0.800738	-2.50197	0.0123505	0.281899	23	28	60	6	152	54	72	133
xan	p<0.05		yars1	#N/A	196.144	263.803	229.5	-0.481056	0.192566	-2.49814	0.0124846	0.284054	185	186	97	182	275	322	135	186
xan	p<0.05		thbs3b	thrombospondin 3b	15.6732	306.803	21.5	-1.74237	0.697902	-2.49658	0.0125399	0.284559	1	17	21	0	25	15	33	13
xan	p<0.05		si:ch211-252f13	#N/A	89.0053	242.013	108.25	-0.613428	0.245697	-2.49668	0.0125362	0.284559	113	62	47	57	194	82	86	71
xan	p<0.05		lsp1a	#N/A	389.812	289.276	444	-0.41067	0.165525	-2.48102	0.0131008	0.294644	322	267	332	421	421	485	363	507
xan	p<0.05		tars1	#N/A	589.686	267.855	662.75	-0.352108	0.141915	-2.48111	0.0130972	0.294644	555	522	444	544	603	654	585	809
xan	p<0.05		omd	osteomodulin	6.31788	288.645	10.25	-2.2846	0.921236	-2.47993	0.0131407	0.295166	0	5	4	1	6	10	17	8
xan	p<0.05		slc31a2	solute carrier family 31 (copper transporter), member 2	15.1373	276.961	21.5	-1.341	0.541446	-2.4767	0.0132604	0.297476	8	10	6	11	14	21	21	30
xan	p<0.05		si:dkey-3h3	#N/A	41.1249	271.711	52.25	-0.859512	0.347421	-2.47398	0.0133618	0.298312	16	24	38	43	48	47	47	67
xan	p<0.05		si:ch73-204p21	#N/A	173.523	333.066	204.25	-0.486615	0.196798	-2.47266	0.0134111	0.298673	138	143	134	154	164	234	154	265
xan	p<0.05		si:dkey-223p19	#N/A	233.465	334.987	272	-0.45606	0.184448	-2.47256	0.013415	0.298673	106	245	194	234	145	253	287	403
xan	p<0.05		zgc:64189	zgc:64189	86.467	188.934	104.25	-0.604964	0.244771	-2.47155	0.0134528	0.299139	61	91	64	59	103	117	117	80
xan	p<0.05		cebpb	CCAAT/enhancer binding protein (C/EBP), beta	1521.43	377.513	1708.5	-0.316124	0.128101	-2.46777	0.0135958	0.301561	1566	691	1099	1980	1796	874	1227	2937
xan	p<0.05		si:ch211-108d22	#N/A	69.2006	375.763	81.5	-0.890479	0.361066	-2.46625	0.0136537	0.302088	12	37	66	113	55	111	72	88
xan	p<0.05		basp1	brain abundant, membrane attached signal protein 1	14.2478	466.105	21.5	-1.63123	0.661666	-2.46533	0.0136886	0.302106	14	2	7	4	10	13	21	42
xan	p<0.05		zgc:153311	zgc:153311	19.0701	466.355	26	-1.25065	0.507237	-2.46561	0.0136782	0.302106	3	15	11	19	19	21	25	39
xan	p<0.05		hmgcs1	3-hydroxy-3-methylglutaryl-CoA synthase 1 (soluble)	1680.17	372.763	1963	-0.415657	0.168824	-2.46207	0.0138139	0.30449	2343	1536	1179	531	4159	1271	1554	868
xan	p<0.05		kifc3	kinesin family member C3	305.007	515.118	345	-0.388149	0.157718	-2.46103	0.0138539	0.304544	246	326	239	249	326	387	347	320
xan	p<0.05		ildr1a	immunoglobulin-like domain containing receptor 1a	739.825	449.184	826.5	-0.341547	0.138978	-2.45757	0.0139881	0.305665	518	843	650	601	655	932	995	724
xan	p<0.05		mthfd2	methylenetetrahydrofolate dehydrogenase (NADP+ dependent) 2, methenyltetrahydrofolate cyclohydrolase	356.944	520.105	403.5	-0.428138	0.174402	-2.45489	0.0140926	0.307337	764	184	182	112	959	234	199	222
xan	p<0.05		plekhn1	pleckstrin homology domain containing, family N member 1	438.156	409.618	495.25	-0.374457	0.152598	-2.45388	0.0141323	0.307677	539	290	366	328	634	323	559	465
xan	p<0.05		gas2b	growth arrest-specific 2b	62.2185	270.395	78.75	-0.75897	0.309379	-2.4532	0.0141591	0.307882	38	59	57	29	51	75	83	106
xan	p<0.05		wee1	WEE1 G2 checkpoint kinase	123.156	631.526	148	-0.564669	0.230469	-2.45009	0.0142821	0.309796	113	114	95	71	116	213	127	136
xan	p<0.05		pawr	PRKC, apoptosis, WT1, regulator	289.648	277.842	332	-0.405866	0.165636	-2.45035	0.0142717	0.309796	221	247	262	258	263	286	411	368
xan	p<0.05		calhm2	calcium homeostasis modulator 2	107.838	452.632	130.75	-0.59711	0.244	-2.44718	0.014398	0.311545	86	81	100	72	100	137	115	171
xan	p<0.05		tnfrsf21	tumor necrosis factor receptor superfamily, member 21	316.299	463.763	370.25	-0.457412	0.187097	-2.44479	0.0144936	0.312468	292	350	254	153	424	379	513	165
xan	p<0.05		cln8	ceroid-lipofuscinosis, neuronal 8	29.5003	183.118	38.75	-1.01084	0.413735	-2.4432	0.0145576	0.313468	14	31	28	7	27	40	53	35
xan	p<0.05		dgat2	diacylglycerol O-acyltransferase 2	306.774	827.882	442.5	-1.08459	0.444013	-2.44269	0.0145783	0.313531	168	217	200	99	508	390	784	88
xan	p<0.05		kpna2	karyopherin alpha 2 (RAG cohort 1, importin alpha 1)	139.31	242.158	162.75	-0.495854	0.203202	-2.4402	0.0146791	0.314934	209	79	78	98	283	100	121	147
xan	p<0.05		sik1	salt-inducible kinase 1	1505.69	445.408	1997.25	-0.860619	0.35303	-2.4378	0.0147767	0.316645	699	845	891	1623	1375	788	2844	2982
xan	p<0.05		plpp1a	phospholipid phosphatase 1a	1092	393.987	1221	-0.325125	0.133418	-2.43689	0.014814	0.316676	1050	1017	806	979	1323	1139	919	1503
xan	p<0.05		her9	hairy-related 9	742.026	411.632	832.5	-0.338503	0.139208	-2.43164	0.0150305	0.319759	838	398	829	543	980	436	1090	824
xan	p<0.05		bcl2l16	BCL2-like 16	209.465	559.105	241	-0.42481	0.174744	-2.43105	0.0150553	0.319902	206	180	153	175	308	232	195	229
xan	p<0.05		plppr3b	phospholipid phosphatase related 3b	17.5302	535.934	24.5	-1.22781	0.505437	-2.4292	0.0151322	0.320766	12	13	6	12	23	23	25	27
xan	p<0.05		arhgef16	Rho guanine nucleotide exchange factor (GEF) 16	880.29	481.408	974.5	-0.309215	0.127345	-2.42817	0.0151752	0.32109	473	784	713	1174	569	922	967	1440
xan	p<0.05		reep5	receptor accessory protein 5	2176.59	667.895	2407.75	-0.296463	0.122103	-2.42797	0.0151837	0.32109	1781	1663	1728	2610	2032	2334	1907	3358
xan	p<0.05		efemp2b	EGF containing fibulin-like extracellular matrix protein 2b	105.361	333.711	125.25	-0.543866	0.224161	-2.42624	0.0152563	0.321856	99	79	86	79	127	124	115	135
xan	p<0.05		cyp3a65	cytochrome P450, family 3, subfamily A, polypeptide 65	40.1319	197.197	51.25	-0.805291	0.332537	-2.42166	0.0154499	0.323813	22	23	33	38	42	36	57	70
xan	p<0.05		TMEM19	transmembrane protein 19	51.2435	203.868	63.25	-0.74855	0.309133	-2.42145	0.0154588	0.323813	22	26	34	74	32	60	61	100
xan	p<0.05		mfsd6a	major facilitator superfamily domain containing 6a	208.975	209.105	240.25	-0.432478	0.178468	-2.42328	0.015381	0.323813	201	180	159	170	265	204	238	254
xan	p<0.05		thbs2a	thrombospondin 2a	453.565	302.816	509	-0.412471	0.170243	-2.42283	0.0154002	0.323813	237	576	461	320	465	622	537	412
xan	p<0.05		cthrc1b	collagen triple helix repeat containing 1b	36.7499	399.474	47.25	-0.861562	0.356125	-2.41927	0.0155517	0.325373	45	25	12	25	83	39	28	39
xan	p<0.05		ino80e	INO80 complex subunit E	653.844	765.592	728.75	-0.320879	0.13271	-2.4179	0.0156106	0.32545	454	589	589	683	531	740	723	921
xan	p<0.05		atf3	activating transcription factor 3	83.0883	651.132	104.75	-0.695866	0.287922	-2.41685	0.0156554	0.326002	97	28	94	28	198	29	112	80
xan	p<0.05		lgals3b	lectin, galactoside binding soluble 3b	2788.18	686.408	3070.75	-0.281184	0.116405	-2.41557	0.0157107	0.326767	1833	2289	2395	3505	2109	3047	2700	4427
xan	p<0.05		picalmb	phosphatidylinositol binding clathrin assembly protein b	238.568	356.592	273.75	-0.453584	0.188132	-2.41099	0.0159094	0.330513	210	165	158	281	243	230	309	313
xan	p<0.05		btbd6a	BTB (POZ) domain containing 6a	75.7837	349.75	92.5	-0.725772	0.301226	-2.4094	0.015979	0.331568	109	45	39	43	95	67	91	117
xan	p<0.05		psmb3	proteasome subunit beta 3	416.701	323.737	470.25	-0.353412	0.146982	-2.40446	0.0161965	0.334123	282	328	303	539	320	451	379	731
xan	p<0.05		pitx2	paired-like homeodomain 2	9.57698	360.118	15.5	-1.72071	0.716138	-2.40277	0.0162715	0.334501	6	3	3	3	23	5	9	25
xan	p<0.05		nr5a2	nuclear receptor subfamily 5, group A, member 2	23.5386	343.25	31.75	-1.03366	0.430827	-2.39925	0.0164287	0.335141	9	21	16	16	20	48	29	30
xan	p<0.05		siae	sialic acid acetylesterase	86.196	346.632	104.25	-0.591806	0.246678	-2.39911	0.0164351	0.335141	60	77	82	53	77	146	110	84
xan	p<0.05		aldh3b1	aldehyde dehydrogenase 3 family, member B1	279.103	358.921	315.75	-0.424127	0.17671	-2.40012	0.0163895	0.335141	167	209	236	358	251	350	304	358
xan	p<0.05		cd44a	CD44 molecule (Indian blood group) a	734.453	608.039	818.75	-0.320667	0.133619	-2.39987	0.016401	0.335141	700	565	628	708	849	697	713	1016
xan	p<0.05		pax9	paired box 9	15.9924	246.053	22.75	-1.54078	0.643381	-2.39482	0.0166285	0.338304	3	15	15	2	34	16	15	26
xan	p<0.05		pcxa	pyruvate carboxylase a	1467.56	683.092	1634.5	-0.305441	0.127635	-2.39309	0.0167072	0.339514	1472	1362	1471	897	1963	1485	2074	1016
xan	p<0.05		wu:fj05g07	wu:fj05g07	53.144	1011.79	65.75	-0.718947	0.300647	-2.39133	0.0167873	0.340628	39	37	32	55	58	76	61	68
xan	p<0.05		cux1a	cut-like homeobox 1a	256.887	845.118	296.25	-0.444306	0.185961	-2.38925	0.0168829	0.341517	259	246	208	156	370	232	317	266
xan	p<0.05		f3b	coagulation factor IIIb	151.68	1066.96	189.25	-0.581738	0.243741	-2.3867	0.0170002	0.343496	143	54	130	130	384	73	175	125
xan	p<0.05		kirrel3l	kin of IRRE like 3 like	77.8184	1011.59	94.5	-0.637571	0.267307	-2.38517	0.0170714	0.344149	67	57	47	74	72	109	97	100
xan	p<0.05		nubp2	nucleotide binding protein 2 (MinD homolog, E. coli)	165.585	1714.74	193.5	-0.475059	0.199447	-2.38188	0.0172244	0.34684	145	121	119	167	160	218	156	240
xan	p<0.05		znf1039	zinc finger protein 1039	12.4818	420.053	18.75	-1.75488	0.739298	-2.37371	0.0176102	0.351014	0	7	13	6	28	24	11	12
xan	p<0.05		ddx5	DEAD (Asp-Glu-Ala-Asp) box helicase 5	9660.44	1124.21	10563.5	-0.276506	0.116465	-2.37415	0.0175896	0.351014	10672	8821	8643	6892	11641	9918	11922	8773
xan	p<0.05		uacaa	uveal autoantigen with coiled-coil domains and ankyrin repeats a	126.131	591.118	147.75	-0.491091	0.207113	-2.37112	0.0177341	0.351905	95	89	127	108	126	126	167	172
xan	p<0.05		jtb	jumping translocation breakpoint	161.626	780.684	187	-0.46511	0.196287	-2.36954	0.0178102	0.352619	161	111	153	121	209	172	171	196
xan	p<0.05		usp54a	ubiquitin specific peptidase 54a	151.213	1109.96	176	-0.519961	0.220002	-2.36344	0.0181063	0.357282	84	172	111	139	177	181	184	162
xan	p<0.05		igfbp3	insulin-like growth factor binding protein 3	325.863	666.408	367.75	-0.398278	0.168961	-2.35722	0.0184121	0.361302	399	283	214	239	398	436	316	321
xan	p<0.05		aox6	aldehyde oxidase 6	72.7506	364.684	86.75	-0.675451	0.28678	-2.3553	0.0185079	0.361671	110	46	51	27	112	90	78	67
xan	p<0.05		slc38a3b	solute carrier family 38, member 3b	317.036	329.118	355.75	-0.367749	0.156112	-2.35568	0.0184889	0.361671	255	249	240	370	320	341	335	427
xan	p<0.05		psmd7	proteasome 26S subunit, non-ATPase 7	535.835	679.5	598	-0.327353	0.138951	-2.35589	0.0184783	0.361671	461	446	431	556	518	583	538	753
xan	p<0.05		ppp1r14bb	protein phosphatase 1, regulatory (inhibitor) subunit 14Bb	329.921	607.671	371.5	-0.378554	0.160982	-2.35152	0.0186967	0.364463	217	356	301	278	325	392	365	404
xan	p<0.05		si:ch211-226o13	#N/A	91.9609	318.316	107.5	-0.68341	0.29091	-2.34921	0.0188131	0.365926	58	18	108	122	67	69	130	164
xan	p<0.05		tyrp1b	tyrosinase-related protein 1b	15.7938	512.474	23	-1.32701	0.565336	-2.3473	0.0189102	0.366204	5	11	6	13	31	28	6	27
xan	p<0.05		gba2	glucosidase, beta (bile acid) 2	153.902	570.789	181.5	-0.469483	0.199978	-2.34768	0.0188909	0.366204	78	136	132	159	88	178	195	265
xan	p<0.05		anxa11a	annexin A11a	2103.3	523.908	2309.25	-0.274425	0.116875	-2.34801	0.0188738	0.366204	1456	1896	1786	2451	1677	2492	2045	3023
xan	p<0.05		atf4a	activating transcription factor 4a	4688.25	1186.29	5198	-0.285726	0.121711	-2.34758	0.018896	0.366204	3821	4128	3764	5001	4185	5184	4164	7259
xan	p<0.05		relt	RELT tumor necrosis factor receptor	289.625	505.461	313.25	-0.531054	0.226323	-2.34644	0.0189537	0.366645	734	93	121	116	629	111	306	207
xan	p<0.05		MYO1D	#N/A	126.738	421.474	146.75	-0.489847	0.208983	-2.34396	0.0190803	0.367087	63	160	113	90	97	199	156	135
xan	p<0.05		ppp2r1bb	#N/A	1043.99	486.934	1160.75	-0.325236	0.138827	-2.34274	0.0191425	0.367885	831	1011	833	1035	1071	1342	1221	1009
xan	p<0.05		rer1	retention in endoplasmic reticulum sorting receptor 1	399.605	633.829	447.25	-0.343456	0.147072	-2.3353	0.0195277	0.373261	336	339	307	427	427	478	367	517
xan	p<0.05		zdhhc6	zinc finger, DHHC-type containing 6	586.327	300.5	665	-0.342698	0.146905	-2.33278	0.0196595	0.374567	303	578	533	617	335	666	677	982
xan	p<0.05		nipa2	non imprinted in Prader-Willi/Angelman syndrome 2 (human)	632.817	617.605	697.25	-0.316921	0.135935	-2.33142	0.0197314	0.375291	1031	460	426	357	1211	539	551	488
xan	p<0.05		zdhhc16a	zinc finger, DHHC-type containing 16a	619.679	407.461	689	-0.315436	0.135627	-2.32576	0.0200313	0.379608	739	490	469	503	939	575	546	696
xan	p<0.05		trib1	tribbles pseudokinase 1	386.911	374.118	430.75	-0.341471	0.14687	-2.325	0.0200722	0.379977	220	252	345	556	284	332	432	675
xan	p<0.05		git1	G protein-coupled receptor kinase interacting ArfGAP 1	449.758	310.105	503.75	-0.346265	0.148997	-2.32397	0.020127	0.380607	361	437	409	376	485	461	530	539
xan	p<0.05		klf3	Kruppel-like factor 3 (basic)	710.549	250.066	787.5	-0.318492	0.137135	-2.32248	0.0202072	0.381716	568	815	579	572	690	904	707	849
xan	p<0.05		irf2bp2a	interferon regulatory factor 2 binding protein 2a	937.822	345.368	1045	-0.324186	0.139798	-2.31896	0.020397	0.384226	1253	657	689	724	1490	662	959	1069
xan	p<0.05		ccnd1	cyclin D1	864.255	290.961	965.25	-0.32576	0.140623	-2.31655	0.0205284	0.385724	830	568	790	867	904	782	860	1315
xan	p<0.05		si:dkey-31f5	#N/A	287.062	158.447	322.5	-0.371711	0.160839	-2.31107	0.0208292	0.390944	262	193	232	319	340	286	287	377
xan	p<0.05		gadd45bb	growth arrest and DNA-damage-inducible, beta b	183.98	234.684	217	-0.451639	0.195749	-2.30724	0.0210417	0.393282	91	70	156	287	92	107	223	446
xan	p<0.05		cyp51	cytochrome P450, family 51	1087.79	353.342	1214	-0.322934	0.140423	-2.29972	0.0214639	0.39823	1170	1172	821	684	1778	1151	1048	879
xan	p<0.05		col4a6	collagen, type IV, alpha 6	238.507	167.395	277.75	-0.420768	0.183266	-2.29594	0.0216794	0.399415	289	190	187	129	468	207	291	145
xan	p<0.05		angpt2b	angiopoietin 2b	28.4169	273.066	36.75	-0.916404	0.400128	-2.29028	0.0220052	0.404038	29	18	16	17	37	42	37	31
xan	p<0.05		jund	jun D proto-oncogene	430.381	275.566	484.75	-0.351755	0.153642	-2.28944	0.0220535	0.404505	450	246	439	369	523	293	525	598
xan	p<0.05		BX914205	#N/A	13.9807	765.158	20.25	-1.29735	0.567415	-2.28642	0.0222297	0.407314	7	9	10	6	25	13	23	20
xan	p<0.05		chac2	ChaC, cation transport regulator homolog 2 (E. coli)	121.863	430.908	155.75	-0.605813	0.265121	-2.28505	0.0223101	0.407665	94	121	60	77	104	350	92	77
xan	p<0.05		pttg1ipb	pituitary tumor-transforming 1 interacting protein b	68.0066	431.974	82	-0.614283	0.26924	-2.28154	0.0225163	0.410442	78	38	48	52	105	70	62	91
xan	p<0.05		ncs1b	neuronal calcium sensor 1b	11.9388	438.855	17	-1.41082	0.619674	-2.27672	0.0228029	0.413537	11	5	3	9	31	14	11	12
xan	p<0.05		smad6a	SMAD family member 6a	170.978	286.579	199.5	-0.484339	0.213292	-2.27078	0.0231603	0.418304	182	129	148	112	189	187	177	245
xan	p<0.05		dbnla	drebrin-like a	818.676	317.224	915.75	-0.314558	0.138778	-2.26663	0.0234131	0.421578	681	663	699	842	795	828	750	1290
xan	p<0.05		sh3rf1	SH3 domain containing ring finger 1	167.382	674.382	192	-0.435666	0.192434	-2.26398	0.0235754	0.42321	133	174	128	135	182	219	210	157
xan	p<0.05		znf976	zinc finger protein 976	4.29718	883.237	7.5	-2.63568	1.1681	-2.25638	0.0240466	0.426243	0	3	2	0	5	6	5	14
xan	p<0.05		elovl7b	ELOVL fatty acid elongase 7b	121.622	1248.41	141.75	-0.542571	0.240469	-2.2563	0.0240519	0.426243	163	37	151	55	255	63	141	108
xan	p<0.05		svopl	SVOP-like	176.078	285.289	201.75	-0.419952	0.18597	-2.25817	0.0239349	0.426243	94	132	159	216	115	201	208	283
xan	p<0.05		cxcr4a	chemokine (C-X-C motif) receptor 4a	267.882	279.395	304.25	-0.428894	0.189847	-2.25916	0.0238735	0.426243	225	132	254	315	229	264	362	362
xan	p<0.05		s1pr3a	sphingosine-1-phosphate receptor 3a	14.372	1066.24	20.25	-1.29446	0.574755	-2.2522	0.0243096	0.429851	4	14	11	6	23	21	19	18
xan	p<0.05		col6a2	collagen, type VI, alpha 2	2498.2	1001.5	2763.5	-0.285053	0.126654	-2.25064	0.0244083	0.430735	2503	2749	1891	1789	3724	3102	2312	1916
xan	p<0.05		psmd11b	proteasome 26S subunit, non-ATPase 11b	280.373	372.342	316	-0.362721	0.161227	-2.24975	0.0244649	0.431105	237	247	242	254	292	288	344	340
xan	p<0.05		cpne2	copine II	95.3115	1286.75	112.75	-0.535401	0.238238	-2.24733	0.0246189	0.432725	53	84	83	92	80	146	126	99
xan	p<0.05		stam2	signal transducing adaptor molecule (SH3 domain and ITAM motif) 2	767.792	1258.78	845.5	-0.295202	0.131435	-2.24599	0.0247048	0.433374	778	638	663	681	844	816	846	876
xan	p<0.05		pdxdc1	pyridoxal-dependent decarboxylase domain containing 1	368.876	302.329	415.25	-0.346609	0.154491	-2.24356	0.0248606	0.434886	264	350	339	338	312	407	423	519
xan	p<0.05		myzap	#N/A	476.787	352.105	527.5	-0.3162	0.140979	-2.24288	0.0249043	0.435149	417	533	422	332	527	609	545	429
xan	p<0.05		cldnb	claudin b	4653.98	549.421	5090.75	-0.277878	0.123942	-2.24199	0.0249617	0.435722	4755	3242	4064	4808	4786	4574	4779	6224
xan	p<0.05		plk2a	polo-like kinase 2a (Drosophila)	433.636	467.526	491.25	-0.348835	0.155796	-2.23905	0.0251524	0.437756	421	327	442	315	594	328	649	394
xan	p<0.05		ifi45	#N/A	20.0683	542.974	27.5	-1.05141	0.470047	-2.23682	0.025298	0.438949	8	14	10	19	19	27	15	49
xan	p<0.05		nog3	noggin 3	173.041	337.25	197	-0.429769	0.192561	-2.23186	0.025624	0.442483	161	97	153	184	196	157	228	207
xan	p<0.05		susd6	sushi domain containing 6	862.195	539.197	954.75	-0.335655	0.150512	-2.23008	0.0257419	0.443222	995	879	692	513	1035	925	1111	748
xan	p<0.05		rab11fip1b	RAB11 family interacting protein 1 (class I) b	63.9088	507.211	80	-0.665072	0.298881	-2.22521	0.0260671	0.446647	51	58	40	43	60	74	61	125
xan	p<0.05		skib	v-ski avian sarcoma viral oncogene homolog b	220.077	538.053	248.25	-0.383281	0.172227	-2.22544	0.0260515	0.446647	151	241	203	172	215	290	272	216
xan	p<0.05		chd4a	chromodomain helicase DNA binding protein 4a	910.266	759.539	1007.25	-0.299909	0.13486	-2.22386	0.0261577	0.447766	920	804	746	783	1074	868	918	1169
xan	p<0.05		rell1	#N/A	255.555	180.092	287.75	-0.368206	0.165779	-2.22106	0.0263466	0.450131	201	198	221	273	247	295	271	338
xan	p<0.05		rabggta	Rab geranylgeranyltransferase, alpha subunit	94.9971	552.776	112.25	-0.521009	0.234871	-2.21828	0.0265358	0.452298	73	78	69	92	113	88	112	136
xan	p<0.05		sp100	#N/A	526.906	313.868	584.25	-0.308895	0.139287	-2.21769	0.0265757	0.452298	432	452	466	528	497	533	638	669
xan	p<0.05		epb41l4b	erythrocyte membrane protein band 4.1 like 4B	267.418	499.053	302.75	-0.370699	0.167556	-2.21239	0.0269399	0.457617	293	223	205	208	403	263	309	236
xan	p<0.05		b3galt2	UDP-Gal:betaGlcNAc beta 1,3-galactosyltransferase, polypeptide 2	292.008	861.368	326.75	-0.394754	0.178714	-2.20886	0.0271842	0.46044	138	281	204	406	202	302	360	443
xan	p<0.05		slc17a9a	solute carrier family 17 (vesicular nucleotide transporter), member 9a	82.206	584.592	98	-0.568435	0.257969	-2.2035	0.0275592	0.464155	98	64	50	52	138	67	95	92
xan	p<0.05		BX640522	#N/A	178.657	393.053	205	-0.439548	0.199368	-2.2047	0.0274749	0.464155	137	201	147	123	221	200	237	162
xan	p<0.05		ist1	increased sodium tolerance 1 homolog (yeast)	1129.84	492.184	1248.25	-0.288865	0.131095	-2.20348	0.0275608	0.464155	910	1036	1047	1052	1044	1277	1132	1540
xan	p<0.05		arpc1a	actin related protein 2/3 complex, subunit 1A	3198.68	889.513	3499.25	-0.266176	0.120765	-2.20408	0.0275188	0.464155	2795	2412	2656	3731	3196	3355	2812	4634
xan	p<0.05		quo	quattro	61.3421	460.618	74.5	-0.624084	0.28341	-2.20205	0.0276614	0.464608	41	30	66	57	83	40	87	88
xan	p<0.05		qars1	#N/A	387.968	689.539	433.75	-0.338275	0.153623	-2.20198	0.0276665	0.464608	397	302	355	316	485	389	385	476
xan	p<0.05		bnipl	BCL2/adenovirus E1B 19kD interacting protein, like	648.304	717.526	748.25	-0.384262	0.174574	-2.20114	0.0277263	0.46512	731	633	409	421	1258	613	703	419
xan	p<0.05		tgm5l	transglutaminase 5, like	48.5971	707.5	64	-0.741622	0.337188	-2.19943	0.0278474	0.465879	59	22	27	25	152	39	38	27
xan	p<0.05		vangl2	VANGL planar cell polarity protein 2	576.462	712.434	634.75	-0.305059	0.138731	-2.19892	0.0278837	0.466045	402	566	493	612	529	687	661	662
xan	p<0.05		hpse2	heparanase 2	6.62297	1239.39	10.75	-1.93872	0.88247	-2.19693	0.0280258	0.467368	2	3	3	1	8	17	17	1
xan	p<0.05		admb	adrenomedullin b	86.5939	374.763	101.75	-0.558525	0.254257	-2.1967	0.0280421	0.467368	63	40	98	85	120	70	107	110
xan	p<0.05		si:ch73-329n5	#N/A	564.819	463.316	623	-0.298176	0.135721	-2.19698	0.0280218	0.467368	609	430	638	348	742	555	786	409
xan	p<0.05		f13a1b	coagulation factor XIII, A1 polypeptide b	2467.11	1249.59	2700	-0.269888	0.123018	-2.19389	0.0282436	0.46896	2829	1859	1869	2380	3429	2642	1989	2740
xan	p<0.05		evx1	even-skipped homeobox 1	74.4807	479.342	89.5	-0.583213	0.266002	-2.19251	0.0283426	0.470163	81	62	54	41	121	66	94	77
xan	p<0.05		psat1	phosphoserine aminotransferase 1	139.238	828.053	160	-0.451283	0.206027	-2.19041	0.0284948	0.470973	74	154	107	138	127	211	125	177
xan	p<0.05		gpr160	G protein-coupled receptor 160	13.0955	760.145	18.75	-1.28214	0.585957	-2.18812	0.0286608	0.472359	7	5	12	7	27	14	23	11
xan	p<0.05		prss35	protease, serine, 35	155.814	1089.84	187.75	-0.482717	0.220683	-2.18738	0.0287152	0.472359	186	124	72	114	380	163	99	109
xan	p<0.05		abcb7	ATP-binding cassette, sub-family B (MDR/TAP), member 7	211.796	645.855	239.75	-0.385027	0.176308	-2.18384	0.0289741	0.475164	201	191	162	180	228	242	235	254
xan	p<0.05		mfap5	microfibrillar associated protein 5	329.144	624.789	367	-0.338751	0.155143	-2.18348	0.0290004	0.475164	329	251	235	349	375	356	292	445
xan	p<0.05		krt18a.1	#N/A	1622.24	2056.07	1781.5	-0.289829	0.132753	-2.18322	0.0290199	0.475164	883	2150	1296	1523	1323	2785	1423	1595
xan	p<0.05		gpc4	glypican 4	464.431	309.25	516	-0.317232	0.1456	-2.1788	0.0293468	0.479131	463	428	343	417	553	474	437	600
xan	p<0.05		chmp4bb	charged multivesicular body protein 4Bb	993.653	653.987	1085.5	-0.268738	0.123361	-2.17848	0.0293705	0.479131	958	825	860	964	1118	1046	1029	1149
xan	p<0.05		itga6l	integrin, alpha 6, like	32.8782	1224.61	41.25	-0.814397	0.374072	-2.17712	0.0294719	0.47946	27	28	31	12	44	48	41	32
xan	p<0.05		ddx3xb	#N/A	2986.37	462.303	3257.75	-0.2546	0.116932	-2.17733	0.0294557	0.47946	2378	3083	2596	2803	2718	3619	2897	3797
xan	p<0.05		crabp2a	cellular retinoic acid binding protein 2, a	695.378	977.579	764.75	-0.294247	0.135533	-2.17104	0.0299284	0.483987	721	655	507	621	902	723	713	721
xan	p<0.05		mpp2b	membrane protein, palmitoylated 2b (MAGUK p55 subfamily member 2)	29.7876	1307	37.75	-0.84306	0.388904	-2.16778	0.0301751	0.487015	17	26	32	12	30	48	44	29
xan	p<0.05		pld7	#N/A	336.495	1177.8	376.25	-0.33941	0.156578	-2.16767	0.0301839	0.487015	277	272	312	327	340	392	341	432
xan	p<0.05		ddx39aa	DEAD (Asp-Glu-Ala-Asp) box polypeptide 39Aa	697.679	724.75	776.5	-0.313374	0.144639	-2.16659	0.0302662	0.487898	743	540	556	638	795	704	614	993
xan	p<0.05		scamp2l	secretory carrier membrane protein 2, like	201.848	343.763	228.25	-0.379824	0.175423	-2.16519	0.0303734	0.48918	166	170	173	193	230	230	218	235
xan	p<0.05		smap1	small ArfGAP 1	1214.16	1348.59	1332	-0.270078	0.125081	-2.15922	0.030833	0.493439	943	1282	981	1180	994	1604	1270	1460
xan	p<0.05		nme2a	NME/NM23 nucleoside diphosphate kinase 2a	48.4729	1336.32	60.25	-0.713092	0.330501	-2.15761	0.030958	0.494993	28	17	28	73	37	48	33	123
xan	p<0.05		col18a1a	#N/A	1631.56	9630.97	1794.5	-0.272907	0.126641	-2.15496	0.0311651	0.497854	1598	1510	1403	1363	2319	1734	1630	1495
xan	p<0.05		cd9b	CD9 molecule b	1425.72	9815.46	1555.25	-0.264757	0.122977	-2.1529	0.0313268	0.499535	987	1305	1130	1762	1166	1781	1303	1971
xan	p<0.05		and2	actinodin2	29.3276	1528.68	47.75	-2.74906	1.27753	-2.15185	0.0314089	0.499943	1	23	18	1	85	19	24	63
xan	p<0.05		tbx2a	T-box 2a	23.3413	3468.04	30.75	-0.964684	0.449798	-2.1447	0.0319765	0.5048	14	17	24	9	43	21	39	20
xan	p<0.05		c1qtnf9	C1q and tumor necrosis factor related protein 9	44.0389	3454.79	54.75	-0.704865	0.328896	-2.14312	0.0321033	0.5048	37	21	27	47	43	46	40	90
xan	p<0.05		cdh2	cadherin 2, type 1, N-cadherin (neuronal)	252.008	3464.8	283.5	-0.382379	0.178367	-2.14377	0.032051	0.5048	272	263	203	143	349	275	260	250
xan	p<0.05		sqlea	squalene epoxidase a	448.67	3454.93	502.25	-0.335654	0.15641	-2.14599	0.031874	0.5048	716	348	344	173	972	365	399	273
xan	p<0.05		fdps	farnesyl diphosphate synthase (farnesyl pyrophosphate synthetase, dimethylallyltranstransferase, geranyltranstransferase)	510.972	3493.03	586	-0.407267	0.189984	-2.14369	0.032058	0.5048	403	557	446	337	833	458	596	457
xan	p<0.05		atp1a1a.1	ATPase, Na+/K+ transporting, alpha 1a polypeptide, tandem duplicate 1	2929	3286.67	3201	-0.272183	0.126934	-2.1443	0.0320091	0.5048	3393	2496	2343	2396	3578	2982	2650	3594
xan	p<0.05		zgc:111983	zgc:111983	4086.31	1531.99	4440.5	-0.243061	0.113233	-2.14656	0.0318285	0.5048	3382	3812	4586	3148	4220	4609	5557	3376
xan	p<0.05		kirrel3a	kin of IRRE like 3 a	7.9283	3553.47	11.75	-1.59608	0.745465	-2.14105	0.0322699	0.505739	4	4	3	4	12	20	8	7
xan	p<0.05		slc41a2a	solute carrier family 41 (magnesium transporter), member 2a	24.0137	3546.37	31.25	-0.915276	0.427603	-2.14048	0.0323158	0.505739	14	24	15	13	35	38	33	19
xan	p<0.05		lyve1a	lymphatic vessel endothelial hyaluronic receptor 1a	243.924	3475.16	278.75	-0.371992	0.173704	-2.14153	0.0322311	0.505739	212	196	163	267	272	215	203	425
xan	p<0.05		edem1	ER degradation enhancer, mannosidase alpha-like 1	265.894	3461.66	298	-0.345796	0.161531	-2.14074	0.0322946	0.505739	195	251	266	223	247	318	358	269
xan	p<0.05		sh3d21	SH3 domain containing 21	576.77	3482.46	638	-0.305352	0.142581	-2.14159	0.0322261	0.505739	513	475	506	569	596	713	583	660
xan	p<0.05		psd2	pleckstrin and Sec7 domain containing 2	92.8184	3273.76	110	-0.600595	0.280792	-2.13893	0.032441	0.507249	42	110	98	52	87	148	78	127
xan	p<0.05		actb1	actin, beta 1	42579	3151.88	46357	-0.245601	0.114908	-2.13738	0.0325671	0.507875	42737	34605	36273	41588	52097	42773	36757	53801
xan	p<0.05		psmc1a	proteasome 26S subunit, ATPase 1a	680.812	520.684	754.5	-0.288393	0.13504	-2.13562	0.0327106	0.509664	530	572	503	823	583	733	583	1119
xan	p<0.05		chmp5b	charged multivesicular body protein 5b	1324.28	557.895	1443.75	-0.260457	0.12204	-2.13419	0.0328269	0.511026	960	1046	1172	1642	1099	1391	1334	1951
xan	p<0.05		macf1a	microtubule-actin crosslinking factor 1a	1067.4	221.408	1185.75	-0.324356	0.152227	-2.13074	0.0331108	0.513638	1110	1047	1017	621	1523	929	1307	984
xan	p<0.05		coq2	coenzyme Q2 4-hydroxybenzoate polyprenyltransferase	136.389	261.513	162.25	-0.466875	0.219293	-2.129	0.0332542	0.51496	120	99	93	131	158	117	106	268
xan	p<0.05		cntnap3	contactin associated protein-like 3	20.3217	266.776	26.75	-0.987729	0.464247	-2.12759	0.0333708	0.516313	14	12	6	25	28	27	14	38
xan	p<0.05		mmp30	matrix metallopeptidase 30	45.4522	309.447	56	-0.734988	0.345642	-2.12644	0.0334665	0.516891	28	43	51	17	64	61	50	49
xan	p<0.05		gsk3bb	#N/A	48.7003	188.171	60.5	-0.736965	0.346776	-2.12519	0.0335708	0.517599	39	61	29	19	94	51	51	46
xan	p<0.05		mc1r	melanocortin 1 receptor	29.6743	560.855	37.5	-0.831362	0.391494	-2.12356	0.0337067	0.518733	38	19	14	17	49	41	30	30
xan	p<0.05		cdipt	CDP-diacylglycerol--inositol 3-phosphatidyltransferase (phosphatidylinositol synthase)	128.609	461	148.5	-0.44242	0.208442	-2.12251	0.0337948	0.519243	132	80	96	128	190	126	111	167
xan	p<0.05		FQ311879	#N/A	88.928	270.184	104.25	-0.513746	0.242468	-2.11882	0.0341058	0.522447	69	64	88	73	122	96	103	96
xan	p<0.05		xiap	X-linked inhibitor of apoptosis	389.623	461.987	430	-0.314654	0.148518	-2.11863	0.0341214	0.522447	568	307	270	253	660	400	324	336
xan	p<0.05		acta1a	actin, alpha 1a, skeletal muscle	459.306	556.974	512.25	-0.31342	0.147901	-2.11912	0.0340805	0.522447	401	379	396	451	491	470	425	663
xan	p<0.05		plekhg4	pleckstrin homology domain containing, family G (with RhoGef domain) member 4	616.477	208.895	679	-0.300272	0.14182	-2.11728	0.034236	0.523555	510	647	511	549	678	680	723	635
xan	p<0.05		oxct1a	3-oxoacid CoA transferase 1a	78.051	374.053	92.25	-0.526035	0.248882	-2.11359	0.0345501	0.525375	78	62	57	57	122	90	74	83
xan	p<0.05		fli1a	Fli-1 proto-oncogene, ETS transcription factor a	169.903	173.934	195	-0.43028	0.203479	-2.11462	0.0344625	0.525375	122	187	148	122	164	188	200	228
xan	p<0.05		psmc6	proteasome 26S subunit, ATPase 6	491.273	300.395	545	-0.305957	0.144734	-2.11394	0.0345208	0.525375	362	463	421	504	472	528	465	715
xan	p<0.05		pnpla6	patatin-like phospholipase domain containing 6	652.747	285.105	725	-0.296541	0.140279	-2.11393	0.0345209	0.525375	308	673	668	673	351	729	968	852
xan	p<0.05		slc45a4b	#N/A	253.341	266.605	284	-0.362314	0.17154	-2.11213	0.0346756	0.526008	140	282	228	241	198	336	341	261
xan	p<0.05		tuba8l2	tubulin, alpha 8 like 2	2704.49	307.342	3001.75	-0.269693	0.127687	-2.11214	0.0346741	0.526008	1625	2528	2129	3346	1559	3344	2650	4454
xan	p<0.05		znf385c	zinc finger protein 385C	8.56478	242.592	12.5	-1.48498	0.703269	-2.11154	0.0347257	0.526237	5	4	4	4	14	16	14	6
xan	p<0.05		znf1078	zinc finger protein 1078	12.1308	280.776	15.75	-1.59331	0.754854	-2.11076	0.0347933	0.526811	0	0	17	17	12	3	21	27
xan	p<0.05		niban2a	#N/A	478.705	379.645	525	-0.323885	0.153582	-2.10888	0.0349552	0.52881	818	403	257	251	929	461	412	298
xan	p<0.05		mcm4	minichromosome maintenance complex component 4	122.891	305.816	142.75	-0.448137	0.212576	-2.10812	0.0350206	0.529346	127	107	93	85	207	133	115	116
xan	p<0.05		ankrd22	ankyrin repeat domain 22	129.56	269.316	146.25	-0.502916	0.23874	-2.10654	0.0351574	0.530961	241	26	74	110	279	64	80	162
xan	p<0.05		tmco3	transmembrane and coiled-coil domains 3	474.398	470.316	523.25	-0.299903	0.142585	-2.10333	0.035437	0.533817	279	497	410	516	330	611	563	589
xan	p<0.05		phf21aa	PHD finger protein 21Aa	68.9594	263.711	82	-0.568494	0.27069	-2.10017	0.0357142	0.536168	69	87	37	31	116	104	64	44
xan	p<0.05		ifrd1	interferon-related developmental regulator 1	742.03	406.408	819.75	-0.285763	0.136057	-2.10032	0.035701	0.536168	552	730	681	694	612	982	743	942
xan	p<0.05		lratb.1	#N/A	48.9721	165.355	59.5	-0.640434	0.305133	-2.09887	0.0358287	0.536975	19	50	32	52	30	78	51	79
xan	p<0.05		nav2a	neuron navigator 2a	63.0307	145.711	74	-0.657135	0.313226	-2.09796	0.0359087	0.537719	35	51	98	23	82	73	85	56
xan	p<0.05		igf2bp2b	insulin-like growth factor 2 mRNA binding protein 2b	280.404	280.711	311.75	-0.334198	0.159508	-2.09518	0.0361551	0.540038	137	267	234	358	174	346	299	428
xan	p<0.05		dusp23a	dual specificity phosphatase 23a	29.1402	197.487	36.75	-0.854254	0.407814	-2.09472	0.0361962	0.540197	7	16	24	38	18	37	27	65
xan	p<0.05		ptpmt1	protein tyrosine phosphatase, mitochondrial 1	40.7702	507.132	50.5	-0.722401	0.345052	-2.0936	0.0362958	0.540771	26	30	16	53	34	42	43	83
xan	p<0.05		mid1ip1b	MID1 interacting protein 1b	763.148	407.329	856.25	-0.323596	0.154754	-2.09103	0.036525	0.543049	676	432	721	851	702	636	726	1361
xan	p<0.05		kif13bb	kinesin family member 13Bb	226.049	553.632	255	-0.366892	0.175551	-2.08994	0.0366233	0.543819	215	214	203	156	277	232	302	209
xan	p<0.05		atp6v1aa	ATPase, H+ transporting, lysosomal, V1 subunit Aa	667.534	551.184	736.25	-0.292174	0.139999	-2.08698	0.0368901	0.546376	640	603	564	589	645	807	707	786
xan	p<0.05		csrp2	cysteine and glycine-rich protein 2	193.362	371.829	217.5	-0.402107	0.192893	-2.08461	0.0371043	0.548202	277	129	156	115	283	166	250	171
xan	p<0.05		slc6a9	solute carrier family 6 (neurotransmitter transporter, glycine), member 9	217.347	207.618	244.5	-0.363226	0.174534	-2.08112	0.0374232	0.550615	226	214	148	173	317	251	206	204
xan	p<0.05		smad7	SMAD family member 7	218.082	174.224	249.75	-0.414094	0.198972	-2.08116	0.037419	0.550615	224	140	197	185	232	245	203	319
xan	p<0.05		si:ch211-229n2	#N/A	132.028	302.184	151	-0.435889	0.209592	-2.07971	0.0375525	0.551997	86	92	120	154	136	137	131	200
xan	p<0.05		arf2a	ADP-ribosylation factor 2a	2606.6	506.171	2828.5	-0.249772	0.120145	-2.07893	0.037624	0.552193	2188	2600	2170	2581	2604	2839	2992	2879
xan	p<0.05		bmp7b	bone morphogenetic protein 7b	210.334	239.961	236.5	-0.360343	0.173783	-2.07352	0.0381241	0.558607	164	166	198	208	225	196	267	258
xan	p<0.05		tenm4	teneurin transmembrane protein 4	10.4257	207.763	14.75	-1.43569	0.693136	-2.0713	0.0383309	0.560234	7	5	12	1	21	12	11	15
xan	p<0.05		slc25a10	solute carrier family 25 (mitochondrial carrier; dicarboxylate transporter), member 10	238.257	280.171	267.5	-0.350527	0.169179	-2.07193	0.0382718	0.560234	203	175	219	240	278	231	243	318
xan	p<0.05		zgc:158868	zgc:158868	327.079	315.276	358.5	-0.34804	0.168084	-2.07063	0.0383935	0.560234	529	216	214	223	523	285	306	320
xan	p<0.05		slc37a1	solute carrier family 37 (glucose-6-phosphate transporter), member 1	189.688	250.342	214	-0.369281	0.178447	-2.06942	0.0385069	0.561427	203	155	154	151	260	195	202	199
xan	p<0.05		si:ch211-216b21	#N/A	26.6483	253.382	35	-0.893455	0.431868	-2.06882	0.0385633	0.561561	19	17	25	12	41	22	28	49
xan	p<0.05		zgc:101540	zgc:101540	152.347	391.724	173	-0.39722	0.192031	-2.06852	0.0385912	0.561561	141	96	122	169	177	131	165	219
xan	p<0.05		zyg11	zyg-11 homolog (C. elegans)	373.723	268.882	406	-0.344268	0.166535	-2.06725	0.0387107	0.561729	731	212	253	169	762	280	304	278
xan	p<0.05		btbd10b	BTB (POZ) domain containing 10b	737.809	266.592	807.5	-0.276177	0.13365	-2.06642	0.0387884	0.562289	691	735	602	644	814	842	843	731
xan	p<0.05		hivep1	human immunodeficiency virus type I enhancer binding protein 1	435.441	169.355	490.75	-0.329244	0.159436	-2.06506	0.0389174	0.563698	281	485	277	477	317	501	374	771
xan	p<0.05		ctsd	cathepsin D	867.04	518.237	954.75	-0.280724	0.136149	-2.06189	0.0392185	0.565374	828	764	729	797	975	1101	751	992
xan	p<0.05		si:ch1073-15f19	#N/A	21.697	295.395	27.25	-1.02163	0.495734	-2.06085	0.0393174	0.565445	18	3	14	29	27	23	27	32
xan	p<0.05		eme1	essential meiotic structure-specific endonuclease 1	28.0176	262.434	36.25	-0.854467	0.414603	-2.06093	0.0393099	0.565445	16	9	24	31	28	28	26	63
xan	p<0.05		mcf2la	mcf.2 cell line derived transforming sequence-like a	116.565	349.158	142.5	-0.559405	0.271499	-2.06043	0.0393575	0.565445	79	74	121	88	61	182	141	186
xan	p<0.05		ppp2r3a	protein phosphatase 2, regulatory subunit B'', alpha	331.072	400.368	367.5	-0.403829	0.196151	-2.05876	0.0395171	0.566818	116	469	266	327	204	431	493	342
xan	p<0.05		pfkfb3	6-phosphofructo-2-kinase/fructose-2,6-biphosphatase 3	274.879	463.316	319.25	-0.438052	0.212913	-2.05742	0.0396457	0.568201	236	426	133	128	295	558	113	311
xan	p<0.05		top2a	topoisomerase (DNA) II alpha	119.743	656.75	143.25	-0.491263	0.239127	-2.0544	0.0399368	0.570986	150	93	71	72	261	80	103	129
xan	p<0.05		pkd1l2a	polycystic kidney disease 1 like 2a	5.93971	827.197	9	-1.90256	0.929102	-2.04774	0.0405853	0.575379	4	5	0	2	10	8	8	10
xan	p<0.05		ilf2	interleukin enhancer binding factor 2	690.652	336.697	755.5	-0.270696	0.132208	-2.0475	0.0406088	0.575379	523	680	579	722	647	892	666	817
xan	p<0.05		tfap2a	transcription factor AP-2 alpha	1397.37	771.276	1523.25	-0.260513	0.127183	-2.04833	0.0405275	0.575379	974	1225	1364	1522	1330	1352	1451	1960
xan	p<0.05		srm	spermidine synthase	281.635	336.487	312.75	-0.328531	0.16059	-2.04578	0.0407783	0.576498	292	207	220	283	379	275	283	314
xan	p<0.05		bspry	B-box and SPRY domain containing	47.9909	350.605	59	-0.657184	0.3219	-2.04158	0.0411933	0.579222	28	41	36	44	63	41	64	68
xan	p<0.05		b3gnt5a	UDP-GlcNAc:betaGal beta-1,3-N-acetylglucosaminyltransferase 5a	143.012	1275.79	163	-0.414896	0.203426	-2.03954	0.0413961	0.579438	87	115	149	141	137	139	168	208
xan	p<0.05		ppp4cb	protein phosphatase 4, catalytic subunit b	398.652	608.145	441.5	-0.299625	0.146943	-2.03905	0.0414446	0.579438	631	282	243	268	798	338	288	342
xan	p<0.05		lztfl1	leucine zipper transcription factor-like 1	70.9851	1257.75	86.5	-0.606072	0.297518	-2.0371	0.0416405	0.58129	73	58	50	41	67	101	64	114
xan	p<0.05		ndrg4	NDRG family member 4	440.712	1240.91	489.5	-0.335738	0.164814	-2.03707	0.0416427	0.58129	241	530	429	369	394	604	607	353
xan	p<0.05		rgl3a	ral guanine nucleotide dissociation stimulator-like 3a	155.15	530.368	176.25	-0.39605	0.194699	-2.03416	0.0419351	0.583847	112	161	135	127	137	186	199	183
xan	p<0.05		fryb	furry homolog b (Drosophila)	378.822	1253.8	444	-0.388563	0.191087	-2.03343	0.0420089	0.584099	202	374	298	380	238	346	378	814
xan	p<0.05		thbs1b	thrombospondin 1b	2049.45	571.539	2252.25	-0.270438	0.133032	-2.03287	0.0420652	0.584422	2343	1720	2146	1178	3387	1780	2248	1594
xan	p<0.05		si:ch211-241e1	#N/A	1396.56	569.382	1524.5	-0.275135	0.135448	-2.0313	0.0422248	0.586179	957	1570	1246	1301	1277	1598	1817	1406
xan	p<0.05		pls3	plastin 3 (T isoform)	2378.34	1098.45	2573.25	-0.241085	0.118762	-2.02999	0.0423579	0.587106	2172	2020	2037	2505	2717	2346	2608	2622
xan	p<0.05		rab25a	RAB25, member RAS oncogene family a	186.793	432.592	214.75	-0.441644	0.217597	-2.02965	0.0423926	0.587128	127	186	136	186	208	213	275	163
xan	p<0.05		ajuba	ajuba LIM protein	503.086	733.303	558.75	-0.314512	0.155037	-2.02863	0.0424957	0.587636	497	447	389	458	635	470	628	502
xan	p<0.05		fa2h	fatty acid 2-hydroxylase	541.748	389.5	603.25	-0.324172	0.159904	-2.02729	0.0426327	0.588152	389	591	442	498	486	653	765	509
xan	p<0.05		sox11b	SRY (sex determining region Y)-box 11b	214.993	519.763	241.25	-0.36933	0.18267	-2.02184	0.0431929	0.592403	70	268	198	220	108	349	205	303
xan	p<0.05		tnks1bp1	tankyrase 1 binding protein 1	2478.36	277.5	2834.75	-0.313891	0.155199	-2.0225	0.0431245	0.592403	619	1685	2006	4178	802	2447	1641	6449
xan	p<0.05		sept7a	septin 7a	1497.25	585.145	1620	-0.250661	0.124047	-2.02068	0.0433126	0.592452	1021	1671	1393	1412	1348	1763	1762	1607
xan	p<0.05		si:ch73-338o16	#N/A	299.618	289.132	339.5	-0.400949	0.198634	-2.01853	0.0435359	0.594587	91	430	387	130	114	371	640	233
xan	p<0.05		rhcgl1	Rh family, C glycoprotein, like 1	155.14	1267.74	173.75	-0.408081	0.202473	-2.01549	0.0438537	0.596627	275	80	98	94	312	132	124	127
xan	p<0.05		psmc3	proteasome 26S subunit, ATPase 3	664.915	1747.63	731.5	-0.280123	0.13897	-2.01571	0.0438306	0.596627	500	575	622	695	630	721	630	945
xan	p<0.05		si:dkey-87o1	#N/A	741.009	435.171	844	-0.337019	0.167179	-2.01592	0.0438087	0.596627	584	423	559	987	582	726	536	1532
xan	p<0.05		zgc:174935	zgc:174935	90.8599	1237.05	106.25	-0.472756	0.234649	-2.01474	0.0439321	0.596776	57	80	74	92	81	101	97	146
xan	p<0.05		smek1	SMEK homolog 1, suppressor of mek1 (Dictyostelium)	754.937	1728.7	832	-0.290404	0.144138	-2.01476	0.0439299	0.596776	837	736	584	554	1061	744	667	856
xan	p<0.05		errfi1a	#N/A	253.606	1235.11	284.25	-0.341627	0.170101	-2.00837	0.0446036	0.604043	276	212	242	162	389	229	287	232
xan	p<0.05		g3bp1	GTPase activating protein (SH3 domain) binding protein 1	1721.59	1069.07	1862.75	-0.269917	0.134512	-2.00663	0.0447886	0.605621	2451	1223	1243	1405	2396	1705	1391	1959
xan	p<0.05		slc2a15b	solute carrier family 2 (facilitated glucose transporter), member 15b	75.4394	520.368	87.25	-0.544868	0.271633	-2.0059	0.0448671	0.605818	126	39	40	50	142	59	84	64
xan	p<0.05		sept8a	septin 8a	605.435	510.566	666.75	-0.285375	0.142271	-2.00586	0.0448716	0.605818	453	599	523	600	617	751	523	776
xan	p<0.05		stmn1b	stathmin 1b	30.1581	325.303	37.75	-0.765967	0.382074	-2.00476	0.0449888	0.606938	35	21	13	21	49	38	22	42
xan	p<0.05		rmi2	RecQ mediated genome instability 2	48.766	324.461	59	-0.67322	0.33606	-2.00328	0.0451478	0.608618	53	21	62	19	92	36	57	51
xan	p<0.05		st14a	suppression of tumorigenicity 14 (colon carcinoma) a	668.86	482.237	732.25	-0.272533	0.136113	-2.00225	0.0452582	0.608955	648	626	565	583	672	803	720	734
xan	p<0.05		fsta	follistatin a	40.1848	450.645	49.75	-0.665026	0.332805	-1.99824	0.0456905	0.611741	33	22	34	33	53	29	61	56
xan	p<0.05		per2	period circadian clock 2	479.051	409.474	521.75	-0.329801	0.165036	-1.99836	0.0456775	0.611741	170	694	542	339	288	668	745	386
xan	p<0.05		mcm2	minichromosome maintenance complex component 2	132.499	393.908	153.75	-0.448389	0.224541	-1.99691	0.0458347	0.613208	147	131	102	65	237	146	105	127
xan	p<0.05		ptprk	protein tyrosine phosphatase, receptor type, K	688.402	1726.18	768.5	-0.3151	0.157849	-1.99621	0.0459115	0.613772	560	684	571	619	594	667	942	871
xan	p<0.05		rpz2	rapunzel 2	173.705	501.434	198	-0.375871	0.188471	-1.99432	0.0461171	0.614663	135	143	108	211	153	204	130	305
xan	p<0.05		clta	clathrin, light chain A	526.798	973.355	580.75	-0.2883	0.14454	-1.9946	0.0460862	0.614663	505	467	395	524	547	679	453	644
xan	p<0.05		FO082781	#N/A	32.8286	208.25	40.75	-0.764299	0.384361	-1.98849	0.0467575	0.615643	13	20	31	34	28	52	33	50
xan	p<0.05		avpr1ab	arginine vasopressin receptor 1Ab	62.3681	216.092	74.75	-0.554887	0.279037	-1.98858	0.0467481	0.615643	41	46	53	60	65	50	81	103
xan	p<0.05		skilb	SKI-like proto-oncogene b	89.1987	287.395	104.5	-0.492951	0.24761	-1.99083	0.0464995	0.615643	97	63	98	37	112	78	165	63
xan	p<0.05		si:ch73-347e22	#N/A	152.386	599.447	178.5	-0.411924	0.207004	-1.98993	0.0465983	0.615643	83	110	138	175	96	145	154	319
xan	p<0.05		zgc:171775	zgc:171775	170.15	551.289	193	-0.387285	0.194844	-1.98767	0.0468482	0.615643	171	124	153	141	221	198	211	142
xan	p<0.05		cdon	cell adhesion associated, oncogene regulated	185.358	527.513	209.25	-0.372193	0.187101	-1.98926	0.0466721	0.615643	144	159	183	161	207	239	219	172
xan	p<0.05		bicdl2l	#N/A	377.403	341.039	421.5	-0.313238	0.157329	-1.99098	0.0464834	0.615643	266	230	335	504	346	303	332	705
xan	p<0.05		ftr82	finTRIM family, member 82	408.536	348.566	455	-0.311771	0.15688	-1.98733	0.0468863	0.615643	601	225	345	277	790	279	343	408
xan	p<0.05		ywhaqb	tyrosine 3-monooxygenase/tryptophan 5-monooxygenase activation protein, theta polypeptide b	2759.74	538.303	3010.5	-0.250599	0.125831	-1.99155	0.0464205	0.615643	2059	2282	2160	3534	2479	3213	2141	4209
xan	p<0.05		ywhaz	tyrosine 3-monooxygenase/tryptophan 5-monooxygenase activation protein, zeta polypeptide	16561.9	1468.51	18372.8	-0.267104	0.134041	-1.99271	0.0462936	0.615643	13731	12235	13934	19105	14111	16634	13813	28933
xan	p<0.05		tmed1a	transmembrane p24 trafficking protein 1a	68.6055	355.092	82.5	-0.540636	0.272221	-1.98601	0.0470318	0.616182	39	43	42	96	70	58	46	156
xan	p<0.05		magi1b	membrane associated guanylate kinase, WW and PDZ domain containing 1b	617.778	448.158	679.5	-0.292328	0.147265	-1.98505	0.0471385	0.617124	543	704	506	471	577	766	640	735
xan	p<0.05		psmd12	proteasome 26S subunit, non-ATPase 12	357.179	471.947	395	-0.299998	0.151374	-1.98184	0.0474974	0.619831	322	313	301	341	397	408	329	446
xan	p<0.05		selenow2b	#N/A	894.131	300.908	959.75	-0.293778	0.148251	-1.98163	0.0475204	0.619831	457	722	667	1468	623	1036	861	1319
xan	p<0.05		tmed9	transmembrane p24 trafficking protein 9	442.344	569.513	485.25	-0.284176	0.143658	-1.97814	0.0479127	0.623112	377	400	364	456	478	525	430	508
xan	p<0.05		ppp2r2d	protein phosphatase 2, regulatory subunit B, delta	722.965	314.737	796.5	-0.272074	0.137704	-1.97579	0.048178	0.624745	484	695	619	800	494	822	859	1011
xan	p<0.05		chmp1b	chromatin modifying protein 1B	1111.05	449.855	1209	-0.247023	0.125064	-1.97517	0.0482491	0.624745	1179	830	883	1160	1396	1038	936	1466
xan	p<0.05		itgb6	integrin, beta 6	1812.67	564.605	1960.75	-0.230738	0.116812	-1.9753	0.0482341	0.624745	1244	1505	1848	2062	1388	1858	2101	2496
xan	p<0.05		msmo1	methylsterol monooxygenase 1	1070.71	401.671	1199	-0.311855	0.158085	-1.97271	0.0485286	0.626975	1243	1145	817	565	1979	1161	775	881
xan	p<0.05		ela3l	elastase 3 like	6.86664	179.184	11	-1.79844	0.912692	-1.97048	0.0487833	0.629225	4	2	0	6	5	6	3	30
xan	p<0.05		nqo1	NAD(P)H dehydrogenase, quinone 1	420.494	280.447	469	-0.295866	0.150178	-1.9701	0.0488271	0.629225	206	383	304	596	235	416	399	826
xan	p<0.05		keap1a	kelch-like ECH-associated protein 1a	440.749	313.645	486.75	-0.291812	0.148084	-1.97059	0.0487707	0.629225	384	435	374	386	394	571	474	508
xan	p<0.05		ide	insulin-degrading enzyme	802.886	260.697	879.75	-0.283834	0.144083	-1.96994	0.0488449	0.629225	869	767	697	571	995	773	856	895
xan	p<0.05		creld1b	#N/A	37.4478	235.276	45.75	-0.681401	0.346458	-1.96676	0.0492104	0.632552	44	23	18	30	59	33	35	56
xan	p<0.05		si:ch211-67f13	#N/A	35.7672	310.184	43.75	-0.716967	0.364733	-1.96573	0.0493294	0.633242	8	13	42	47	17	20	66	72
xan	p<0.05		ptp4a2b	protein tyrosine phosphatase type IVA, member 2b	962.573	302.487	1038.25	-0.254038	0.129354	-1.9639	0.0495422	0.634973	1306	899	744	599	1383	1050	934	786
xan	p<0.05		tp53inp2	tumor protein p53 inducible nuclear protein 2	36.9821	235.776	44.75	-0.701685	0.357568	-1.96238	0.0497179	0.636321	21	29	21	46	48	49	36	46
xan	p<0.05		hnrnpk	heterogeneous nuclear ribonucleoprotein K	922.335	278.461	1003.25	-0.267953	0.136546	-1.96237	0.0497193	0.636321	1225	755	710	676	1314	832	1054	813
xan	p<0.05		sucla2	succinate-CoA ligase, ADP-forming, beta subunit	427.496	251.684	468.75	-0.27956	0.142512	-1.96166	0.0498019	0.636457	368	399	414	364	442	489	485	459
xan	p<0.05		pax6a	paired box 6a	1.80604	93.9474	3.5	-3.68833	1.70874	-2.15851	0.0308885	NA	0	0	0	0	2	5	3	4
xan	p<0.05		slc44a5a	solute carrier family 44, member 5a	3.12898	160.224	5	-2.69164	1.34416	-2.00248	0.0452336	NA	0	5	0	0	5	6	2	7
xan	p<0.05		sod3a	superoxide dismutase 3, extracellular a	3.22353	193.842	5	-2.59774	1.31394	-1.97705	0.0480359	NA	0	2	0	3	7	3	3	7
xan	p<0.05		npbwr2a	neuropeptides B/W receptor 2a	3.04648	99.3158	5.25	-3.16571	1.37053	-2.30984	0.0208969	NA	1	0	0	2	8	3	5	5
xan	p<0.05		si:dkey-239n17	#N/A	3.2157	143.566	5.75	-3.60936	1.40876	-2.56209	0.0104045	NA	2	0	0	0	13	4	5	1
xan	p<0.05		ly6m7	#N/A	3.92853	235.197	7.25	-2.84549	1.25283	-2.27126	0.0231314	NA	1	0	3	0	9	2	4	14

## Sheet: Table 2—CRISPR reagents
locus	reagent id	target_1	reagent
adh8a	734	ggGGTTGATGGGGACAAGCG	T7 gRNA
adh8a	735	ggCTCGTGTCCCAGTACGAC	T7 gRNA
aldh1a2	183	GgATGATTCTGTGAGCGGCA	T7 gRNA
aldh1a2	184	gGATGTCCAGGAATCCGACA	T7 gRNA
aldh1a2	45	TTTGACCCAACCACTGAACA	AltR crRNA
aoc1	498	GGTGAGGCCCAGCTCGCTGC	T7 gRNA
aoc1	514	GgACCACCACgCGTGCCTGG	T7 gRNA
aox5	743	GGTGTCTGAGTTyGGCACTG	T7 gRNA
aox5	744	GgTGCCAAACATCACACCgC	T7 gRNA
bco1	476	GgGAGACagCATACAACCAc	T7 gRNA
bco1	477	GGACCCGGCcTGTTCTCgGT	T7 gRNA
bco1	228	CAACCACTGGTTTGATGGAA	AltR crRNA
bco2a	478	GGTGTCTGAGTTyGGCACTG	T7 gRNA
bco2a	479	GgTGCCAAACATCACACCgC	T7 gRNA
bco2a	41	ACCATCCCAACGTGGATACA	AltR crRNA
bco2b	745	ggTGTTATAGTGGTCGTGAT	T7 gRNA
bco2b	746	GGGGATGTTACCTGTTATAG	T7 gRNA
bco2b	42	CAACCACTGGTTTGATGGCA	AltR crRNA
bco2l	114	GAAGGAGCAACTTACAACAT	AltR crRNA
cyp2ae1	224	TTCCAAGCTAGTCCATTATA	AltR crRNA
cyp2ae1	225	AGAGAAAGCAACACTCTTGC	AltR crRNA
cyp2ae1	155	ggATTATAGGGAAGTACGGT	T7 gRNA
cyp2ae1	156	ggTCCGGTCATCAGTATACA	T7 gRNA
cyp2ae2	153	gGTTTCCAACAATAGGCAGA	T7 gRNA
cyp2ae2	154	ggGTTTCCAACAATAGGCAG	T7 gRNA
cyp2ae2	480	GGcAGAGGGAAGGGTCCGGG	T7 gRNA
cyp2ae2	481	GgAGCACAsAGAGAAATATG	T7 gRNA
hand2	500	GgAGTGCGAgTGGTCGAGCC	T7 gRNA
hand2	516	GGGTTCTTCATGACAGCGAC	T7 gRNA
mkxb	750	GgTTGACCAGCTGCGCTTTG	T7 gRNA
mkxb	751	ggAATtcGGAGAGAAGCAGC	T7 gRNA
reg1a	229	TGGTGTGAGTGGACCTGAAA	AltR crRNA
rdh10a	741	GGTGTGCGTGATCACCGGGG	T7 gRNA
rdh10a	742	GGAGAAGAGCGTAGCGGGAC	T7 gRNA
scarb1	754	GCGTCAGTGATGATGGAGAA	T7 gRNA
scarb1	755	GAGGAAGTCCACCAGTTTGC	T7 gRNA
scarb1	227	GGCCCTCTCTGGATCACCAT	AltR crRNA
sfrp5	503	GGAACACCTGCGTGTCAGCG	T7 gRNA
sfrp5	519	GgCGTAGGTCTCCATGACtG	T7 gRNA
spra	732	ggGGGCTCTGGCTCTGTCGG	T7 gRNA
spra	733	ggGGGCCGCGAGCACCAGCA	T7 gRNA
tbx15	737	ggGTGAAGGGTCGCAGGCGG	T7 gRNA
tbx15	738	ggGCTCGTTCGGCTCCGCGG	T7 gRNA
xdh	739	ggATCTCTATTGTCACGTGT	T7 gRNA
xdh	740	ggAGTACAGTGCAGAATATT	T7 gRNA
zdhhc2	497	GgTCAGACTGATGAACAGCA	T7 gRNA
zdhhc2	513	GgAGACAcCGATCACAGTAG	T7 gRNA
bdh1a	496	GgGACTGGGGCGAGACGGAG	T7 gRNA
bdh1a	512	GgCGGAGTGGAGTACGGCTG	T7 gRNA
zgc:172053	506	GGCCAtGATGGTGAAcAaGT	T7 gRNA
zgc:172053	522	GgCCTACtTgTTCACCATCa	T7 gRNA
sat2a	502	GGACATTTCTCGGATGATAC	T7 gRNA
sat2a	518	GgAtTGATAGCCGAGTTCAG	T7 gRNA
mc5ra	505	GgGACCACCCTGCCCTTCTG	T7 gRNA
mc5ra	521	GGTGAGCGTCTCCAAtGCGT	T7 gRNA
mc5ra	230	GCCAAGGATGAGGAACACCT	AltR crRNA

## Sheet: Table 3—F0 phenotypes
locus	erythrophore or xanthophore phenotype
adh8a	—
aldh1a2	—
aoc1	—
aox5	—
bco1	red, yellow depletion
bco2a	—
bco2b	—
bco2l	—
bco2a, bco2b, bco2l	—
cyp2ae1	—
cyp2ae2	red > yellow
hand2	—
mc5ra	—
mkxb	—
reg1a	fewer iridophores on body
rdh10a	early lethal
sat2	—
scarb1	red, yellow loss
sfrp5	early lethal
spra	—
tbx15	—
wu:fc46h12	—
xdh	—
zdhhc2	—
bdh1a	red > yellow
zgc:172053	early lethal

## Sheet: Table 4—HPLC analyses
	Table 5. Retention time, spectral absorbance peaks, and mean ± SD concentrations (n = 3) of the major carotenoid peaks observed in the red and yellow fin portions of wild-type and various mutant D. albolineatus as measured by reverse phase HPLC. Peaks 1-6 have a single relatively long-wavelength absorbance peak that is typical of extended conjugated system of C4-ketocarotenoids, including astaxan…
				Mean ± SD concentration (µg mg-1 of protein)
				wild type		scarb1		bco1		cyp2ae2		bdh1
		Retention Time (min)	Spectral Absorbance Peak(s) (nm)	Red fin	Yellow fin	Red fin	Yellow fin	Red fin	Yellow fin	Red fin	Yellow fin	Red fin	Yellow fin
	Peak1	6.1	369, 472	0.185 ± 0.076	0.027 ± 0.024	-	-	-	-	-	-	-	-
	Peak2	6.5	369, 472	0.758 ± 0.262	-	-	-	0.023 ± 0.013	-	-	-	-	-
	Peak3 - astaxanthin	7.1	478	3.975 ± 1.451	0.049 ± 0.043	-	-	0.088 ± 0.044	-	0.063 ± 0.054	-	-	-
	Peak4	7.6	482	0.419 ± 0.131	-	-	-	-	-	-	-	-	-
	Peak5	8.4	481	0.299 ± 0.045	-	-	-	0.027 ± 0.013	-	0.042 ± 0.025	-	-	-
	Peak6	9.2	472	0.488 ± 0.216	-	-	-	0.015 ± 0.017	-	-	-	-	-
	Peak7	5.2	(428),451,468	0.038 ± 0.009	0.31 ± 0.238	-	-	-	0.009 ± 0.004	-	-	0.015 ± 0.002	0.035 ± 0.014
	Peak8	6.2	(428),452,479	-	0.075 ± 0.048	-	-	-	-	-	-	-	-
	Peak9	7.6	(428),451,477	-	0.091 ± 0.049	-	-	-	0.01 ± 0.005	0.056 ± 0.039	0.092 ± 0.034	0.021 ± 0.004	0.057 ± 0.019
	Peak10 - zeaxanthin	9.5	(428),454,480	-	0.091 ± 0.048	-	-	-	-	0.224 ± 0.188	0.167 ± 0.02	0.041 ± 0.01	0.109 ± 0.039
	Peak11	7.2	(424).446,475	-	-	-	-	-	-	0.065 ± 0.046	0.069 ± 0.022	-	-
	Peak12	6.8	(424),454,480	-	-	-	-	-	0.002 ± 0.003	-	-	0.02 ± 0.003	0.045 ± 0.002
	Standards:
	Lutein	7.4	(425),446,475	-	-	-	-	-	-	-	-	-	-
	Zeaxanthin	9.5	(428),454,480	-	-	-	-	-	-	-	-	-	-
	Canthaxanthin	10.7	476	-	-	-	-	-	-	-	-	-	-
	Astaxanthin	7.1	478	-	-	-	-	-	-	-	-	-	-
	β-carotene	23.2	(428),454,480	-	-	-	-	-	-	-	-	-	-

## Sheet: Table 5—RT-PCR primer sets
gene	forwards (5'-3')	reverse (5'-3')	amplicon length	target site notes
bdh1a	GAGTCACCATCGCATTCCTG	TATCCTCAAGCAGTCCGCAA	152	spans long intron
cyp2ae2	ACAAAGCGAGCGAGGTCTGC	ACAGATCCAGCACACAGTGA	413	exon/intron junction
actb2	AGGCTGTGCTGTCCCTGTAT	ACCGCACGATTCCATACCCAAGAAGG	410	exon/intron junction
scarb1	GTTCTGGGAGGCATGGCGTT	GCTCTCCCACCGGTTTGGTC	493	exon/intron junction
bco1	CCCTTAGTGACCAGGGTGAG	TGGCGTCAAGCACCAGTAGA	393	exon/intron junction
tyrp1b	TGCAACGGAAACTTCACTGG	AGCATGTCCTGCATGTCTCT	416	exon/intron junction
oacyl	GCAAGCAGCAGGGCCTCTCA	TCAGAAGACCACCCAGCACCA	306	exon/intron junction

## Sheet: Table 6—Figure 2D,E
ID	fish ID	cell ID	H	log2(R/G)	position on fin
1	1	1	25	-1.70623	0.616825
2	1	2	36	-2.34346	0.610952
3	1	3	14	0.673762	0.604127
4	1	4	16	0.543753	0.593016
5	1	5	12	0.893424	0.589048
6	1	6	11	1.60847	0.569683
7	1	7	3	1.21488	0.545873
8	1	8	2	1.74139	0.477937
9	1	9	6	0.982916	0.466667
10	1	10	2	1.0285	0.455556
11	1	11	4	1.93076	0.452381
12	1	12	2	1.6721	0.440635
13	1	13	11	1.00614	0.346349
14	1	14	12	1.19818	0.35254
15	1	15	15	1.53631	0.380794
16	1	16	7	1.07074	0.388254
17	1	17	4	1.41167	0.387302
18	1	18	15	1.31424	0.402857
19	1	19	15	0.780388	0.410952
20	1	20	12	1.3093	0.411746
21	1	21	10	1.56766	0.421429
22	1	22	6	1.3833	0.33
23	1	23	10	1.49046	0.306825
24	1	24	9	0.988301	0.30127
25	1	25	13	0.955491	0.323651
26	1	26	12	1.08864	0.279365
27	1	27	7	1.23009	0.167778
28	1	28	4	1.35949	0.205397
29	1	29	1	1.46731	0.214286
30	1	30	8	1.19314	0.229048
31	1	31	5	1.52831	0.239365
32	1	32	14	1.23079	0.128095
33	1	33	25	-0.634076	0.632247
34	1	34	46	-2.63803	0.656131
35	1	35	45	-2.66463	0.663543
36	1	36	50	-3.03554	0.682938
37	1	37	46	-2.93939	0.742655
38	1	38	48	-2.49623	0.754298
39	1	39	34	-2.24431	0.773385
40	1	40	31	-2.14421	0.788754
41	1	41	42	-2.88079	0.850572
42	1	42	39	-2.51548	0.837763
43	1	43	37	-2.39133	0.855886
44	1	44	35	-2.84972	0.876203
45	1	45	41	-2.54064	0.89638
46	1	46	41	-2.54654	0.906023
47	1	47	45	-2.83032	0.925736
48	1	48	43	-2.59985	0.934329
49	1	49	44	-2.77964	0.940939
50	1	50	46	-3.16489	0.975918
51	2	1	14	0.368719	0.537594
52	2	2	46	-2.28321	0.532334
53	2	3	49	-2.15484	0.52377
54	2	4	21	0.282553	0.520618
55	2	5	29	-0.418133	0.51214
56	2	6	30	-0.0753039	0.508505
57	2	7	44	-2.19262	0.493143
58	2	8	18	1.45986	0.487898
59	2	9	16	1.27837	0.48267
60	2	10	17	1.48044	0.461031
61	2	11	22	1.14297	0.443403
62	2	12	48	-2.27812	0.546672
63	2	13	44	-2.15515	0.553521
64	2	14	53	-2.72695	0.570791
65	2	15	57	-2.71549	0.578727
66	2	16	52	-2.50623	0.586433
67	2	17	58	-2.60226	0.599284
68	2	18	16	1.0795	0.415648
69	2	19	16	1.14523	0.409224
70	2	20	18	1.01242	0.396693
71	2	21	22	0.896347	0.389345
72	2	22	17	1.31087	0.373306
73	2	23	10	0.816118	0.364876
74	2	24	19	1.06631	0.354644
75	2	25	15	1.19255	0.34819
76	2	26	18	0.962037	0.331778
77	2	27	9	1.22674	0.314171
78	2	28	8	1.07749	0.284174
79	2	29	13	1.05144	0.276403
80	2	30	15	1.0119	0.230902
81	2	31	11	1.1297	0.213452
82	2	32	10	1.12263	0.193665
83	2	33	13	0.84482	0.17375
84	2	34	56	-3.00737	0.615608
85	2	35	57	-2.80444	0.632917
86	2	36	54	-2.96743	0.639849
87	2	37	51	-2.79828	0.672007
88	2	38	48	-2.56592	0.714373
89	2	39	51	-2.70941	0.727623
90	2	40	47	-2.40712	0.740314
91	2	41	53	-2.68735	0.747976
92	2	42	48	-2.76626	0.754842
93	2	43	54	-2.28274	0.769241
94	2	44	49	-2.90328	0.817221
95	2	45	53	-3.30691	0.835429
96	2	46	49	-3.52998	0.848484
97	2	47	50	-3.65903	0.858618
98	2	48	51	-3.68542	0.877553
99	2	49	54	-3.23597	0.899964
100	2	50	57	-2.67506	0.926282
101	3	1	4	1.49553	0.40164
102	3	2	11	1.44581	0.384262
103	3	3	15	0.185002	0.372205
104	3	4	5	1.10695	0.367704
105	3	5	6	1.32157	0.356693
106	3	6	14	0.876012	0.352482
107	3	7	19	0.806215	0.342416
108	3	8	14	1.33277	0.330845
109	3	9	7	1.41199	0.315387
110	3	10	10	1.32208	0.306683
111	3	11	12	1.26118	0.295934
112	3	12	9	1.43789	0.283061
113	3	13	3	1.17135	0.273057
114	3	14	38	-0.910645	0.98394
115	3	15	39	-1.47026	0.970791
116	3	16	38	-1.56568	0.959491
117	3	17	34	-1.06795	0.9564
118	3	18	44	-1.77445	0.945706
119	3	19	40	-2.61216	0.939679
120	3	20	43	-2.26984	0.935044
121	3	21	36	-0.847272	0.931967
122	3	22	44	-2.86123	0.921566
123	3	23	40	-1.71863	0.921492
124	3	24	50	-3.35351	0.906079
125	3	25	44	-1.6747	0.907468
126	3	26	49	-2.08792	0.899985
127	3	27	42	-2.50435	0.892478
128	3	28	41	-2.28469	0.892893
129	3	29	48	-3.01218	0.886504
130	3	30	41	-2.42363	0.881895
131	3	31	41	-2.09215	0.86953
132	3	32	54	-2.8218	0.857438
133	3	33	37	-1.99092	0.849885
134	3	34	37	-2.26198	0.853316
135	3	35	45	-1.44129	0.838163
136	3	36	43	-2.36503	0.831407
137	3	37	46	-3.02487	0.826215
138	3	38	35	-2.64585	0.821463
139	3	39	41	-2.93476	0.809908
140	3	40	46	-2.97186	0.607399
141	3	41	50	-2.91686	0.629827
142	3	42	46	-3.02778	0.709082
143	3	43	41	-2.58545	0.717442
144	3	44	45	-3.01642	0.726747
145	3	45	56	-3.0302	0.740167
146	3	46	45	-2.80608	0.782775
147	3	47	47	-2.24335	0.788653
148	3	48	40	-1.98988	0.778135
149	3	49	53	-2.19687	0.77162
150	3	50	34	-2.6407	0.763841
151	4	1	23	1.00421	0.500707
152	4	2	22	0.398339	0.493821
153	4	3	14	1.31727	0.481011
154	4	4	9	1.37311	0.467773
155	4	5	8	1.12431	0.457367
156	4	6	17	1.58688	0.441507
157	4	7	18	1.54379	0.434762
158	4	8	54	-3.14065	0.510485
159	4	9	52	-2.74836	0.525484
160	4	10	51	-2.55037	0.540221
161	4	11	59	-2.85161	0.559014
162	4	12	52	-3.12685	0.576232
163	4	13	46	-3.11007	0.579647
164	4	14	55	-3.25542	0.589248
165	4	15	58	-2.89169	0.603606
166	4	16	58	-2.97367	0.609897
167	4	17	47	-3.03357	0.903414
168	4	18	44	-3.82596	0.897013
169	4	19	42	-2.95202	0.887087
170	4	20	46	-3.82563	0.879504
171	4	21	50	-3.14191	0.870302
172	4	22	53	-3.72936	0.863782
173	4	23	52	-3.37655	0.855975
174	4	24	48	-2.93597	0.84765
175	4	25	57	-3.58464	0.834443
176	4	26	51	-3.89491	0.828384
177	4	27	45	-3.74216	0.823343
178	4	28	51	-2.71565	0.811969
179	4	29	55	-2.69363	0.807003
180	4	30	55	-3.40426	0.792801
181	4	31	51	-3.58439	0.781879
182	4	32	48	-3.19343	0.774528
183	4	33	54	-3.7222	0.762647
184	4	34	57	-3.55703	0.753966
185	4	35	54	-2.71339	0.740871
186	4	36	56	-3.20724	0.692281
187	4	37	52	-3.26801	0.686623
188	4	38	23	0.779209	0.424639
189	4	39	14	1.04692	0.414936
190	4	40	15	1.19837	0.391875
191	4	41	10	0.932339	0.387118
192	4	42	6	1.10977	0.371271
193	4	43	22	0.989864	0.351396
194	4	44	14	1.17286	0.337079
195	4	45	15	1.12452	0.320685
196	4	46	10	1.11954	0.303169
197	4	47	13	0.977037	0.273383
198	4	48	12	1.14633	0.26357
199	4	49	9	0.981854	0.245902
200	4	50	4	1.28257	0.216908
201	5	1	17	0.0393214	0.584131
202	5	2	38	-2.3709	0.588463
203	5	3	55	-3.03345	0.593693
204	5	4	54	-2.83678	0.603643
205	5	5	59	-2.39434	0.618198
206	5	6	54	-3.02141	0.628073
207	5	7	57	-2.5892	0.634552
208	5	8	58	-2.70137	0.645081
209	5	9	48	-1.58487	0.658524
210	5	10	58	-2.99577	0.667819
211	5	11	55	-3.0851	0.684834
212	5	12	55	-3.012	0.696061
213	5	13	54	-3.22757	0.705582
214	5	14	58	-2.99741	0.717148
215	5	15	58	-2.96402	0.727018
216	5	16	55	-3.36606	0.738569
217	5	17	58	-3.15019	0.746548
218	5	18	59	-3.43498	0.762389
219	5	19	60	-3.82111	0.776717
220	5	20	60	-3.55967	0.782301
221	5	21	60	-2.99507	0.80594
222	5	22	59	-3.37771	0.832685
223	5	23	54	-2.96744	0.852129
224	5	24	60	-3.34583	0.876101
225	5	25	59	-3.16443	0.88899
226	5	26	52	-3.018	0.897836
227	5	27	56	-2.97999	0.922842
228	5	28	58	-3.07993	0.9281
229	5	29	4	1.71989	0.547308
230	5	30	6	1.10915	0.53984
231	5	31	7	1.10774	0.522834
232	5	32	6	1.15795	0.50543
233	5	33	13	1.25181	0.489241
234	5	34	3	1.34691	0.482311
235	5	35	17	1.44791	0.452362
236	5	36	11	1.18654	0.432229
237	5	37	7	1.58841	0.404375
238	5	38	11	1.32475	0.395746
239	5	39	4	1.40685	0.377483
240	5	40	14	1.38885	0.365447
241	5	41	9	1.25881	0.356748
242	5	42	2	1.44794	0.255354
243	5	43	1	1.5704	0.235305
244	5	44	2	1.15689	0.220082
245	5	45	8	1.27086	0.199487
246	5	46	6	1.30966	0.188628
247	5	47	4	1.42589	0.183004
248	5	48	5	1.34905	0.166504
249	5	49	4	1.23215	0.154695
250	5	50	7	1.27965	0.136179

## Sheet: Table 7—Figure 2F,S1D
ID	SL (mm)	log2 R/G	mean density (cells / 100 um2)	position
1	11.142	-1.07073	7	proximal
2	9.187	-0.26352	9.33333	proximal
3	13.319	-0.42109	6.33333	proximal
4	9.654	-0.29578	6.83333	proximal
5	12.633	0.205642	7	proximal
6	15.895	0.283756	19.1667	proximal
7	9.726	-0.91219	6.5	proximal
8	10.998	0.47577	7.83333	proximal
9	13.204	-0.11568	7.33333	proximal
10	11.941	0.284947	11.5	proximal
11	11.312	0.228057	8.66667	proximal
12	16.375	0.815413	18.6667	proximal
13	14.842	0.086423	5.16667	proximal
14	16.867	0.560376	6.83333	proximal
15	11.55	1.02307	5.33333	proximal
16	10.366	-0.08463	7	proximal
17	12.061	0.132209	7	proximal
18	10.612	0.231978	11.3333	proximal
19	10.755	0.546087	8.16667	proximal
20	10.808	0.610517	11.3333	proximal
21	15.225	0.37352	8.33333	proximal
22	17.151	0.461771	19	proximal
23	18.612	0.391219	12.3333	proximal
24	15.375	0.140554	28.5	proximal
25	10.979	-0.21316	11.8333	proximal
26	8.417	0.368828	25.3333	proximal
27	8.626	-0.57371	13.3333	proximal
28	8.866	-0.03396	28.75	proximal
29	9.927	-0.22856	8.16667	proximal
30	9.476	0.367001	13.8333	proximal
31	10.962	-0.32642	7.33333	proximal
32	11.142	-3.56468	9.16667	distal
33	9.187	-1.13333	8.66667	distal
34	13.319	-3.14961	10.8333	distal
35	9.654	-2.4869	4.83333	distal
36	12.633	-3.07076	6.83333	distal
37	15.895	-2.8997	9.16667	distal
38	9.726	-2.49994	18.8333	distal
39	10.998	-1.524	7.5	distal
40	13.204	-2.77054	12.5	distal
41	11.941	-2.54	9	distal
42	11.312	-3.31002	19.5	distal
43	16.375	-2.79952	10.8333	distal
44	14.842	-2.74526	26.6667	distal
45	16.867	-2.93584	11	distal
46	11.55	-1.88136	18.8333	distal
47	10.366	-3.06782	10.6667	distal
48	12.061	-1.9135	16.8333	distal
49	10.612	-1.45943	6.5	distal
50	10.755	-2.02349	14	distal
51	10.808	-1.47046	6.83333	distal
52	15.225	-3.03682	6.5	distal
53	17.151	-3.07831	8.5	distal
54	18.612	-3.25803	7.83333	distal
55	15.375	-3.91177	8.83333	distal
56	10.979	-2.4379	9.5	distal
57	8.417	0.076459	9	distal
58	8.626	-0.48063	8.16667	distal
59	8.866	-1.21786	10.3333	distal
60	9.927	-1.2939	8.33333	distal
61	9.476	-1.07241	9.16667	distal
62	10.962	-2.61721	10.6667	distal

## Sheet: Table 8—Figure 4C
init position	init color	init stage	clones
			eryth only	xan only	both	total
distal	none	7	3	0	4	7
proximal	orange	7.5	16	0	0	16
distal	orange	7.5	12	2	8	22
distal	none	8.5	0	11	0	11

## Sheet: Table 9—Figure 5C
fish ID	position	un-converted cells	converted cells	total cells	percent converted	mean percent converted
1	1	38	31	69	0.449275	0.401958
1	2	42	22	64	0.34375
1	3	50	35	85	0.411765
1	4	50	33	83	0.39759
1	5	48	33	81	0.407407
2	1	38	29	67	0.432836	0.478032
2	2	47	54	101	0.534653
2	3	75	47	122	0.385246
2	4	56	62	118	0.525424
2	5	61	64	125	0.512
3	1	37	22	59	0.372881	0.408062
3	2	29	31	60	0.516667
3	3	25	17	42	0.404762
3	4	50	27	77	0.350649
3	5	52	34	86	0.395349
4	1	76	97	173	0.560694	0.526929
4	2	90	101	191	0.528796
4	3	68	77	145	0.531034
4	4	46	55	101	0.544554
4	5	61	54	115	0.469565

## Sheet: Table 10—Figure 7D,E
ID	genotype	sex	fish ID	region	cell ID	log2(R/G)	diameter (μm)
1	wt	male	1	proximal	1	1.46206	10.1261
2	wt	male	1	proximal	2	1.03385	10.2499
3	wt	male	1	proximal	3	1.69989	10.6322
4	wt	male	1	proximal	4	1.06134	12.4527
5	wt	male	1	proximal	5	1.4668	13.3604
6	wt	male	1	proximal	6	1.70451	13.3642
7	wt	male	1	proximal	7	1.33063	13.4894
8	wt	male	1	proximal	8	1.01658	13.7822
9	wt	male	1	proximal	9	1.28149	13.9639
10	wt	male	1	proximal	10	0.937684	14.2174
11	wt	male	1	proximal	11	1.47525	14.2174
12	wt	male	1	proximal	12	1.34534	14.3781
13	wt	male	1	proximal	13	1.62274	14.6379
14	wt	male	1	proximal	14	1.23329	14.8724
15	wt	male	1	proximal	15	1.24493	14.9647
16	wt	male	1	proximal	16	1.05672	16.2771
17	wt	male	1	proximal	17	1.28327	16.9666
18	wt	male	1	proximal	18	1.34627	17.4302
19	wt	male	1	proximal	19	1.55488	18.6987
20	wt	male	1	proximal	20	1.07882	19.3979
21	wt	male	1	distal	1	-2.47989	8.3976
22	wt	male	1	distal	2	-2.10435	6.80204
23	wt	male	1	distal	3	-2.47976	6.75128
24	wt	male	1	distal	4	-2.14597	7.03817
25	wt	male	1	distal	5	-2.08805	7.6472
26	wt	male	1	distal	6	-2.53746	6.45165
27	wt	male	1	distal	7	-2.18258	7.96666
28	wt	male	1	distal	8	-2.04233	6.75128
29	wt	male	1	distal	9	-2.28189	9.20845
30	wt	male	1	distal	10	-2.17279	7.6472
31	wt	male	1	distal	11	-1.98417	8.21119
32	wt	male	1	distal	12	-1.93962	8.54983
33	wt	male	1	distal	13	-2.64546	13.685
34	wt	male	1	distal	14	-2.6153	12.9104
35	wt	male	1	distal	15	-2.43108	12.6822
36	wt	male	1	distal	16	-2.2394	11.5216
37	wt	male	1	distal	17	-2.43467	12.4587
38	wt	male	1	distal	18	-2.51832	9.40612
39	wt	male	1	distal	19	-2.5894	9.46086
40	wt	male	1	distal	20	-2.77741	8.93692
41	wt	male	2	proximal	1	1.14703	20.2616
42	wt	male	2	proximal	2	1.16701	18.4918
43	wt	male	2	proximal	3	1.15504	13.5433
44	wt	male	2	proximal	4	1.17486	17.5379
45	wt	male	2	proximal	5	1.18527	11.6168
46	wt	male	2	proximal	6	1.2862	15.8102
47	wt	male	2	proximal	7	1.14536	16.1379
48	wt	male	2	proximal	8	1.13974	16.2228
49	wt	male	2	proximal	9	1.298	16.6782
50	wt	male	2	proximal	10	1.31284	15.5347
51	wt	male	2	proximal	11	1.29615	16.4789
52	wt	male	2	proximal	12	1.26772	10.3056
53	wt	male	2	proximal	13	0.954648	15.5537
54	wt	male	2	proximal	14	1.09353	22.0613
55	wt	male	2	proximal	15	1.39292	11.0531
56	wt	male	2	proximal	16	1.0959	12.0603
57	wt	male	2	proximal	17	0.99185	14.5511
58	wt	male	2	proximal	18	1.04104	16.4354
59	wt	male	2	proximal	19	0.915216	11.1523
60	wt	male	2	proximal	20	0.881166	10.8367
61	wt	male	2	distal	1	-3.31758	14.1609
62	wt	male	2	distal	2	-3.07656	14.521
63	wt	male	2	distal	3	-3.32747	14.9647
64	wt	male	2	distal	4	-3.13353	18.5403
65	wt	male	2	distal	5	-3.43685	13.6975
66	wt	male	2	distal	6	-3.1737	14.1609
67	wt	male	2	distal	7	-3.1501	15.2326
68	wt	male	2	distal	8	-3.15832	12.2022
69	wt	male	2	distal	9	-3.27067	13.8164
70	wt	male	2	distal	10	-3.50507	14.3781
71	wt	male	2	distal	11	-2.59472	9.97454
72	wt	male	2	distal	12	-3.11691	13.0277
73	wt	male	2	distal	13	-3.52878	12.1172
74	wt	male	2	distal	14	-3.32914	11.8805
75	wt	male	2	distal	15	-3.16962	14.6684
76	wt	male	2	distal	16	-3.49314	13.2828
77	wt	male	2	distal	17	-3.1611	12.7809
78	wt	male	2	distal	18	-3.27133	11.5051
79	wt	male	2	distal	19	-3.09289	15.4347
80	wt	male	2	distal	20	-3.091	14.402
81	wt	male	3	proximal	1	1.29725	14.1305
82	wt	male	3	proximal	2	1.54617	14.402
83	wt	male	3	proximal	3	1.18652	14.9647
84	wt	male	3	proximal	4	1.3032	17.6412
85	wt	male	3	proximal	5	1.37244	13.2309
86	wt	male	3	proximal	6	1.14109	16.1593
87	wt	male	3	proximal	7	1.56255	16.0094
88	wt	male	3	proximal	8	1.56779	11.7494
89	wt	male	3	proximal	9	1.47801	13.2309
90	wt	male	3	proximal	10	1.20863	13.6093
91	wt	male	3	proximal	11	1.37641	12.3145
92	wt	male	3	proximal	12	1.36563	19.671
93	wt	male	3	proximal	13	1.57562	17.1514
94	wt	male	3	proximal	14	1.25687	13.5077
95	wt	male	3	proximal	15	1.216	11.0472
96	wt	male	3	proximal	16	1.70686	13.5077
97	wt	male	3	proximal	17	1.08736	16.7452
98	wt	male	3	proximal	18	1.34062	19.5041
99	wt	male	3	proximal	19	1.20126	14.3781
100	wt	male	3	proximal	20	1.47891	15.7711
101	wt	male	3	distal	1	-3.37858	15.7728
102	wt	male	3	distal	2	-2.9281	11.0257
103	wt	male	3	distal	3	-2.81882	10.6914
104	wt	male	3	distal	4	-2.88517	13.6916
105	wt	male	3	distal	5	-2.44708	11.0013
106	wt	male	3	distal	6	-3.19987	12.107
107	wt	male	3	distal	7	-3.43553	12.107
108	wt	male	3	distal	8	-2.74377	14.3064
109	wt	male	3	distal	9	-3.41414	9.1751
110	wt	male	3	distal	10	-2.95491	10.3722
111	wt	male	3	distal	11	-3.27741	14.1077
112	wt	male	3	distal	12	-2.7242	13.5733
113	wt	male	3	distal	13	-2.80375	12.1514
114	wt	male	3	distal	14	-2.67576	9.96213
115	wt	male	3	distal	15	-3.06883	12.4682
116	wt	male	3	distal	16	-3.0045	10.6914
117	wt	male	3	distal	17	-3.45361	11.0987
118	wt	male	3	distal	18	-2.96755	7.77911
119	wt	male	3	distal	19	-2.96829	9.07193
120	wt	male	3	distal	20	-3.2327	12.8819
121	wt	male	4	proximal	1	1.12799	12.8819
122	wt	male	4	proximal	2	0.925104	10.0695
123	wt	male	4	proximal	3	1.08725	12.9652
124	wt	male	4	proximal	4	1.28425	10.6914
125	wt	male	4	proximal	5	1.44629	11.7576
126	wt	male	4	proximal	6	1.35069	10.2679
127	wt	male	4	proximal	7	1.27373	8.44232
128	wt	male	4	proximal	8	1.23325	10.94
129	wt	male	4	proximal	9	1.01397	11.0257
130	wt	male	4	proximal	10	0.850878	14.3064
131	wt	male	4	proximal	11	1.25378	11.135
132	wt	male	4	proximal	12	1.18091	11.3858
133	wt	male	4	proximal	13	1.01243	10.6914
134	wt	male	4	proximal	14	1.33001	11.6543
135	wt	male	4	proximal	15	1.08183	12.9652
136	wt	male	4	proximal	16	1.26678	17.1219
137	wt	male	4	proximal	17	1.13462	15.2527
138	wt	male	4	proximal	18	0.881076	11.0013
139	wt	male	4	proximal	19	1.18941	11.8374
140	wt	male	4	proximal	20	1.45244	8.83157
141	wt	male	4	distal	1	-3.01784	14.1077
142	wt	male	4	distal	2	-3.48476	13.809
143	wt	male	4	distal	3	-2.79143	17.2393
144	wt	male	4	distal	4	-2.71753	19.2933
145	wt	male	4	distal	5	-3.62684	15.7728
146	wt	male	4	distal	6	-3.49171	15.5582
147	wt	male	4	distal	7	-2.74383	20.0185
148	wt	male	4	distal	8	-3.3701	12.9963
149	wt	male	4	distal	9	-3.21973	11.4211
150	wt	male	4	distal	10	-3.85065	13.4638
151	wt	male	4	distal	11	-3.40108	12.9652
152	wt	male	4	distal	12	-3.70389	13.6916
153	wt	male	4	distal	13	-3.07894	12.8819
154	wt	male	4	distal	14	-3.5491	12.107
155	wt	male	4	distal	15	-3.52386	9.96213
156	wt	male	4	distal	16	-2.72827	10.2941
157	wt	male	4	distal	17	-3.59737	13.9543
158	wt	male	4	distal	18	-3.25735	12.6608
159	wt	male	4	distal	19	-3.21965	12.1514
160	wt	male	4	distal	20	-3.26688	12.9963
161	wt	male	5	proximal	1	1.14063	11.0987
162	wt	male	5	proximal	2	1.22538	9.07193
163	wt	male	5	proximal	3	1.1761	13.6128
164	wt	male	5	proximal	4	1.1317	12.6608
165	wt	male	5	proximal	5	1.31141	9.90798
166	wt	male	5	proximal	6	1.28112	10.6914
167	wt	male	5	proximal	7	1.2865	8.92246
168	wt	male	5	proximal	8	1.25367	7.70966
169	wt	male	5	proximal	9	1.4196	9.56265
170	wt	male	5	proximal	10	1.10302	11.374
171	wt	male	5	proximal	11	1.37163	11.535
172	wt	male	5	proximal	12	1.2229	11.1634
173	wt	male	5	proximal	13	1.44333	10.3056
174	wt	male	5	proximal	14	1.23369	8.80106
175	wt	male	5	proximal	15	1.39296	14.0817
176	wt	male	5	proximal	16	1.20241	10.8586
177	wt	male	5	proximal	17	1.37487	12.3772
178	wt	male	5	proximal	18	1.50027	9.46086
179	wt	male	5	proximal	19	1.16263	10.3056
180	wt	male	5	proximal	20	1.16683	10.397
181	wt	male	5	distal	1	-3.3103	13.8102
182	wt	male	5	distal	2	-3.00623	13.9157
183	wt	male	5	distal	3	-2.75672	10.8903
184	wt	male	5	distal	4	-3.04512	12.1172
185	wt	male	5	distal	5	-2.54596	12.9216
186	wt	male	5	distal	6	-3.25055	10.5776
187	wt	male	5	distal	7	-2.58724	13.2309
188	wt	male	5	distal	8	-3.34241	9.99178
189	wt	male	5	distal	9	-3.16988	11.0472
190	wt	male	5	distal	10	-2.82771	12.6183
191	wt	male	5	distal	11	-3.11328	9.90798
192	wt	male	5	distal	12	-3.46891	11.0013
193	wt	male	5	distal	13	-3.63021	12.3707
194	wt	male	5	distal	14	-3.36524	13.0891
195	wt	male	5	distal	15	-3.14867	13.2219
196	wt	male	5	distal	16	-3.47743	14.7416
197	wt	male	5	distal	17	-3.70466	12.1514
198	wt	male	5	distal	18	-3.39064	12.107
199	wt	male	5	distal	19	-2.91682	12.9652
200	wt	male	5	distal	20	-3.22583	13.2016
201	wt	female	1	proximal	1	0.729136	6.42399
202	wt	female	1	proximal	2	0.881181	6.36301
203	wt	female	1	proximal	3	1.02354	5.29267
204	wt	female	1	proximal	4	0.992463	5.27901
205	wt	female	1	proximal	5	0.76849	5.20186
206	wt	female	1	proximal	6	0.788039	7.33885
207	wt	female	1	proximal	7	0.671256	5.0526
208	wt	female	1	proximal	8	0.942428	7.00669
209	wt	female	1	proximal	9	0.623326	9.01479
210	wt	female	1	proximal	10	0.768537	6.37265
211	wt	female	1	proximal	11	1.0657	6.46055
212	wt	female	1	proximal	12	0.875646	5.25931
213	wt	female	1	proximal	13	0.794473	7.35261
214	wt	female	1	proximal	14	0.0504704	6.02739
215	wt	female	1	proximal	15	0.206592	6.76769
216	wt	female	1	proximal	16	1.16405	8.23928
217	wt	female	1	proximal	17	1.10164	6.96403
218	wt	female	1	proximal	18	0.735527	6.45869
219	wt	female	1	proximal	19	0.872566	6.7016
220	wt	female	1	proximal	20	0.854847	5.68253
221	wt	female	1	distal	1	-3.875	11.515
222	wt	female	1	distal	2	-3.68803	13.2219
223	wt	female	1	distal	3	-3.57783	13.9639
224	wt	female	1	distal	4	-3.80192	15.5409
225	wt	female	1	distal	5	-3.42872	20.2523
226	wt	female	1	distal	6	-3.28703	16.0098
227	wt	female	1	distal	7	-3.72385	11.7576
228	wt	female	1	distal	8	-3.25925	13.6128
229	wt	female	1	distal	9	-3.10101	15.4019
230	wt	female	1	distal	10	-3.86417	9.90798
231	wt	female	1	distal	11	-3.74734	10.3722
232	wt	female	1	distal	12	-3.93698	11.7347
233	wt	female	1	distal	13	-3.10972	13.6128
234	wt	female	1	distal	14	-3.63068	15.0396
235	wt	female	1	distal	15	-3.67596	11.8261
236	wt	female	1	distal	16	-2.67776	12.2396
237	wt	female	1	distal	17	-3.55849	12.9652
238	wt	female	1	distal	18	-3.43235	10.6409
239	wt	female	1	distal	19	-3.38559	12.5542
240	wt	female	1	distal	20	-3.08992	13.2828
241	wt	female	2	proximal	1	1.19616	8.76264
242	wt	female	2	proximal	2	1.43566	6.38439
243	wt	female	2	proximal	3	1.52131	8.68689
244	wt	female	2	proximal	4	0.979705	6.61324
245	wt	female	2	proximal	5	1.32337	5.90947
246	wt	female	2	proximal	6	0.649971	7.10316
247	wt	female	2	proximal	7	1.47815	7.66271
248	wt	female	2	proximal	8	0.00727751	5.87207
249	wt	female	2	proximal	9	-1.03375	6.84248
250	wt	female	2	proximal	10	1.09728	6.5882
251	wt	female	2	proximal	11	1.12982	6.72064
252	wt	female	2	proximal	12	0.893989	5.40308
253	wt	female	2	proximal	13	0.771751	5.80603
254	wt	female	2	proximal	14	1.28863	5.67166
255	wt	female	2	proximal	15	1.27907	7.57596
256	wt	female	2	proximal	16	1.30572	7.18029
257	wt	female	2	proximal	17	1.15634	6.57146
258	wt	female	2	proximal	18	0.485584	5.71038
259	wt	female	2	proximal	19	1.63523	6.5882
260	wt	female	2	proximal	20	0.9689	5.18458
261	wt	female	2	distal	1	-2.81206	13.8164
262	wt	female	2	distal	2	-2.52572	11.7494
263	wt	female	2	distal	3	-2.61637	11.4451
264	wt	female	2	distal	4	-2.89315	9.13692
265	wt	female	2	distal	5	-2.72	14.7737
266	wt	female	2	distal	6	-2.73752	9.3878
267	wt	female	2	distal	7	-2.45548	10.5776
268	wt	female	2	distal	8	-2.6906	11.2861
269	wt	female	2	distal	9	-2.58384	9.3878
270	wt	female	2	distal	10	-2.93289	15.193
271	wt	female	2	distal	11	-3.12228	15.8419
272	wt	female	2	distal	12	-2.94198	12.0603
273	wt	female	2	distal	13	-2.98634	15.5513
274	wt	female	2	distal	14	-2.93358	10.9612
275	wt	female	2	distal	15	-3.06771	11.4451
276	wt	female	2	distal	16	-3.0971	13.7915
277	wt	female	2	distal	17	-2.67041	10.4712
278	wt	female	2	distal	18	-3.29817	10.1287
279	wt	female	2	distal	19	-3.13138	13.5459
280	wt	female	2	distal	20	-3.06473	11.4752
281	wt	female	3	proximal	1	0.095941	5.44816
282	wt	female	3	proximal	2	0.544576	6.76964
283	wt	female	3	proximal	3	0.407343	5.37651
284	wt	female	3	proximal	4	0.00645327	6.57414
285	wt	female	3	proximal	5	0.0304311	6.39474
286	wt	female	3	proximal	6	0.430448	5.68253
287	wt	female	3	proximal	7	0.199555	5.70111
288	wt	female	3	proximal	8	-1.11951	6.39474
289	wt	female	3	proximal	9	0.59683	6.06077
290	wt	female	3	proximal	10	-0.397134	6.75922
291	wt	female	3	proximal	11	0.570601	7.29112
292	wt	female	3	proximal	12	-0.398595	9.5774
293	wt	female	3	proximal	13	-0.314657	7.13473
294	wt	female	3	proximal	14	0.126377	6.76964
295	wt	female	3	proximal	15	-0.987244	7.59426
296	wt	female	3	proximal	16	-1.47081	7.48202
297	wt	female	3	proximal	17	-0.134556	6.05495
298	wt	female	3	proximal	18	-0.438582	7.59426
299	wt	female	3	proximal	19	-0.0966007	7.1446
300	wt	female	3	proximal	20	-0.0302901	7.32489
301	wt	female	3	distal	1	-3.38959	9.66533
302	wt	female	3	distal	2	-2.70864	10.8347
303	wt	female	3	distal	3	-2.84024	7.51024
304	wt	female	3	distal	4	-2.78674	10.1631
305	wt	female	3	distal	5	-3.07393	6.63818
306	wt	female	3	distal	6	-2.51184	7.51024
307	wt	female	3	distal	7	-2.29453	8.07569
308	wt	female	3	distal	8	-3.05139	8.69778
309	wt	female	3	distal	9	-3.14796	9.24782
310	wt	female	3	distal	10	-3.70534	10.2495
311	wt	female	3	distal	11	-2.99994	10.8898
312	wt	female	3	distal	12	-3.22929	9.79215
313	wt	female	3	distal	13	-3.66478	9.87818
314	wt	female	3	distal	14	-3.48377	8.07569
315	wt	female	3	distal	15	-2.85134	7.80938
316	wt	female	3	distal	16	-2.89008	9.62146
317	wt	female	3	distal	17	-3.5188	9.59211
318	wt	female	3	distal	18	-3.5986	10.8963
319	wt	female	3	distal	19	-2.60393	11.2716
320	wt	female	3	distal	20	-3.10022	9.967
321	wt	female	4	proximal	1	-0.773113	8.29533
322	wt	female	4	proximal	2	-0.441084	8.56299
323	wt	female	4	proximal	3	-0.550141	7.65897
324	wt	female	4	proximal	4	0.678722	7.22312
325	wt	female	4	proximal	5	0.288972	6.85245
326	wt	female	4	proximal	6	0.0542771	8.07569
327	wt	female	4	proximal	7	0.336126	7.4395
328	wt	female	4	proximal	8	1.28959	7.99342
329	wt	female	4	proximal	9	0.334078	7.83372
330	wt	female	4	proximal	10	-0.17468	8.20289
331	wt	female	4	proximal	11	-0.286373	9.39953
332	wt	female	4	proximal	12	-1.38586	9.90179
333	wt	female	4	proximal	13	-0.430862	8.96768
334	wt	female	4	proximal	14	0.0904864	9.90179
335	wt	female	4	proximal	15	0.145857	8.71221
336	wt	female	4	proximal	16	-0.273047	9.29937
337	wt	female	4	proximal	17	-0.301451	7.64111
338	wt	female	4	proximal	18	-0.850842	7.99342
339	wt	female	4	proximal	19	0.992487	8.83157
340	wt	female	4	proximal	20	1.33024	10.2941
341	wt	female	4	distal	1	-4.00928	12.0317
342	wt	female	4	distal	2	-3.31979	13.9404
343	wt	female	4	distal	3	-3.72195	13.7915
344	wt	female	4	distal	4	-3.90446	13.2309
345	wt	female	4	distal	5	-3.77079	14.9877
346	wt	female	4	distal	6	-3.26447	11.7347
347	wt	female	4	distal	7	-3.61493	13.5903
348	wt	female	4	distal	8	-3.72257	14.402
349	wt	female	4	distal	9	-3.85649	11.4752
350	wt	female	4	distal	10	-3.28647	10.707
351	wt	female	4	distal	11	-3.25958	12.1172
352	wt	female	4	distal	12	-3.21526	12.6183
353	wt	female	4	distal	13	-3.58211	10.8586
354	wt	female	4	distal	14	-3.34512	12.6455
355	wt	female	4	distal	15	-3.09207	10.8586
356	wt	female	4	distal	16	-3.14998	10.9533
357	wt	female	4	distal	17	-3.58677	11.2716
358	wt	female	4	distal	18	-2.88525	12.7674
359	wt	female	4	distal	19	-3.01576	13.0649
360	wt	female	4	distal	20	-3.90645	12.8555
361	wt	female	6	proximal	1	0.247563	8.31761
362	wt	female	6	proximal	2	0.495708	5.71038
363	wt	female	6	proximal	3	0.10547	6.26244
364	wt	female	6	proximal	4	0.990148	6.34111
365	wt	female	6	proximal	5	0.718546	6.1201
366	wt	female	6	proximal	6	1.63582	6.37576
367	wt	female	6	proximal	7	1.14746	6.34111
368	wt	female	6	proximal	8	0.438175	5.52406
369	wt	female	6	proximal	9	0.889547	6.57146
370	wt	female	6	proximal	10	1.10234	7.77687
371	wt	female	6	proximal	11	0.722142	6.57146
372	wt	female	6	proximal	12	1.109	6.54627
373	wt	female	6	proximal	13	0.41712	7.77687
374	wt	female	6	proximal	14	1.57323	6.8102
375	wt	female	6	proximal	15	1.27635	7.97963
376	wt	female	6	proximal	16	1.00478	8.08251
377	wt	female	6	proximal	17	0.217575	5.67957
378	wt	female	6	proximal	18	0.788792	8.66774
379	wt	female	6	proximal	19	0.51323	8.24896
380	wt	female	6	proximal	20	0.471136	8.56299
381	wt	female	6	distal	1	-3.18061	10.707
382	wt	female	6	distal	2	-3.01624	10.1287
383	wt	female	6	distal	3	-3.23881	10.8189
384	wt	female	6	distal	4	-1.86189	10.3056
385	wt	female	6	distal	5	-2.60941	10.8903
386	wt	female	6	distal	6	-3.17932	10.6263
387	wt	female	6	distal	7	-3.26337	9.46086
388	wt	female	6	distal	8	-3.01384	11.4451
389	wt	female	6	distal	9	-2.96957	11.7933
390	wt	female	6	distal	10	-3.35506	7.9697
391	wt	female	6	distal	11	-2.79961	11.1634
392	wt	female	6	distal	12	-3.32662	13.2049
393	wt	female	6	distal	13	-2.88693	10.2469
394	wt	female	6	distal	14	-3.07229	8.55309
395	wt	female	6	distal	15	-3.06376	9.79166
396	wt	female	6	distal	16	-2.95079	9.99178
397	wt	female	6	distal	17	-3.14872	9.68561
398	wt	female	6	distal	18	-2.79508	9.21196
399	wt	female	6	distal	19	-2.82267	10.9533
400	wt	female	6	distal	20	-3.1232	10.0348
401	bco1	male	1	proximal	1	0.493328	9.68561
402	bco1	male	1	proximal	2	0.418871	10.4712
403	bco1	male	1	proximal	3	0.156356	8.55309
404	bco1	male	1	proximal	4	0.476784	8.55309
405	bco1	male	1	proximal	5	0.750734	10.707
406	bco1	male	1	proximal	6	-0.274938	10.6263
407	bco1	male	1	proximal	7	0.909892	11.4451
408	bco1	male	1	proximal	8	-0.041937	8.87895
409	bco1	male	1	proximal	9	0.197101	8.21432
410	bco1	male	1	proximal	10	-0.504076	10.3056
411	bco1	male	1	proximal	11	0.713686	7.06525
412	bco1	male	1	proximal	12	0.817605	7.38684
413	bco1	male	1	proximal	13	0.752109	9.89658
414	bco1	male	1	proximal	14	-0.34057	11.1634
415	bco1	male	1	proximal	15	0.442086	11.7347
416	bco1	male	1	proximal	16	0.146759	10.6263
417	bco1	male	1	proximal	17	-0.111076	12.1172
418	bco1	male	1	proximal	18	-0.276518	7.34008
419	bco1	male	1	proximal	19	0.487736	9.3234
420	bco1	male	1	proximal	20	-0.28967	10.2721
421	bco1	male	1	distal	1	-4.12123	12.6135
422	bco1	male	1	distal	2	-3.48772	13.0227
423	bco1	male	1	distal	3	-3.53293	10.8545
424	bco1	male	1	distal	4	-3.76368	10.6222
425	bco1	male	1	distal	5	-4.12393	15.5675
426	bco1	male	1	distal	6	-3.81455	12.5382
427	bco1	male	1	distal	7	-3.85205	11.043
428	bco1	male	1	distal	8	-3.71979	12.6135
429	bco1	male	1	distal	9	-3.90622	12.695
430	bco1	male	1	distal	10	-3.97484	10.759
431	bco1	male	1	distal	11	-3.70694	7.6472
432	bco1	male	1	distal	12	-3.44772	14.982
433	bco1	male	1	distal	13	-4.20317	11.6198
434	bco1	male	1	distal	14	-3.82558	12.3725
435	bco1	male	1	distal	15	-4.06064	10.8861
436	bco1	male	1	distal	16	-3.72553	11.8615
437	bco1	male	1	distal	17	-3.84417	9.8928
438	bco1	male	1	distal	18	-3.90195	11.1592
439	bco1	male	1	distal	19	-3.84181	11.5306
440	bco1	male	1	distal	20	-3.87694	12.9166
441	bco1	male	2	proximal	1	0.546763	6.97715
442	bco1	male	2	proximal	2	0.111724	7.77911
443	bco1	male	2	proximal	3	-0.172076	9.53448
444	bco1	male	2	proximal	4	0.0479494	8.44232
445	bco1	male	2	proximal	5	-0.147704	9.56265
446	bco1	male	2	proximal	6	0.295821	7.9162
447	bco1	male	2	proximal	7	-0.61399	6.33041
448	bco1	male	2	proximal	8	-0.909204	7.77911
449	bco1	male	2	proximal	9	0.708043	7.42533
450	bco1	male	2	proximal	10	0.216343	6.64142
451	bco1	male	2	proximal	11	0.974884	11.8374
452	bco1	male	2	proximal	12	0.0905251	8.10091
453	bco1	male	2	proximal	13	-0.401041	7.47946
454	bco1	male	2	proximal	14	0.278091	7.3708
455	bco1	male	2	proximal	15	-0.0213352	7.89919
456	bco1	male	2	proximal	16	-0.93357	8.92246
457	bco1	male	2	proximal	17	-0.307519	7.3708
458	bco1	male	2	proximal	18	0.718448	7.42533
459	bco1	male	2	proximal	19	-0.299311	7.42533
460	bco1	male	2	proximal	20	-0.220402	8.92246
461	bco1	male	2	distal	1	-2.98962	10.2721
462	bco1	male	2	distal	2	-3.21087	9.3234
463	bco1	male	2	distal	3	-2.95484	6.90508
464	bco1	male	2	distal	4	-2.58777	7.04085
465	bco1	male	2	distal	5	-2.99156	7.62759
466	bco1	male	2	distal	6	-1.72751	9.13692
467	bco1	male	2	distal	7	-2.47298	7.61629
468	bco1	male	2	distal	8	-2.85732	7.13797
469	bco1	male	2	distal	9	-3.23849	8.4008
470	bco1	male	2	distal	10	-3.38574	7.13797
471	bco1	male	2	distal	11	-3.1167	13.6975
472	bco1	male	2	distal	12	-2.7215	6.97449
473	bco1	male	2	distal	13	-3.24066	6.63889
474	bco1	male	2	distal	14	-2.80315	8.06457
475	bco1	male	2	distal	15	-2.94243	7.77615
476	bco1	male	2	distal	16	-2.23895	9.17161
477	bco1	male	2	distal	17	-2.63637	8.8282
478	bco1	male	2	distal	18	-3.03956	6.63889
479	bco1	male	2	distal	19	-2.27494	8.4391
480	bco1	male	2	distal	20	-2.88092	8.35911
481	bco1	male	3	proximal	1	0.9201	8.44902
482	bco1	male	3	proximal	2	0.283155	6.34111
483	bco1	male	3	proximal	3	1.41008	5.71038
484	bco1	male	3	proximal	4	1.11533	5.63268
485	bco1	male	3	proximal	5	0.325594	7.74849
486	bco1	male	3	proximal	6	0.647725	5.6522
487	bco1	male	3	proximal	7	0.982281	5.90947
488	bco1	male	3	proximal	8	-0.291798	6.37576
489	bco1	male	3	proximal	9	0.568417	6.8102
490	bco1	male	3	proximal	10	0.17644	6.1201
491	bco1	male	3	proximal	11	0.237752	6.90658
492	bco1	male	3	proximal	12	0.503625	7.36957
493	bco1	male	3	proximal	13	0.216397	6.99845
494	bco1	male	3	proximal	14	-0.0573092	8.66514
495	bco1	male	3	proximal	15	0.264998	7.07233
496	bco1	male	3	proximal	16	0.00653174	7.46565
497	bco1	male	3	proximal	17	0.123589	7.13939
498	bco1	male	3	proximal	18	0.509996	7.70549
499	bco1	male	3	proximal	19	1.19436	6.69475
500	bco1	male	3	proximal	20	0.453762	7.07233
501	bco1	male	3	distal	1	-2.77938	6.34111
502	bco1	male	3	distal	2	-2.92473	7.00162
503	bco1	male	3	distal	3	-2.83519	5.6522
504	bco1	male	3	distal	4	-2.46087	8.93075
505	bco1	male	3	distal	5	-2.58657	6.84248
506	bco1	male	3	distal	6	-2.67234	10.8722
507	bco1	male	3	distal	7	-2.98051	10.0946
508	bco1	male	3	distal	8	-2.05149	7.45872
509	bco1	male	3	distal	9	-3.33332	7.99342
510	bco1	male	3	distal	10	-2.71971	6.67954
511	bco1	male	3	distal	11	-3.39405	7.51024
512	bco1	male	3	distal	12	-3.62138	6.83442
513	bco1	male	3	distal	13	-2.47635	6.37576
514	bco1	male	3	distal	14	-2.72443	5.64518
515	bco1	male	3	distal	15	-3.53133	6.1931
516	bco1	male	3	distal	16	-3.96927	6.63818
517	bco1	male	3	distal	17	-3.21932	5.96698
518	bco1	male	3	distal	18	-2.10112	7.22312
519	bco1	male	3	distal	19	-2.72736	7.32489
520	bco1	male	3	distal	20	-2.39947	7.51493
521	bdh1a	male	1	proximal	1	-3.22683	9.1751
522	bdh1a	male	1	proximal	2	-2.82799	14.012
523	bdh1a	male	1	proximal	3	-2.70563	9.23354
524	bdh1a	male	1	proximal	4	-2.28435	10.6914
525	bdh1a	male	1	proximal	5	-2.48906	10.501
526	bdh1a	male	1	proximal	6	-3.24219	8.44232
527	bdh1a	male	1	proximal	7	-2.85809	9.56265
528	bdh1a	male	1	proximal	8	-2.28726	8.83157
529	bdh1a	male	1	proximal	9	-2.9383	12.8087
530	bdh1a	male	1	proximal	10	-2.48915	10.3722
531	bdh1a	male	1	proximal	11	-2.15824	12.2396
532	bdh1a	male	1	proximal	12	-3.20837	8.3623
533	bdh1a	male	1	proximal	13	-2.92478	10.501
534	bdh1a	male	1	proximal	14	-2.76958	9.64666
535	bdh1a	male	1	proximal	15	-2.37566	9.64666
536	bdh1a	male	1	proximal	16	-2.41369	13.5733
537	bdh1a	male	1	proximal	17	-3.10167	7.42533
538	bdh1a	male	1	proximal	18	-2.13114	9.56265
539	bdh1a	male	1	proximal	19	-1.95319	8.06764
540	bdh1a	male	1	proximal	20	-2.06538	8.10091
541	bdh1a	male	1	distal	1	-4.18566	10.1599
542	bdh1a	male	1	distal	2	-4.02244	10.9931
543	bdh1a	male	1	distal	3	-3.41378	11.0481
544	bdh1a	male	1	distal	4	-4.07922	11.2751
545	bdh1a	male	1	distal	5	-4.2475	12.2447
546	bdh1a	male	1	distal	6	-4.30001	11.4641
547	bdh1a	male	1	distal	7	-3.95089	9.43462
548	bdh1a	male	1	distal	8	-4.16058	12.4764
549	bdh1a	male	1	distal	9	-4.0426	12.7809
550	bdh1a	male	1	distal	10	-4.60256	5.86737
551	bdh1a	male	1	distal	11	-3.39153	14.8434
552	bdh1a	male	1	distal	12	-3.71038	13.1788
553	bdh1a	male	1	distal	13	-4.1529	8.29772
554	bdh1a	male	1	distal	14	-3.49778	11.9455
555	bdh1a	male	1	distal	15	-3.70016	12.6183
556	bdh1a	male	1	distal	16	-3.30775	14.4497
557	bdh1a	male	1	distal	17	-3.68907	10.0348
558	bdh1a	male	1	distal	18	-3.70052	13.1764
559	bdh1a	male	1	distal	19	-4.07742	12.2851
560	bdh1a	male	1	distal	20	-3.96111	10.1164
561	bdh1a	male	2	proximal	1	-3.45112	9.96213
562	bdh1a	male	2	proximal	2	-2.944	8.83157
563	bdh1a	male	2	proximal	3	-2.7833	11.0987
564	bdh1a	male	2	proximal	4	-3.26045	9.90798
565	bdh1a	male	2	proximal	5	-2.41215	11.7576
566	bdh1a	male	2	proximal	6	-2.22519	11.9392
567	bdh1a	male	2	proximal	7	-3.14366	9.56265
568	bdh1a	male	2	proximal	8	-3.17142	10.2679
569	bdh1a	male	2	proximal	9	-3.13678	10.6409
570	bdh1a	male	2	proximal	10	-3.05666	11.515
571	bdh1a	male	2	proximal	11	-2.83803	9.23354
572	bdh1a	male	2	proximal	12	-2.6507	9.64666
573	bdh1a	male	2	proximal	13	-1.86275	6.97715
574	bdh1a	male	2	proximal	14	-3.67687	10.6914
575	bdh1a	male	2	proximal	15	-3.31924	11.0013
576	bdh1a	male	2	proximal	16	-3.30071	12.9963
577	bdh1a	male	2	proximal	17	-3.52998	10.2285
578	bdh1a	male	2	proximal	18	-3.80764	10.6914
579	bdh1a	male	2	proximal	19	-3.57559	8.58448
580	bdh1a	male	2	proximal	20	-3.97188	9.64666
581	bdh1a	male	2	distal	1	-4.23448	11.2192
582	bdh1a	male	2	distal	2	-4.46629	9.90798
583	bdh1a	male	2	distal	3	-4.24314	12.1514
584	bdh1a	male	2	distal	4	-3.68782	13.9639
585	bdh1a	male	2	distal	5	-4.33433	12.1514
586	bdh1a	male	2	distal	6	-2.81826	12.2944
587	bdh1a	male	2	distal	7	-4.04638	12.4682
588	bdh1a	male	2	distal	8	-3.95846	15.8069
589	bdh1a	male	2	distal	9	-4.45127	13.9543
590	bdh1a	male	2	distal	10	-4.191	11.4211
591	bdh1a	male	2	distal	11	-4.19588	11.4211
592	bdh1a	male	2	distal	12	-4.23547	14.6776
593	bdh1a	male	2	distal	13	-4.68573	13.9639
594	bdh1a	male	2	distal	14	-3.95349	12.4897
595	bdh1a	male	2	distal	15	-4.5001	10.4169
596	bdh1a	male	2	distal	16	-3.91902	12.4941
597	bdh1a	male	2	distal	17	-4.25133	13.6244
598	bdh1a	male	2	distal	18	-4.0638	13.3961
599	bdh1a	male	2	distal	19	-3.22231	14.3183
600	bdh1a	male	2	distal	20	-4.08104	14.7153
601	bdh1a	male	3	proximal	1	-2.92724	9.83551
602	bdh1a	male	3	proximal	2	-3.50078	6.16772
603	bdh1a	male	3	proximal	3	-2.56785	7.38684
604	bdh1a	male	3	proximal	4	-2.67245	8.63322
605	bdh1a	male	3	proximal	5	-2.78315	5.77869
606	bdh1a	male	3	proximal	6	-2.59834	12.4466
607	bdh1a	male	3	proximal	7	-2.27043	7.61629
608	bdh1a	male	3	proximal	8	-2.14009	5.28064
609	bdh1a	male	3	proximal	9	-2.23253	7.65012
610	bdh1a	male	3	proximal	10	-2.80001	5.94026
611	bdh1a	male	3	proximal	11	-3.0418	7.10316
612	bdh1a	male	3	proximal	12	-2.65923	6.54627
613	bdh1a	male	3	proximal	13	-3.27924	6.63818
614	bdh1a	male	3	proximal	14	-2.44777	7.51024
615	bdh1a	male	3	proximal	15	-2.17616	7.18029
616	bdh1a	male	3	proximal	16	-1.73538	7.04085
617	bdh1a	male	3	proximal	17	-3.3028	7.00162
618	bdh1a	male	3	proximal	18	-2.53919	6.10207
619	bdh1a	male	3	proximal	19	-2.71099	6.84248
620	bdh1a	male	3	proximal	20	-2.60646	7.91726
621	bdh1a	male	3	distal	1	-3.35648	15.2372
622	bdh1a	male	3	distal	2	-3.5005	12.6926
623	bdh1a	male	3	distal	3	-3.31775	12.0398
624	bdh1a	male	3	distal	4	-3.64267	14.113
625	bdh1a	male	3	distal	5	-3.14743	10.4639
626	bdh1a	male	3	distal	6	-3.59873	10.9929
627	bdh1a	male	3	distal	7	-3.03096	12.4826
628	bdh1a	male	3	distal	8	-3.74211	11.6651
629	bdh1a	male	3	distal	9	-3.21674	15.776
630	bdh1a	male	3	distal	10	-4.10492	10.0344
631	bdh1a	male	3	distal	11	-3.72706	10.6883
632	bdh1a	male	3	distal	12	-3.75928	13.1513
633	bdh1a	male	3	distal	13	-3.65649	12.4278
634	bdh1a	male	3	distal	14	-3.44835	10.5639
635	bdh1a	male	3	distal	15	-3.94223	12.068
636	bdh1a	male	3	distal	16	-3.82277	12.0817
637	bdh1a	male	3	distal	17	-3.77555	12.6169
638	bdh1a	male	3	distal	18	-3.74231	10.8874
639	bdh1a	male	3	distal	19	-4.25631	10.8062
640	bdh1a	male	3	distal	20	-3.77293	11.0481
641	cyp2ae2	male	1	proximal	1	-0.807701	11.6168
642	cyp2ae2	male	1	proximal	2	-1.08901	11.0481
643	cyp2ae2	male	1	proximal	3	-1.01287	9.51022
644	cyp2ae2	male	1	proximal	4	-0.704309	10.3266
645	cyp2ae2	male	1	proximal	5	-1.02072	9.95726
646	cyp2ae2	male	1	proximal	6	-0.730406	9.18014
647	cyp2ae2	male	1	proximal	7	-0.839981	8.65512
648	cyp2ae2	male	1	proximal	8	-0.648622	7.97963
649	cyp2ae2	male	1	proximal	9	-1.15135	8.96768
650	cyp2ae2	male	1	proximal	10	-0.718767	9.22802
651	cyp2ae2	male	1	proximal	11	-0.865226	8.19754
652	cyp2ae2	male	1	proximal	12	-0.489695	8.02094
653	cyp2ae2	male	1	proximal	13	-0.744211	10.5745
654	cyp2ae2	male	1	proximal	14	-0.757137	9.20579
655	cyp2ae2	male	1	proximal	15	-0.376049	10.0935
656	cyp2ae2	male	1	proximal	16	-1.24012	9.8516
657	cyp2ae2	male	1	proximal	17	-0.902654	10.3904
658	cyp2ae2	male	1	proximal	18	-1.36133	9.25963
659	cyp2ae2	male	1	proximal	19	-0.951337	9.53014
660	cyp2ae2	male	1	proximal	20	-1.15773	8.56796
661	cyp2ae2	male	1	distal	1	-4.17492	10.4269
662	cyp2ae2	male	1	distal	2	-3.91706	11.4441
663	cyp2ae2	male	1	distal	3	-3.69362	13.1178
664	cyp2ae2	male	1	distal	4	-3.80048	9.11949
665	cyp2ae2	male	1	distal	5	-3.99938	11.5773
666	cyp2ae2	male	1	distal	6	-3.56445	12.5063
667	cyp2ae2	male	1	distal	7	-4.33238	13.404
668	cyp2ae2	male	1	distal	8	-3.94807	9.814
669	cyp2ae2	male	1	distal	9	-3.85543	12.1568
670	cyp2ae2	male	1	distal	10	-3.58161	10.6766
671	cyp2ae2	male	1	distal	11	-3.53743	12.9789
672	cyp2ae2	male	1	distal	12	-3.82149	12.6524
673	cyp2ae2	male	1	distal	13	-3.7657	13.854
674	cyp2ae2	male	1	distal	14	-3.95607	11.4778
675	cyp2ae2	male	1	distal	15	-3.65327	12.3725
676	cyp2ae2	male	1	distal	16	-3.60289	11.1764
677	cyp2ae2	male	1	distal	17	-4.10638	12.2731
678	cyp2ae2	male	1	distal	18	-2.98494	9.76261
679	cyp2ae2	male	1	distal	19	-3.74711	10.968
680	cyp2ae2	male	1	distal	20	-3.80844	11.2405
681	cyp2ae2	male	2	proximal	1	-0.256587	9.31027
682	cyp2ae2	male	2	proximal	2	-0.579379	9.57371
683	cyp2ae2	male	2	proximal	3	-0.734107	10.0946
684	cyp2ae2	male	2	proximal	4	-0.640719	9.76173
685	cyp2ae2	male	2	proximal	5	-0.525861	9.95726
686	cyp2ae2	male	2	proximal	6	-0.818497	9.49282
687	cyp2ae2	male	2	proximal	7	-0.894606	11.3044
688	cyp2ae2	male	2	proximal	8	-0.867342	8.71221
689	cyp2ae2	male	2	proximal	9	-1.1078	9.15611
690	cyp2ae2	male	2	proximal	10	-0.65463	9.90179
691	cyp2ae2	male	2	proximal	11	-0.889888	9.49282
692	cyp2ae2	male	2	proximal	12	-0.717842	8.50101
693	cyp2ae2	male	2	proximal	13	-0.88051	9.8516
694	cyp2ae2	male	2	proximal	14	-0.876356	11.0481
695	cyp2ae2	male	2	proximal	15	-0.842846	10.2516
696	cyp2ae2	male	2	proximal	16	-1.50372	9.39366
697	cyp2ae2	male	2	proximal	17	-0.973694	10.2516
698	cyp2ae2	male	2	proximal	18	-0.844538	7.99342
699	cyp2ae2	male	2	proximal	19	-0.304357	9.5774
700	cyp2ae2	male	2	proximal	20	-1.27815	11.2026
701	cyp2ae2	male	2	distal	1	-4.14303	11.0472
702	cyp2ae2	male	2	distal	2	-3.86114	12.3579
703	cyp2ae2	male	2	distal	3	-3.66241	11.9805
704	cyp2ae2	male	2	distal	4	-3.71525	14.066
705	cyp2ae2	male	2	distal	5	-3.59938	9.9218
706	cyp2ae2	male	2	distal	6	-3.51393	11.5583
707	cyp2ae2	male	2	distal	7	-4.25646	13.4032
708	cyp2ae2	male	2	distal	8	-3.49064	12.0448
709	cyp2ae2	male	2	distal	9	-3.94277	14.5398
710	cyp2ae2	male	2	distal	10	-3.88504	11.7943
711	cyp2ae2	male	2	distal	11	-4.18254	11.6036
712	cyp2ae2	male	2	distal	12	-3.63593	13.9232
713	cyp2ae2	male	2	distal	13	-3.77247	9.98599
714	cyp2ae2	male	2	distal	14	-4.25978	13.0709
715	cyp2ae2	male	2	distal	15	-3.01511	11.7671
716	cyp2ae2	male	2	distal	16	-3.73727	13.6672
717	cyp2ae2	male	2	distal	17	-3.80667	13.3008
718	cyp2ae2	male	2	distal	18	-3.34103	10.4684
719	cyp2ae2	male	2	distal	19	-3.6435	12.4955
720	cyp2ae2	male	2	distal	20	-3.63909	11.1286
721	cyp2ae2	male	3	proximal	1	-0.962287	10.8898
722	cyp2ae2	male	3	proximal	2	-0.939264	11.2057
723	cyp2ae2	male	3	proximal	3	-1.02558	11.934
724	cyp2ae2	male	3	proximal	4	-1.19717	13.8482
725	cyp2ae2	male	3	proximal	5	-1.46246	11.1679
726	cyp2ae2	male	3	proximal	6	-1.54769	11.4053
727	cyp2ae2	male	3	proximal	7	-1.02523	10.6807
728	cyp2ae2	male	3	proximal	8	-1.00888	9.79215
729	cyp2ae2	male	3	proximal	9	-1.51572	9.02011
730	cyp2ae2	male	3	proximal	10	-1.64781	11.2966
731	cyp2ae2	male	3	proximal	11	-1.03697	9.05724
732	cyp2ae2	male	3	proximal	12	-1.24839	11.2904
733	cyp2ae2	male	3	proximal	13	-1.11504	10.2316
734	cyp2ae2	male	3	proximal	14	-1.15689	13.7178
735	cyp2ae2	male	3	proximal	15	-1.09246	10.9929
736	cyp2ae2	male	3	proximal	16	-1.69815	12.817
737	cyp2ae2	male	3	proximal	17	-1.88862	10.9186
738	cyp2ae2	male	3	proximal	18	-1.32973	11.514
739	cyp2ae2	male	3	proximal	19	-0.911057	9.53372
740	cyp2ae2	male	3	proximal	20	-1.22183	9.05471
741	cyp2ae2	male	3	distal	1	-3.41711	12.2119
742	cyp2ae2	male	3	distal	2	-3.61942	12.4647
743	cyp2ae2	male	3	distal	3	-3.57554	12.3365
744	cyp2ae2	male	3	distal	4	-3.65581	15.0474
745	cyp2ae2	male	3	distal	5	-3.7041	15.2315
746	cyp2ae2	male	3	distal	6	-3.23743	12.3589
747	cyp2ae2	male	3	distal	7	-3.25248	12.9461
748	cyp2ae2	male	3	distal	8	-3.26741	13.408
749	cyp2ae2	male	3	distal	9	-3.44316	10.4323
750	cyp2ae2	male	3	distal	10	-3.3358	9.52114
751	cyp2ae2	male	3	distal	11	-3.53384	12.6044
752	cyp2ae2	male	3	distal	12	-3.48158	14.0001
753	cyp2ae2	male	3	distal	13	-3.53076	15.3841
754	cyp2ae2	male	3	distal	14	-3.73108	13.8895
755	cyp2ae2	male	3	distal	15	-3.59895	15.2243
756	cyp2ae2	male	3	distal	16	-3.20313	13.6681
757	cyp2ae2	male	3	distal	17	-3.0764	15.7109
758	cyp2ae2	male	3	distal	18	-3.72484	12.8649
759	cyp2ae2	male	3	distal	19	-3.20339	12.3908
760	cyp2ae2	male	3	distal	20	-3.0179	11.9841

[truncated: 1 more sheets: Table 11—Figure 7F]
